# Supplementary material
Source: PubMed Central journal article supplement (PMC4936967)
Supplement: NIHMS783958-supplement-10.pdf [file NIHMS783958-supplement-10.pdf]

Table 3 Differential expression results from gene microarray study

**GS87**

| <b>Gene</b> | <b>LogFC.GS87 - untreated</b> | <b>p.value.adj.GS87 - untreated</b> |
|-------------|-------------------------------|-------------------------------------|
| PRTN3       | -6.12                         | 0                                   |
| ZFPM2       | -5.69                         | 0.00762                             |
| MIR425      | -5.5                          | 0.02167                             |
| GPM6B       | -5.02                         | 0.00055                             |
| SLC23A3     | -5                            | 0.00983                             |
| SNORA79     | -4.92                         | 0.04537                             |
| VAT1L       | -4.9                          | 0                                   |
| FAM46C      | -4.81                         | 0                                   |
| DDN         | -4.74                         | 0                                   |
| GAL         | -4.65                         | 0                                   |
| SPNS3       | -4.63                         | 1.00E-05                            |
| IRF8        | -4.57                         | 0                                   |
| ACCN2       | -4.57                         | 0.00026                             |
| MPO         | -4.38                         | 0                                   |
| C20ORF103   | -4.35                         | 0                                   |
| TCEA3       | -4.31                         | 1.00E-05                            |
| CTSG        | -4.29                         | 0                                   |
| CPA6        | -4.29                         | 0.04099                             |
| BCL11A      | -4.24                         | 0                                   |
| AFF3        | -4.14                         | 3.00E-05                            |
| BZRAP1      | -4.11                         | 1.00E-05                            |
| NAT8L       | -4.11                         | 0.01806                             |
| FAM69B      | -4.09                         | 0                                   |
| RNASE3      | -4.05                         | 0.0027                              |
| GPR85       | -4.02                         | 0.01673                             |
| DYSFIP1     | -3.93                         | 0                                   |
| GARNL3      | -3.9                          | 0.01281                             |
| UPK2        | -3.82                         | 0.02753                             |
| KLK1        | -3.78                         | 0.02241                             |
| C10ORF10    | -3.75                         | 0.03697                             |
| ELANE       | -3.72                         | 0                                   |
| CTXN1       | -3.72                         | 5.00E-05                            |
| EBF3        | -3.69                         | 0                                   |
| REEP1       | -3.69                         | 0.02793                             |
| PRG2        | -3.67                         | 0                                   |
| RGS16       | -3.66                         | 6.00E-05                            |
| SYNGR1      | -3.63                         | 0                                   |
| C5ORF20     | -3.62                         | 0                                   |
| ADAMTS3     | -3.61                         | 0.03369                             |

|            |       |          |
|------------|-------|----------|
| HPDL       | -3.55 | 0        |
| DTNB       | -3.55 | 0.04734  |
| GRM8       | -3.54 | 0.00732  |
| PNMA6A     | -3.45 | 0.00241  |
| E2F5       | -3.44 | 0        |
| SERPINB10  | -3.42 | 0        |
| CD320      | -3.42 | 1.00E-05 |
| PRSSL1     | -3.42 | 3.00E-04 |
| GATM       | -3.38 | 0        |
| PODXL2     | -3.38 | 1.00E-05 |
| GPR124     | -3.38 | 0.00071  |
| SNHG3-RCC1 | -3.38 | 0.01498  |
| KRBA1      | -3.35 | 0.00866  |
| MYC        | -3.3  | 0        |
| ZDHHC8     | -3.29 | 0        |
| NFIA       | -3.29 | 0.00042  |
| MS4A3      | -3.28 | 0        |
| PDZD7      | -3.28 | 0.01149  |
| MATK       | -3.26 | 0        |
| THBS4      | -3.19 | 0        |
| GZMH       | -3.19 | 0.04039  |
| FLT3       | -3.18 | 0        |
| C3ORF54    | -3.1  | 0        |
| MLC1       | -3.09 | 0        |
| LPPR3      | -3.09 | 0.00698  |
| C1ORF188   | -3.07 | 0        |
| C5ORF13    | -3.07 | 0        |
| SLC39A14   | -3.06 | 0        |
| ALDH5A1    | -3.05 | 0        |
| DPY19L2    | -3.03 | 0.04471  |
| SOCS2      | -3.01 | 0        |
| GPR18      | -3.01 | 1.00E-05 |
| MS4A6A     | -3    | 0        |
| FAM131B    | -2.98 | 0.00802  |
| MAP6D1     | -2.95 | 0        |
| CHST4      | -2.95 | 0.00531  |
| SHISA2     | -2.93 | 0        |
| PRLR       | -2.93 | 0.00047  |
| KCNN2      | -2.92 | 0        |
| AZU1       | -2.91 | 0        |
| CD59       | -2.91 | 0        |

|          |       |          |
|----------|-------|----------|
| DACH1    | -2.91 | 0        |
| KNG1     | -2.9  | 0.00532  |
| RPL36A   | -2.89 | 0        |
| SCGB1D2  | -2.89 | 0.00107  |
| PACSIN3  | -2.88 | 0.002    |
| CA8      | -2.87 | 0        |
| NTHL1    | -2.87 | 0        |
| FZD2     | -2.86 | 0.00028  |
| IMMP2L   | -2.84 | 0        |
| RPP40    | -2.82 | 0        |
| USP18    | -2.81 | 0.01147  |
| GCSH     | -2.8  | 0        |
| MMACHC   | -2.79 | 1.00E-05 |
| TET1     | -2.79 | 0.00925  |
| C1ORF186 | -2.78 | 0        |
| GCAT     | -2.77 | 0        |
| CCDC36   | -2.76 | 0.02591  |
| BEX2     | -2.76 | 0.03645  |
| ASS1     | -2.74 | 0        |
| PLD6     | -2.74 | 0        |
| FJX1     | -2.72 | 3.00E-05 |
| RXFP1    | -2.72 | 0.00217  |
| MYBBP1A  | -2.71 | 1.00E-05 |
| CFD      | -2.68 | 0        |
| ISOC2    | -2.67 | 0        |
| MACROD1  | -2.67 | 1.00E-05 |
| NPAS1    | -2.66 | 0.03007  |
| WT1      | -2.65 | 0        |
| LILRB4   | -2.65 | 0.00206  |
| IRAK1BP1 | -2.63 | 6.00E-05 |
| WWC1     | -2.63 | 0.00021  |
| NLRP2    | -2.63 | 0.00506  |
| FAM117B  | -2.62 | 0        |
| PM20D2   | -2.61 | 0        |
| SRM      | -2.61 | 0        |
| ADAM23   | -2.61 | 0.01219  |
| TUBA3E   | -2.6  | 0.03415  |
| SLC29A2  | -2.59 | 0        |
| HTR6     | -2.59 | 0.01227  |
| FEZ1     | -2.58 | 0        |
| NOP16    | -2.57 | 0        |

|          |       |          |
|----------|-------|----------|
| FLJ39827 | -2.56 | 0        |
| GABRB2   | -2.56 | 0.00197  |
| PNMA3    | -2.55 | 4.00E-05 |
| DEPDC6   | -2.54 | 0.00598  |
| ABCB10   | -2.53 | 0        |
| BMP8B    | -2.52 | 0        |
| SIDT1    | -2.52 | 0.00339  |
| MAP4K1   | -2.5  | 0.00033  |
| ALDH1B1  | -2.49 | 1.00E-05 |
| PUS7     | -2.48 | 0        |
| SAMD13   | -2.47 | 0.00145  |
| CCND2    | -2.46 | 0        |
| ZDHHC11  | -2.46 | 1.00E-05 |
| PARD6G   | -2.45 | 1.00E-04 |
| C7ORF68  | -2.44 | 0        |
| SLC25A23 | -2.43 | 0        |
| SPNS2    | -2.43 | 2.00E-05 |
| C16ORF13 | -2.42 | 0        |
| PDIA5    | -2.41 | 0        |
| MRPL12   | -2.41 | 4.00E-05 |
| SLITRK5  | -2.41 | 5.00E-05 |
| BCL2     | -2.39 | 0        |
| C12ORF24 | -2.39 | 0        |
| PDCD2L   | -2.39 | 0        |
| TRAP1    | -2.39 | 0        |
| DNAJC12  | -2.38 | 0        |
| SLC25A15 | -2.38 | 0.00055  |
| ALDH18A1 | -2.37 | 0        |
| C21ORF56 | -2.37 | 0.00415  |
| ARHGAP5  | -2.36 | 8.00E-05 |
| GLB1L2   | -2.36 | 0.02187  |
| CYORF15A | -2.36 | 0.04001  |
| C10ORF2  | -2.35 | 0        |
| WIT1     | -2.34 | 0.00025  |
| TMEM161A | -2.34 | 0.00082  |
| C20ORF27 | -2.33 | 0        |
| WDR21A   | -2.33 | 0.00015  |
| KAT2A    | -2.32 | 0        |
| PFN2     | -2.32 | 0.00045  |
| ABCC4    | -2.31 | 0        |
| AK3L1    | -2.29 | 0        |

|          |       |          |
|----------|-------|----------|
| SFXN2    | -2.29 | 1.00E-05 |
| ADA      | -2.29 | 2.00E-05 |
| AFMID    | -2.29 | 5.00E-05 |
| DLEU1    | -2.27 | 0        |
| CCDC86   | -2.25 | 0        |
| SLC27A5  | -2.25 | 4.00E-05 |
| LGR4     | -2.24 | 1.00E-05 |
| LASS1    | -2.24 | 3.00E-05 |
| POLR3G   | -2.24 | 0.00097  |
| C9ORF140 | -2.23 | 0        |
| NPM3     | -2.23 | 0        |
| SLC25A19 | -2.23 | 0        |
| RNF207   | -2.23 | 9.00E-05 |
| ALKBH2   | -2.22 | 0        |
| RPL29    | -2.22 | 0        |
| SDK2     | -2.22 | 1.00E-05 |
| ACY1     | -2.22 | 2.00E-05 |
| C18ORF22 | -2.22 | 2.00E-05 |
| SLC17A9  | -2.22 | 8.00E-05 |
| GAMT     | -2.2  | 0        |
| TYSND1   | -2.2  | 0        |
| C3ORF26  | -2.19 | 0        |
| CDK6     | -2.19 | 0        |
| DBP      | -2.18 | 0.00014  |
| MPP6     | -2.17 | 0        |
| NME1     | -2.17 | 0        |
| CDCA7    | -2.16 | 0        |
| WNT10B   | -2.16 | 0.03838  |
| MIF      | -2.15 | 0        |
| RPS7     | -2.15 | 0        |
| UNG      | -2.15 | 0        |
| CXORF21  | -2.15 | 1.00E-05 |
| HEATR1   | -2.14 | 0        |
| TFAP4    | -2.14 | 0        |
| NHEDC2   | -2.14 | 2.00E-05 |
| IL12A    | -2.14 | 0.02436  |
| GLCC1    | -2.13 | 2.00E-05 |
| PIK3C2B  | -2.13 | 0.02642  |
| RAB40B   | -2.12 | 1.00E-05 |
| B3GNT6   | -2.12 | 0.00037  |
| IQUB     | -2.12 | 0.01801  |

|          |       |          |
|----------|-------|----------|
| VIT      | -2.11 | 0        |
| WIT-1    | -2.11 | 0.00102  |
| FLJ46156 | -2.11 | 0.02187  |
| PRRG2    | -2.11 | 0.03191  |
| P2RY2    | -2.1  | 0        |
| RNF175   | -2.1  | 0.00054  |
| PLCH1    | -2.1  | 0.01615  |
| NOLC1    | -2.09 | 0        |
| LRRC34   | -2.09 | 0.00124  |
| PSMG4    | -2.08 | 0        |
| TGIF2    | -2.08 | 0        |
| EXOSC5   | -2.08 | 1.00E-05 |
| ID3      | -2.08 | 0.00055  |
| DZIP1    | -2.08 | 0.03677  |
| IL26     | -2.08 | 0.03865  |
| C7ORF41  | -2.07 | 0        |
| MCOLN2   | -2.07 | 0        |
| TSTA3    | -2.07 | 1.00E-05 |
| UBIAD1   | -2.06 | 0        |
| CHCHD6   | -2.05 | 0        |
| SLMO1    | -2.05 | 0        |
| KLHL23   | -2.05 | 0.00308  |
| KLF11    | -2.04 | 0        |
| PRMT1    | -2.04 | 0        |
| LDLRAD3  | -2.04 | 1.00E-05 |
| GIYD2    | -2.04 | 0.02103  |
| BOP1     | -2.03 | 0        |
| IFRD2    | -2.03 | 0        |
| MIPEP    | -2.03 | 3.00E-05 |
| GCDH     | -2.02 | 0        |
| TMOD1    | -2.02 | 8.00E-05 |
| PTPRCAP  | -2.01 | 0        |
| MSRB3    | -2.01 | 0.00011  |
| ZSCAN23  | -2.01 | 0.00311  |
| ZNF286A  | -2.01 | 0.01342  |
| VAPB     | -2.01 | 0.04211  |
| CBS      | -2    | 0        |
| HSPC111  | -2    | 0        |
| PCCB     | -1.99 | 0        |
| TNKS1BP1 | -1.99 | 0.00016  |
| GPT2     | -1.98 | 0        |

|          |       |          |
|----------|-------|----------|
| WDR12    | -1.98 | 0        |
| WDR54    | -1.98 | 0        |
| TEAD4    | -1.98 | 2.00E-05 |
| CNKSR3   | -1.98 | 0.00024  |
| C1ORF93  | -1.98 | 0.00096  |
| KIAA0114 | -1.97 | 0        |
| POLD2    | -1.97 | 0        |
| SLC39A3  | -1.97 | 0        |
| MECR     | -1.97 | 0.00023  |
| CEP68    | -1.97 | 0.01843  |
| CENPM    | -1.96 | 0        |
| DTNA     | -1.96 | 0        |
| GEMIN5   | -1.96 | 0        |
| IFT57    | -1.96 | 0        |
| PEBP1    | -1.96 | 0        |
| ITM2A    | -1.96 | 0.00013  |
| PTCD2    | -1.96 | 0.00027  |
| DHODH    | -1.96 | 0.00095  |
| DAD1L    | -1.96 | 0.0066   |
| ANKLE1   | -1.95 | 0        |
| DPH2     | -1.95 | 0        |
| TFB2M    | -1.95 | 0        |
| MDN1     | -1.95 | 1.00E-05 |
| KILLIN   | -1.95 | 0.01489  |
| GPD1L    | -1.94 | 0        |
| PSAT1    | -1.94 | 0        |
| SIGMAR1  | -1.94 | 0        |
| C18ORF45 | -1.94 | 0.00087  |
| FAM189B  | -1.93 | 0        |
| SMYD2    | -1.93 | 0        |
| BEND3    | -1.93 | 0.00012  |
| C10ORF79 | -1.93 | 0.0047   |
| CRYZ     | -1.92 | 0        |
| NARS2    | -1.92 | 0        |
| RRP1     | -1.92 | 0        |
| MEST     | -1.92 | 0.03045  |
| EBNA1BP2 | -1.91 | 0        |
| IPO4     | -1.91 | 0        |
| P2RY8    | -1.91 | 1.00E-05 |
| ICOSLG   | -1.91 | 5.00E-05 |
| MCM3APAS | -1.91 | 0.00196  |



|             |       |          |
|-------------|-------|----------|
| OXCT2       | -1.9  | 0        |
| PPAT        | -1.9  | 0        |
| SCARB1      | -1.9  | 0        |
| SUPV3L1     | -1.9  | 0        |
| NMNAT3      | -1.9  | 0.00913  |
| KHDRBS3     | -1.9  | 0.00968  |
| TMEM231     | -1.89 | 1.00E-05 |
| TTC26       | -1.89 | 1.00E-05 |
| SNORA71A    | -1.89 | 0.03383  |
| TMEM97      | -1.88 | 0        |
| CAD         | -1.88 | 1.00E-05 |
| LZTFL1      | -1.88 | 2.00E-05 |
| REEP6       | -1.88 | 0.02536  |
| CLYBL       | -1.87 | 0        |
| MTHFD1L     | -1.87 | 0        |
| NHP2        | -1.87 | 0        |
| PPAN-P2RY11 | -1.87 | 3.00E-05 |
| GAR1        | -1.86 | 0        |
| HSPB1       | -1.86 | 0        |
| KBTBD6      | -1.86 | 0        |
| MBLAC2      | -1.86 | 0        |
| NDUFAF2     | -1.86 | 0        |
| UTP20       | -1.86 | 0.00093  |
| GSDM1       | -1.86 | 0.00144  |
| CABC1       | -1.85 | 0        |
| CENPV       | -1.85 | 0        |
| LRRC20      | -1.85 | 0        |
| LYAR        | -1.85 | 0        |
| NR2F2       | -1.85 | 0        |
| URB2        | -1.85 | 0        |
| HSH2D       | -1.85 | 1.00E-05 |
| ZNF354C     | -1.85 | 0.02723  |
| IQCK        | -1.84 | 3.00E-05 |
| MRT04       | -1.84 | 4.00E-05 |
| FBL         | -1.83 | 0        |
| GINS2       | -1.83 | 0        |
| ST6GAL1     | -1.83 | 0        |
| FLJ13305    | -1.83 | 1.00E-05 |
| DJ222E13.2  | -1.83 | 5.00E-05 |
| TTC7A       | -1.83 | 0.00295  |
| SNORA23     | -1.83 | 0.03754  |

|          |       |          |
|----------|-------|----------|
| IMP4     | -1.82 | 0        |
| TOP1MT   | -1.82 | 0        |
| FAHD2B   | -1.82 | 1.00E-05 |
| RUVBL1   | -1.82 | 2.00E-05 |
| FAM86C   | -1.82 | 0.0071   |
| CAMKV    | -1.82 | 0.0425   |
| ABHD14B  | -1.82 | 0.04369  |
| ERI3     | -1.81 | 0        |
| FKBP4    | -1.81 | 0        |
| NOP56    | -1.81 | 0        |
| OAF      | -1.81 | 0        |
| SLC25A4  | -1.81 | 0        |
| TTC27    | -1.8  | 0        |
| SLC39A10 | -1.8  | 1.00E-05 |
| NME4     | -1.79 | 0        |
| PDF      | -1.79 | 0.00011  |
| ZNF185   | -1.79 | 0.01349  |
| CIRH1A   | -1.78 | 0        |
| MARS2    | -1.78 | 0        |
| LRFN4    | -1.78 | 1.00E-05 |
| CXORF15  | -1.78 | 2.00E-05 |
| DTD1     | -1.77 | 0        |
| ELOVL6   | -1.77 | 0        |
| LY6E     | -1.77 | 0        |
| PFAS     | -1.77 | 0        |
| WDR18    | -1.77 | 0        |
| PRICKLE1 | -1.77 | 1.00E-05 |
| CHST12   | -1.77 | 3.00E-05 |
| NUBP2    | -1.77 | 0.00015  |
| MRM1     | -1.77 | 0.00224  |
| SLC38A5  | -1.76 | 0.00207  |
| TOMM20L  | -1.76 | 0.00995  |
| ASNS     | -1.75 | 0        |
| MYB      | -1.75 | 0        |
| FAM162A  | -1.75 | 1.00E-05 |
| HAGHL    | -1.75 | 2.00E-05 |
| FASN     | -1.74 | 0        |
| KIAA1804 | -1.74 | 0        |
| MTHFD1   | -1.74 | 0        |
| NUCB2    | -1.74 | 0        |
| NUDT7    | -1.74 | 0        |

|          |       |          |
|----------|-------|----------|
| REXO4    | -1.74 | 0        |
| PHOSPHO2 | -1.74 | 4.00E-05 |
| NUFIP1   | -1.74 | 9.00E-05 |
| MAGEC2   | -1.74 | 0.00051  |
| FAM86A   | -1.73 | 0        |
| LIN28B   | -1.73 | 0        |
| MRPS26   | -1.73 | 0        |
| SLC16A10 | -1.73 | 0        |
| SLC5A6   | -1.73 | 0        |
| CDCA7L   | -1.73 | 3.00E-05 |
| SOHLH2   | -1.73 | 5.00E-04 |
| ANKRD41  | -1.72 | 0        |
| CCDC34   | -1.72 | 0        |
| CLEC11A  | -1.72 | 0        |
| NUP88    | -1.72 | 0        |
| TDRD7    | -1.72 | 0        |
| UAP1     | -1.72 | 1.00E-05 |
| CDR2L    | -1.72 | 2.00E-05 |
| BZW2     | -1.71 | 0        |
| METTL1   | -1.71 | 0        |
| WDR4     | -1.71 | 0        |
| RCC1     | -1.71 | 3.00E-05 |
| ADAM6    | -1.71 | 0.00165  |
| BCAT1    | -1.7  | 0        |
| ENDOG    | -1.7  | 0        |
| PAFAH1B3 | -1.7  | 0        |
| RPL6     | -1.7  | 0        |
| SLC22A4  | -1.7  | 0        |
| SACS     | -1.7  | 1.00E-05 |
| TBC1D4   | -1.7  | 1.00E-05 |
| RET      | -1.7  | 2.00E-05 |
| STUB1    | -1.7  | 0.00097  |
| C12ORF66 | -1.7  | 0.00154  |
| C22ORF9  | -1.69 | 0        |
| NFE2L3   | -1.69 | 0        |
| IMPDH2   | -1.69 | 1.00E-05 |
| DEAF1    | -1.69 | 6.00E-05 |
| CCDC85B  | -1.69 | 0.00035  |
| BEND6    | -1.69 | 0.00045  |
| COQ3     | -1.68 | 0        |
| MEF2D    | -1.68 | 0        |

|          |       |          |
|----------|-------|----------|
| SPATA13  | -1.68 | 0.00501  |
| CSDA     | -1.67 | 0        |
| IRX3     | -1.67 | 0        |
| RUVBL2   | -1.67 | 0        |
| SETMAR   | -1.67 | 0        |
| TSPAN32  | -1.67 | 0        |
| TTLL12   | -1.67 | 0        |
| PYCRL    | -1.67 | 0.00019  |
| TBL3     | -1.67 | 0.00137  |
| TMEM45A  | -1.67 | 0.02074  |
| CA2      | -1.66 | 0        |
| LSM7     | -1.66 | 0        |
| NUDT16L1 | -1.66 | 0        |
| C7ORF40  | -1.66 | 1.00E-05 |
| MRPS2    | -1.66 | 4.00E-05 |
| C9ORF41  | -1.66 | 0.00011  |
| SEMA3A   | -1.66 | 0.00708  |
| ARL2     | -1.65 | 0        |
| CTNNAL1  | -1.65 | 0        |
| NOLA1    | -1.65 | 0        |
| SFXN4    | -1.65 | 0        |
| FARS2    | -1.65 | 1.00E-05 |
| CD300LG  | -1.65 | 0.01057  |
| ISG20L1  | -1.64 | 0        |
| PPAN     | -1.64 | 0        |
| SCAMP1   | -1.64 | 0        |
| TNFSF13B | -1.64 | 0        |
| SLC1A3   | -1.64 | 2.00E-05 |
| HOMER1   | -1.64 | 0.00075  |
| GPATCH4  | -1.63 | 0        |
| RUNDC3B  | -1.63 | 2.00E-05 |
| KIAA0133 | -1.63 | 0.00164  |
| AHCY     | -1.62 | 0        |
| GART     | -1.62 | 0        |
| PDCD5    | -1.62 | 0        |
| PHGDH    | -1.62 | 0        |
| RRS1     | -1.62 | 0        |
| TXNIP    | -1.62 | 0        |
| ZNF586   | -1.62 | 0        |
| FAM102B  | -1.62 | 1.00E-05 |
| SLC27A2  | -1.62 | 1.00E-05 |

|           |       |          |
|-----------|-------|----------|
| BEX1      | -1.62 | 1.00E-04 |
| HOTAIR    | -1.62 | 0.03415  |
| C7ORF65   | -1.62 | 0.03965  |
| CCRN4L    | -1.61 | 1.00E-05 |
| BLMH      | -1.61 | 2.00E-05 |
| QTRT1     | -1.61 | 2.00E-04 |
| ATAD3A    | -1.6  | 0        |
| ELP2      | -1.6  | 0        |
| FTSJ1     | -1.6  | 0        |
| RFTN1     | -1.6  | 0        |
| SORD      | -1.6  | 0        |
| GATA2     | -1.6  | 1.00E-05 |
| JUP       | -1.6  | 1.00E-05 |
| WDR27     | -1.6  | 3.00E-05 |
| TNS3      | -1.6  | 4.00E-05 |
| CGI-96    | -1.6  | 1.00E-04 |
| HIST2H2AC | -1.6  | 0.00029  |
| ACOT7     | -1.59 | 0        |
| ATXN10    | -1.59 | 0        |
| MRPL54    | -1.59 | 0        |
| AARSD1    | -1.59 | 1.00E-05 |
| RDH13     | -1.59 | 1.00E-05 |
| AAMP      | -1.59 | 0.00075  |
| HRSP12    | -1.58 | 0        |
| MRPL36    | -1.58 | 0        |
| REXO2     | -1.58 | 0        |
| POLR3D    | -1.58 | 1.00E-05 |
| ZNF92     | -1.58 | 0.03565  |
| SCO2      | -1.57 | 0        |
| KCTD15    | -1.57 | 1.00E-05 |
| COMTD1    | -1.57 | 5.00E-05 |
| BCL2L11   | -1.57 | 0.00015  |
| CARM1     | -1.56 | 0        |
| CCRK      | -1.56 | 0        |
| FYN       | -1.56 | 0        |
| SNORD96A  | -1.56 | 0.00022  |
| IMPACT    | -1.56 | 0.00064  |
| PDGFD     | -1.56 | 0.00327  |
| SNORD96B  | -1.56 | 0.00416  |
| POP1      | -1.55 | 0        |
| BYSL      | -1.55 | 1.00E-05 |

|                |       |          |
|----------------|-------|----------|
| C1QBP          | -1.55 | 2.00E-05 |
| B4GALT2        | -1.55 | 0.00022  |
| LPHN2          | -1.55 | 0.00061  |
| C10ORF125      | -1.55 | 0.00211  |
| MRPL4          | -1.54 | 0        |
| PEMT           | -1.54 | 0        |
| QDPR           | -1.54 | 0        |
| IPO13          | -1.54 | 1.00E-05 |
| POLR2I         | -1.54 | 1.00E-05 |
| SLC25A10       | -1.54 | 1.00E-05 |
| ABHD14A        | -1.54 | 3.00E-05 |
| POMT2          | -1.54 | 3.00E-05 |
| POLR1B         | -1.54 | 5.00E-05 |
| ASMTL          | -1.54 | 4.00E-04 |
| FARSB          | -1.54 | 0.00056  |
| DLX1           | -1.53 | 0        |
| KATNB1         | -1.53 | 0        |
| TARBP1         | -1.53 | 0        |
| TCFL5          | -1.53 | 0        |
| DKFZP686O24166 | -1.53 | 1.00E-05 |
| UHRF1          | -1.53 | 1.00E-05 |
| MINA           | -1.53 | 2.00E-05 |
| C8ORF38        | -1.53 | 3.00E-05 |
| SNORA84        | -1.53 | 0.00013  |
| KLHL35         | -1.53 | 0.00068  |
| KIAA0368       | -1.53 | 0.00094  |
| UGT2B11        | -1.53 | 0.00211  |
| DEFB122        | -1.53 | 0.01389  |
| BCAR4          | -1.53 | 0.01448  |
| MT1G           | -1.52 | 0        |
| NAT14          | -1.52 | 0        |
| AKR7A3         | -1.52 | 1.00E-05 |
| EIF3CL         | -1.52 | 2.00E-05 |
| ORM2           | -1.52 | 2.00E-05 |
| ZBTB44         | -1.52 | 2.00E-05 |
| C12ORF45       | -1.52 | 3.00E-05 |
| ZNF74          | -1.52 | 5.00E-05 |
| PATZ1          | -1.52 | 0.00031  |
| FERMT1         | -1.52 | 0.00409  |
| CYP27B1        | -1.52 | 0.00647  |
| PDXP           | -1.51 | 1.00E-05 |

|          |       |          |
|----------|-------|----------|
| PFKM     | -1.51 | 1.00E-05 |
| NLN      | -1.51 | 0.00011  |
| ACN9     | -1.5  | 0        |
| BCKDHB   | -1.5  | 0        |
| GNL3     | -1.5  | 0        |
| IRX5     | -1.5  | 0        |
| LRP3     | -1.5  | 0        |
| MFSD3    | -1.5  | 0        |
| MTP18    | -1.5  | 1.00E-05 |
| ORM1     | -1.5  | 1.00E-05 |
| XRCC6BP1 | -1.5  | 1.00E-05 |
| CCDC58   | -1.5  | 2.00E-05 |
| PRSS12   | -1.5  | 4.00E-05 |
| RPS21    | -1.5  | 7.00E-05 |
| EIF4EBP1 | -1.5  | 8.00E-05 |
| MGC35361 | -1.5  | 0.00013  |
| FSTL3    | -1.5  | 0.00893  |
| IGF2R    | 1.5   | 0        |
| RCSD1    | 1.5   | 1.00E-05 |
| TMEM175  | 1.5   | 1.00E-05 |
| HNMT     | 1.5   | 2.00E-05 |
| MTHFS    | 1.5   | 2.00E-05 |
| SFXN5    | 1.5   | 2.00E-05 |
| KIAA1598 | 1.5   | 5.00E-05 |
| LPHN3    | 1.5   | 0.00122  |
| CYTIP    | 1.5   | 0.00249  |
| ZFAND3   | 1.5   | 0.02012  |
| ZNF485   | 1.5   | 0.02642  |
| GRINA    | 1.51  | 0        |
| KCTD12   | 1.51  | 0        |
| ITGAV    | 1.51  | 1.00E-05 |
| KLF4     | 1.51  | 1.00E-05 |
| RNF149   | 1.51  | 1.00E-05 |
| PELI1    | 1.51  | 1.00E-04 |
| B3GNT8   | 1.52  | 2.00E-05 |
| MTHFR    | 1.52  | 0.00025  |
| KIAA1271 | 1.52  | 0.01134  |
| SDPR     | 1.52  | 0.0258   |
| OR51D1   | 1.52  | 0.03413  |
| NPL      | 1.53  | 0        |
| TANK     | 1.53  | 0        |

|           |      |          |
|-----------|------|----------|
| ENG       | 1.53 | 1.00E-05 |
| PSCD1     | 1.53 | 1.00E-05 |
| ALPK1     | 1.53 | 2.00E-05 |
| IRF1      | 1.53 | 3.00E-05 |
| SAMD9L    | 1.53 | 8.00E-05 |
| CASP7     | 1.53 | 0.00027  |
| MAP7      | 1.53 | 0.00952  |
| KRTAP10-1 | 1.53 | 0.04142  |
| IFNGR2    | 1.54 | 0        |
| ACOT11    | 1.54 | 1.00E-05 |
| ZC3H12A   | 1.54 | 2.00E-04 |
| FSTL5     | 1.54 | 0.0025   |
| KCNAB1    | 1.54 | 0.02587  |
| ATP6V1D   | 1.55 | 0        |
| MTMR3     | 1.55 | 0        |
| PFKFB4    | 1.55 | 0        |
| IL18BP    | 1.55 | 0.00015  |
| TIRAP     | 1.55 | 0.00337  |
| FURIN     | 1.55 | 0.0048   |
| RGS2      | 1.56 | 0        |
| CORO1B    | 1.56 | 3.00E-05 |
| PRDM1     | 1.56 | 0.00036  |
| PITPNA    | 1.56 | 0.01239  |
| GBGT1     | 1.57 | 0        |
| INPP1     | 1.57 | 0        |
| CTSH      | 1.57 | 1.00E-05 |
| GDI1      | 1.57 | 2.00E-05 |
| MAP1LC3B  | 1.57 | 4.00E-05 |
| ZCCHC24   | 1.57 | 8.00E-05 |
| MOBKL2C   | 1.57 | 0.00016  |
| SLC48A1   | 1.58 | 0        |
| DOK3      | 1.58 | 0.00069  |
| SMPD1     | 1.58 | 0.00135  |
| FER1L3    | 1.58 | 0.00335  |
| RGS14     | 1.58 | 0.02448  |
| LPP       | 1.59 | 0        |
| SH3BP1    | 1.59 | 0        |
| DMXL2     | 1.59 | 1.00E-05 |
| CXCL6     | 1.59 | 5.00E-05 |
| PLSCR1    | 1.59 | 0.00296  |
| TMEM187   | 1.59 | 0.00325  |



|            |      |          |
|------------|------|----------|
| EIF2C4     | 1.59 | 0.00592  |
| PLEKHF1    | 1.59 | 0.01424  |
| FAM151B    | 1.59 | 0.01537  |
| NOL3       | 1.59 | 0.03688  |
| GEM        | 1.59 | 0.04669  |
| HPCAL1     | 1.6  | 0        |
| EHD1       | 1.6  | 1.00E-05 |
| ELL2       | 1.6  | 2.00E-05 |
| CLOCK      | 1.6  | 7.00E-05 |
| SH3RF1     | 1.6  | 0.00011  |
| HRH1       | 1.6  | 0.00105  |
| SLCO2B1    | 1.6  | 0.00621  |
| RHOH       | 1.6  | 0.02049  |
| PAX8       | 1.6  | 0.03484  |
| CFLAR      | 1.61 | 0        |
| CTSA       | 1.61 | 1.00E-05 |
| TPK1       | 1.61 | 1.00E-05 |
| RNF19B     | 1.61 | 4.00E-05 |
| PPP2R2C    | 1.61 | 0.0147   |
| ESRRB      | 1.61 | 0.03035  |
| LPIN2      | 1.62 | 0        |
| DCUN1D3    | 1.62 | 2.00E-05 |
| DENND4B    | 1.62 | 2.00E-05 |
| CNTNAP4    | 1.62 | 3.00E-05 |
| GPR162     | 1.62 | 4.00E-05 |
| C10ORF118  | 1.62 | 0.00118  |
| FAM134B    | 1.63 | 0        |
| IL10RB     | 1.63 | 0        |
| SQRDL      | 1.63 | 2.00E-05 |
| TMTC1      | 1.63 | 7.00E-05 |
| C9ORF72    | 1.63 | 0.00084  |
| C9ORF103   | 1.63 | 0.02452  |
| RNU1G2     | 1.64 | 0        |
| RABGAP1    | 1.64 | 0.00021  |
| CSGALNACT2 | 1.64 | 0.00023  |
| TTY1       | 1.64 | 0.00949  |
| FUCA1      | 1.65 | 0        |
| TMEM144    | 1.65 | 2.00E-05 |
| DNHL1      | 1.65 | 0.02201  |
| ANKRD22    | 1.66 | 0        |
| HIF1A      | 1.66 | 0        |

|           |      |          |
|-----------|------|----------|
| ENC1      | 1.66 | 3.00E-05 |
| SRA1      | 1.66 | 3.00E-05 |
| B3GNT5    | 1.66 | 0.00012  |
| MITF      | 1.66 | 0.0018   |
| PHC2      | 1.66 | 0.00383  |
| NOTCH1    | 1.67 | 0        |
| WDR26     | 1.67 | 1.00E-05 |
| C11ORF75  | 1.67 | 2.00E-05 |
| EEPD1     | 1.67 | 4.00E-05 |
| NPHP3     | 1.67 | 2.00E-04 |
| PCAF      | 1.67 | 0.03175  |
| GRN       | 1.68 | 0        |
| LACTB     | 1.68 | 0        |
| RNU1-3    | 1.68 | 0        |
| CCDC126   | 1.68 | 1.00E-05 |
| IRF9      | 1.68 | 2.00E-05 |
| ZNF514    | 1.68 | 0.00013  |
| HSD17B13  | 1.68 | 0.00032  |
| PLXDC2    | 1.68 | 0.0127   |
| OSGIN2    | 1.69 | 0        |
| GALNT12   | 1.69 | 0.00466  |
| SLC38A6   | 1.7  | 0        |
| CHD2      | 1.7  | 3.00E-05 |
| DNAH1     | 1.7  | 0.00024  |
| CD55      | 1.7  | 0.00027  |
| CALHM2    | 1.7  | 0.00039  |
| MX2       | 1.7  | 0.01214  |
| ARHGAP24  | 1.7  | 0.01219  |
| EVPL      | 1.7  | 0.04962  |
| IFNGR1    | 1.71 | 0        |
| SRXN1     | 1.71 | 0        |
| IQCG      | 1.71 | 0.00041  |
| TNFAIP8L3 | 1.71 | 0.00349  |
| C12ORF35  | 1.72 | 0        |
| CLIP1     | 1.72 | 0        |
| KLF2      | 1.72 | 1.00E-05 |
| FMO5      | 1.72 | 0.00021  |
| SLC6A12   | 1.72 | 0.02221  |
| BMP2K     | 1.73 | 0        |
| FCRLB     | 1.73 | 0        |
| MTF1      | 1.73 | 0        |

|           |      |          |
|-----------|------|----------|
| RAX2      | 1.73 | 0.02518  |
| MGC3771   | 1.73 | 0.04565  |
| RN7SK     | 1.74 | 0        |
| RNU1-5    | 1.74 | 1.00E-05 |
| ACP2      | 1.74 | 0.00017  |
| NOTCH2    | 1.74 | 0.00061  |
| C19ORF66  | 1.74 | 0.00086  |
| HTR7      | 1.74 | 0.00719  |
| PCTK1     | 1.74 | 0.02616  |
| CLIC2     | 1.74 | 0.03905  |
| KCTD7     | 1.74 | 0.04794  |
| POR       | 1.75 | 0        |
| DYNLT3    | 1.75 | 1.00E-05 |
| RHBDD2    | 1.75 | 1.00E-05 |
| SLC5A3    | 1.75 | 0.00578  |
| KLHDC7A   | 1.75 | 0.00924  |
| KRT37     | 1.75 | 0.01132  |
| PMAIP1    | 1.76 | 0        |
| CCL23     | 1.76 | 1.00E-05 |
| TMEM87B   | 1.76 | 0.00112  |
| ROBO2     | 1.76 | 0.00643  |
| C5        | 1.76 | 0.02642  |
| OR3A1     | 1.76 | 0.03979  |
| TTYH3     | 1.77 | 0        |
| LGALS12   | 1.77 | 0.00026  |
| ZFP36L1   | 1.78 | 2.00E-05 |
| MAPK13    | 1.78 | 0.00093  |
| SPTA1     | 1.78 | 0.02425  |
| PRR7      | 1.78 | 0.04034  |
| HIST1H2BK | 1.79 | 0        |
| NPC1      | 1.79 | 0        |
| TGFBR2    | 1.79 | 0        |
| CYTH1     | 1.79 | 1.00E-05 |
| F11R      | 1.79 | 1.00E-05 |
| NQO2      | 1.79 | 3.00E-05 |
| FLJ10996  | 1.79 | 0.00324  |
| GOLGA9P   | 1.79 | 0.04175  |
| CCND3     | 1.8  | 0        |
| KRCC1     | 1.8  | 0        |
| GK        | 1.8  | 1.00E-05 |
| TAAR9     | 1.8  | 0.0146   |

|          |      |          |
|----------|------|----------|
| BHLHB2   | 1.81 | 0        |
| CCDC92   | 1.81 | 0.00136  |
| GARNL4   | 1.81 | 0.00185  |
| TMEM91   | 1.81 | 0.00645  |
| SDS      | 1.81 | 0.02633  |
| PTPRG    | 1.81 | 0.0423   |
| PLD3     | 1.82 | 0        |
| FOS      | 1.82 | 1.00E-05 |
| OSBPL11  | 1.82 | 2.00E-05 |
| YPEL5    | 1.82 | 2.00E-05 |
| ANTXR2   | 1.83 | 0        |
| SLC36A1  | 1.83 | 0        |
| FLJ20489 | 1.83 | 6.00E-05 |
| NTSR1    | 1.83 | 0.00012  |
| ANK2     | 1.83 | 0.03369  |
| TECPR1   | 1.84 | 0        |
| CD1D     | 1.84 | 2.00E-05 |
| AMELY    | 1.84 | 0.01581  |
| CCDC147  | 1.85 | 0        |
| HEXB     | 1.85 | 0        |
| TNF      | 1.85 | 0        |
| BST1     | 1.85 | 1.00E-05 |
| LMO3     | 1.85 | 0.01799  |
| CTSB     | 1.86 | 0        |
| DOCK10   | 1.86 | 0        |
| S100A6   | 1.86 | 0        |
| ADAM17   | 1.86 | 1.00E-05 |
| PTAFR    | 1.86 | 0.00041  |
| ACOX2    | 1.86 | 0.00097  |
| C2CD2L   | 1.86 | 0.00159  |
| CIDECP   | 1.86 | 0.00674  |
| CAPN10   | 1.86 | 0.01312  |
| ARHGAP27 | 1.87 | 0        |
| FGD3     | 1.87 | 0        |
| CDA      | 1.87 | 8.00E-04 |
| PCDHGA3  | 1.87 | 0.03503  |
| CD300LF  | 1.88 | 0        |
| DDIT3    | 1.88 | 0        |
| ANXA1    | 1.88 | 3.00E-05 |
| PML      | 1.88 | 0.04573  |
| C1ORF162 | 1.89 | 0        |

|           |      |          |
|-----------|------|----------|
| LRP10     | 1.89 | 0        |
| LTB4R     | 1.89 | 0        |
| NFKBIL1   | 1.89 | 0.04289  |
| FERMT3    | 1.9  | 0        |
| TOM1      | 1.9  | 0        |
| MXD1      | 1.9  | 2.00E-05 |
| TRIM38    | 1.9  | 5.00E-05 |
| CTSK      | 1.9  | 0.00058  |
| CART1     | 1.9  | 0.01511  |
| TBC1D2    | 1.9  | 0.01581  |
| NAGK      | 1.91 | 0        |
| SAT1      | 1.91 | 0        |
| C9ORF164  | 1.91 | 0.00106  |
| LYG1      | 1.91 | 0.03484  |
| PSAP      | 1.92 | 0        |
| MMP25     | 1.92 | 1.00E-05 |
| SLC44A2   | 1.92 | 1.00E-05 |
| PAX3      | 1.92 | 0.00651  |
| TFF2      | 1.92 | 0.0306   |
| CPD       | 1.93 | 0        |
| DNAJB2    | 1.93 | 0        |
| DPYD      | 1.93 | 0        |
| NINJ2     | 1.93 | 0        |
| SYTL3     | 1.93 | 2.00E-05 |
| NFKB2     | 1.93 | 0.00013  |
| YPEL3     | 1.93 | 0.00224  |
| AMICA1    | 1.93 | 0.00884  |
| FBXL14    | 1.93 | 0.04565  |
| HILS1     | 1.93 | 0.04567  |
| KIAA0913  | 1.94 | 0        |
| PTPRE     | 1.94 | 0        |
| TNFRSF10D | 1.94 | 0.00263  |
| DOPEY1    | 1.94 | 0.01114  |
| PIR       | 1.95 | 0        |
| SYNJ1     | 1.95 | 0        |
| RHOBTB3   | 1.95 | 2.00E-05 |
| SERTAD1   | 1.96 | 0        |
| SIGLEC7   | 1.96 | 0.00012  |
| CRYL1     | 1.96 | 0.00016  |
| DYSF      | 1.96 | 0.02585  |
| ASTL      | 1.96 | 0.02589  |

|          |      |          |
|----------|------|----------|
| ADORA3   | 1.97 | 0        |
| NID2     | 1.97 | 0.03568  |
| STK40    | 1.98 | 0        |
| BLVRB    | 1.98 | 1.00E-05 |
| PDGFRL   | 1.98 | 7.00E-05 |
| LGALS3   | 1.98 | 0.00057  |
| EGF      | 1.98 | 0.01757  |
| ASB2     | 1.98 | 0.0189   |
| SNORA28  | 1.98 | 0.02917  |
| DENND4C  | 2    | 0        |
| KLF6     | 2    | 0        |
| NRCAM    | 2    | 0.041    |
| TPP1     | 2.01 | 0        |
| HIP1     | 2.01 | 1.00E-05 |
| NMT2     | 2.01 | 6.00E-05 |
| COL9A2   | 2.01 | 0.0026   |
| STX11    | 2.02 | 0        |
| ACPP     | 2.02 | 1.00E-04 |
| VSIG1    | 2.02 | 0.03971  |
| APLP2    | 2.03 | 0        |
| PHCA     | 2.03 | 0        |
| PDLIM5   | 2.03 | 3.00E-04 |
| PTPRC    | 2.04 | 0        |
| PBX3     | 2.04 | 1.00E-05 |
| MR1      | 2.05 | 0        |
| POLD4    | 2.05 | 0.01755  |
| FAM171B  | 2.05 | 0.03943  |
| TMC6     | 2.06 | 0        |
| TMEM127  | 2.06 | 1.00E-05 |
| MYO5C    | 2.06 | 0.00336  |
| RHOB     | 2.06 | 0.01693  |
| IGSF6    | 2.06 | 0.04401  |
| KIAA1370 | 2.07 | 0        |
| S100A4   | 2.07 | 0        |
| PECR     | 2.07 | 2.00E-05 |
| KLF10    | 2.07 | 3.00E-05 |
| ZNF433   | 2.07 | 0.04046  |
| ADAM9    | 2.08 | 0        |
| EMR4P    | 2.08 | 0.00012  |
| CYTH4    | 2.08 | 5.00E-04 |
| BAG3     | 2.09 | 0        |

|          |      |          |
|----------|------|----------|
| NAMPT    | 2.09 | 0        |
| SPPL2A   | 2.09 | 0        |
| STXBP5   | 2.09 | 0        |
| FAM104B  | 2.09 | 0.00058  |
| FAM151A  | 2.09 | 0.00478  |
| IFI6     | 2.1  | 0        |
| NEU1     | 2.1  | 0        |
| PTPN22   | 2.1  | 0        |
| RN5S9    | 2.1  | 0        |
| HS1BP3   | 2.1  | 0.00036  |
| ATP7A    | 2.1  | 0.00198  |
| LITAF    | 2.11 | 0        |
| LRG1     | 2.11 | 0        |
| PANX2    | 2.11 | 0        |
| ICAM3    | 2.12 | 0        |
| TNFSF9   | 2.12 | 2.00E-05 |
| SIGLEC9  | 2.12 | 0.04201  |
| ARHGAP12 | 2.13 | 0        |
| OSTM1    | 2.13 | 0        |
| PNPLA1   | 2.13 | 2.00E-05 |
| SIGLEC14 | 2.13 | 0.01167  |
| GPR137B  | 2.14 | 3.00E-05 |
| CLCF1    | 2.14 | 4.00E-05 |
| AXUD1    | 2.15 | 0        |
| RELB     | 2.15 | 0        |
| EVI2A    | 2.15 | 1.00E-05 |
| ECM1     | 2.15 | 4.00E-05 |
| MVP      | 2.15 | 0.00015  |
| PDE6H    | 2.16 | 0.00353  |
| NPR2     | 2.16 | 0.00576  |
| ATP6V0A1 | 2.17 | 0        |
| HSF4     | 2.17 | 0.01433  |
| CYP17A1  | 2.17 | 0.01603  |
| RAB31    | 2.18 | 0        |
| SDCBP    | 2.18 | 0        |
| TGFBR1   | 2.18 | 0.02593  |
| RHBDL2   | 2.18 | 0.03799  |
| ACSL1    | 2.19 | 0        |
| CCPG1    | 2.19 | 0        |
| BATF     | 2.19 | 7.00E-05 |
| CTSO     | 2.2  | 0.00524  |

|           |      |          |
|-----------|------|----------|
| AADAACL1  | 2.21 | 0        |
| SNORD3C   | 2.21 | 0.00016  |
| GUCA1B    | 2.21 | 0.00041  |
| RHBDF1    | 2.21 | 0.00238  |
| ANXA5     | 2.22 | 0        |
| SECISBP2L | 2.22 | 0        |
| SMOX      | 2.22 | 0        |
| MAPRE3    | 2.22 | 0.01795  |
| IL6ST     | 2.22 | 0.04625  |
| FYB       | 2.23 | 0.00016  |
| TIMP2     | 2.23 | 0.00023  |
| SDSL      | 2.23 | 0.00041  |
| HPD       | 2.23 | 0.00104  |
| GIMAP4    | 2.23 | 0.02319  |
| TRIB2     | 2.24 | 0        |
| MYO5A     | 2.25 | 0        |
| PRKCB     | 2.26 | 0        |
| GPR82     | 2.26 | 0.01355  |
| ADCY4     | 2.26 | 0.04285  |
| SERPINB1  | 2.27 | 0        |
| PKD2L1    | 2.27 | 0.01221  |
| GAS7      | 2.28 | 0        |
| NOD2      | 2.28 | 0.00327  |
| ABTB1     | 2.28 | 0.00781  |
| SLC38A3   | 2.28 | 0.03778  |
| PECAM1    | 2.29 | 0        |
| PRKCB1    | 2.29 | 0        |
| PSCD4     | 2.29 | 0        |
| APOB48R   | 2.29 | 2.00E-05 |
| ZNF397    | 2.29 | 0.01327  |
| FTHL2     | 2.29 | 0.03467  |
| CD53      | 2.3  | 0        |
| NCF1B     | 2.3  | 0.00064  |
| SRC       | 2.3  | 0.04489  |
| ARHGAP9   | 2.31 | 0        |
| MCOLN1    | 2.31 | 1.00E-05 |
| CDS1      | 2.31 | 0.00878  |
| CPEB4     | 2.33 | 7.00E-05 |
| RAB7B     | 2.33 | 1.00E-04 |
| PH-4      | 2.33 | 0.0146   |
| ZMYND11   | 2.33 | 0.02593  |



|           |      |          |
|-----------|------|----------|
| ORAI3     | 2.33 | 0.0368   |
| GBP2      | 2.34 | 0        |
| KAT2B     | 2.34 | 0        |
| NLRP12    | 2.34 | 1.00E-05 |
| RAB20     | 2.34 | 1.00E-05 |
| ICAM1     | 2.34 | 6.00E-04 |
| MSC       | 2.34 | 0.0139   |
| GLRX      | 2.35 | 0        |
| PDLIM7    | 2.35 | 2.00E-05 |
| C2ORF58   | 2.35 | 0.00011  |
| ARRDC3    | 2.35 | 0.00247  |
| G6PD      | 2.36 | 0        |
| BEST1     | 2.36 | 0.00035  |
| LSP1      | 2.37 | 0        |
| MGAM      | 2.37 | 0.00044  |
| PLEKHG2   | 2.37 | 0.01506  |
| KIAA0247  | 2.38 | 0        |
| IRS1      | 2.38 | 0.03997  |
| C3AR1     | 2.39 | 0        |
| IL4R      | 2.39 | 0        |
| ASRGL1    | 2.39 | 1.00E-05 |
| ANKDD1A   | 2.39 | 2.00E-05 |
| FRMD7     | 2.39 | 0.00674  |
| TLR6      | 2.4  | 0.00084  |
| C1ORF183  | 2.4  | 0.02246  |
| LAPTM5    | 2.41 | 0        |
| TNFAIP6   | 2.41 | 0        |
| TPCN1     | 2.41 | 0.00217  |
| CAMSAP1L1 | 2.41 | 0.00632  |
| C12ORF59  | 2.43 | 3.00E-05 |
| SRGAP1    | 2.43 | 0.00082  |
| WDR31     | 2.43 | 0.02351  |
| RIT1      | 2.44 | 0        |
| DEFB115   | 2.44 | 0.04626  |
| RSPH3     | 2.45 | 2.00E-05 |
| TMEM169   | 2.45 | 0.03114  |
| AIM2      | 2.46 | 1.00E-05 |
| PLXNC1    | 2.46 | 0.00556  |
| GABARAPL1 | 2.47 | 0        |
| ID2       | 2.47 | 0        |
| TMOD2     | 2.47 | 0.00758  |

|          |      |          |
|----------|------|----------|
| FLRT2    | 2.47 | 0.02116  |
| KCNB2    | 2.47 | 0.02433  |
| P2RY13   | 2.48 | 0.02707  |
| OSCAR    | 2.49 | 0        |
| PGD      | 2.49 | 0        |
| SH3BGRL3 | 2.49 | 0        |
| SLC15A3  | 2.49 | 0        |
| PTGS1    | 2.49 | 1.00E-05 |
| DENND2D  | 2.49 | 0.02099  |
| LAT      | 2.5  | 0        |
| OXGR1    | 2.51 | 0.02769  |
| CMTM1    | 2.52 | 0        |
| LGALS1   | 2.52 | 0        |
| SERPINB2 | 2.52 | 0        |
| ADAM8    | 2.52 | 8.00E-05 |
| RGPD1    | 2.52 | 0.00048  |
| COL15A1  | 2.52 | 0.01375  |
| CA10     | 2.52 | 0.02538  |
| DNASE2   | 2.53 | 0.00017  |
| MAFF     | 2.54 | 0        |
| PSTPIP1  | 2.54 | 1.00E-04 |
| ENPP2    | 2.54 | 0.00028  |
| BRI3     | 2.55 | 0        |
| HK1      | 2.55 | 0        |
| NINJ1    | 2.55 | 0        |
| CTNNA1   | 2.55 | 6.00E-05 |
| SIGLECP3 | 2.55 | 0.00039  |
| TRAF3IP3 | 2.56 | 1.00E-05 |
| EID3     | 2.56 | 0.00077  |
| GBP3     | 2.56 | 0.00154  |
| GRPR     | 2.56 | 0.00261  |
| LILRB2   | 2.56 | 0.00324  |
| IGSF2    | 2.56 | 0.01395  |
| SLC2A5   | 2.57 | 0        |
| APOBEC3B | 2.57 | 0.01404  |
| CD37     | 2.57 | 0.01615  |
| PPP1R15A | 2.59 | 0        |
| SDC4     | 2.59 | 0.01392  |
| MIR23B   | 2.59 | 0.03907  |
| CYP1B1   | 2.6  | 0        |
| GLIPR2   | 2.6  | 0        |

|          |      |          |
|----------|------|----------|
| HBEGF    | 2.6  | 0        |
| DUSP18   | 2.6  | 0.00143  |
| HCK      | 2.61 | 0        |
| PLEKHO2  | 2.61 | 0        |
| NPB      | 2.61 | 0.02953  |
| RASGRP1  | 2.62 | 0.02082  |
| SLC25A24 | 2.63 | 0        |
| TFE3     | 2.63 | 1.00E-05 |
| ITPKA    | 2.64 | 0        |
| MFSD6    | 2.64 | 0        |
| DDX60L   | 2.65 | 0        |
| IL10RA   | 2.66 | 0        |
| VWA5A    | 2.66 | 2.00E-05 |
| IQSEC1   | 2.66 | 0.00551  |
| NPVF     | 2.66 | 0.01457  |
| DOK2     | 2.67 | 0        |
| GLIPR1   | 2.68 | 0        |
| CUEDC1   | 2.68 | 1.00E-05 |
| MIR1275  | 2.7  | 0.00119  |
| GPR84    | 2.71 | 0        |
| MAP3K8   | 2.71 | 1.00E-05 |
| ARX      | 2.71 | 0.01151  |
| AP1S2    | 2.72 | 0        |
| SASH3    | 2.72 | 1.00E-05 |
| PDE1B    | 2.72 | 0.00067  |
| EFCAB1   | 2.72 | 0.00724  |
| TLR1     | 2.73 | 1.00E-05 |
| CD300C   | 2.74 | 0        |
| HIPK2    | 2.74 | 0        |
| RGS1     | 2.74 | 0        |
| SLC31A2  | 2.74 | 0        |
| SLC6A6   | 2.74 | 0        |
| ARAP3    | 2.75 | 0        |
| MIR302C  | 2.75 | 0        |
| PPARG    | 2.75 | 0        |
| CDKN2B   | 2.75 | 1.00E-05 |
| PLP2     | 2.75 | 1.00E-05 |
| SLC12A6  | 2.75 | 0.00016  |
| CLDN7    | 2.75 | 0.01495  |
| ARHGAP18 | 2.76 | 0        |
| CD58     | 2.76 | 0        |

|          |      |          |
|----------|------|----------|
| PLUNC    | 2.76 | 0.03677  |
| CTSL1    | 2.77 | 0        |
| IFI16    | 2.77 | 0        |
| ABHD4    | 2.78 | 0.00201  |
| F5       | 2.78 | 0.0236   |
| SLC11A1  | 2.78 | 0.02764  |
| SP140    | 2.81 | 2.00E-05 |
| C10ORF53 | 2.81 | 0.00976  |
| CD68     | 2.83 | 0        |
| SULF2    | 2.83 | 8.00E-05 |
| CD163    | 2.84 | 0.00072  |
| DUSP5    | 2.85 | 0        |
| IFIT2    | 2.85 | 0.00105  |
| FILIP1L  | 2.87 | 0        |
| CSF1R    | 2.88 | 0        |
| EMR2     | 2.89 | 0        |
| ALOX5AP  | 2.9  | 0        |
| ADORA2A  | 2.91 | 0        |
| NPC2     | 2.91 | 0        |
| ARHGAP26 | 2.92 | 2.00E-05 |
| CXCL2    | 2.92 | 0.00253  |
| SLC7A7   | 2.93 | 0        |
| TLR8     | 2.93 | 0.00467  |
| PRKACA   | 2.94 | 0.00728  |
| CEBPB    | 2.95 | 0        |
| CYBB     | 2.96 | 0        |
| SH3BP2   | 2.96 | 0.00022  |
| LPAR1    | 2.96 | 0.00093  |
| SNX12    | 2.96 | 0.02612  |
| BCL3     | 2.97 | 0        |
| CFP      | 2.97 | 0.00309  |
| C9ORF89  | 3    | 0        |
| NQO1     | 3.01 | 0        |
| VCY      | 3.01 | 0.02364  |
| CACNA2D4 | 3.02 | 0        |
| KYNU     | 3.02 | 0        |
| CLEC4A   | 3.02 | 8.00E-05 |
| CCR1     | 3.03 | 0        |
| TNFRSF14 | 3.04 | 0        |
| YAP1     | 3.04 | 0.00327  |
| BOK      | 3.05 | 0        |

|            |      |          |
|------------|------|----------|
| DUSP6      | 3.05 | 0        |
| FTHL12     | 3.05 | 0        |
| PILRA      | 3.06 | 0        |
| SNORD3D    | 3.06 | 0        |
| CLCNKA     | 3.06 | 0.01402  |
| SLC2A6     | 3.09 | 1.00E-05 |
| DSE        | 3.11 | 3.00E-05 |
| SEMA6B     | 3.11 | 4.00E-05 |
| CD36       | 3.12 | 0.00086  |
| SPDYE1     | 3.13 | 0.04757  |
| ACER3      | 3.14 | 1.00E-05 |
| DISP1      | 3.14 | 0.00295  |
| NCRNA00085 | 3.14 | 0.00457  |
| SERPINA1   | 3.15 | 0.00014  |
| HPSE       | 3.16 | 0.00052  |
| FTHL7      | 3.17 | 0        |
| HSPA1L     | 3.18 | 0.0126   |
| ERMN       | 3.18 | 0.03503  |
| FPR2       | 3.19 | 0.01822  |
| STX1A      | 3.2  | 1.00E-05 |
| CCDC88B    | 3.2  | 2.00E-05 |
| ZNF697     | 3.2  | 0.00021  |
| MEGF9      | 3.22 | 0        |
| ARHGEF3    | 3.23 | 0.02449  |
| SNORD113-4 | 3.24 | 0.01682  |
| CCDC149    | 3.25 | 0.00076  |
| PKIB       | 3.25 | 0.01548  |
| OR8H1      | 3.26 | 0.02554  |
| SLC9A9     | 3.26 | 0.04558  |
| IL8        | 3.27 | 0        |
| COL7A1     | 3.27 | 0.0114   |
| F3         | 3.29 | 0        |
| SYDE1      | 3.29 | 0.00452  |
| FTHL11     | 3.3  | 0        |
| C16ORF7    | 3.3  | 0.00639  |
| FLJ21687   | 3.3  | 0.02735  |
| WIP1       | 3.31 | 0.00212  |
| CD86       | 3.32 | 0        |
| SIRPB1     | 3.33 | 7.00E-05 |
| CHI3L1     | 3.34 | 0        |
| PNOC       | 3.34 | 0.00164  |

|          |      |          |
|----------|------|----------|
| FOXF1    | 3.34 | 0.002    |
| TMEM140  | 3.35 | 0.02768  |
| DHRS3    | 3.36 | 0.00664  |
| ACVR1    | 3.38 | 0        |
| WSB2     | 3.39 | 1.00E-05 |
| DOCK5    | 3.39 | 2.00E-04 |
| ITGB5    | 3.39 | 0.01984  |
| B4GALNT1 | 3.4  | 7.00E-05 |
| SLC16A6  | 3.4  | 0.00037  |
| KITLG    | 3.4  | 4.00E-04 |
| METTL8   | 3.4  | 0.0178   |
| CTSD     | 3.41 | 0        |
| SQSTM1   | 3.41 | 0        |
| FTHL3    | 3.42 | 0        |
| RBM47    | 3.43 | 0        |
| CCDC129  | 3.43 | 0.01269  |
| SUCNR1   | 3.45 | 0        |
| FTH1     | 3.46 | 0        |
| TYROBP   | 3.46 | 0        |
| LILRA5   | 3.46 | 0.00046  |
| PLIN2    | 3.49 | 0        |
| FMO4     | 3.49 | 0.00093  |
| ABHD8    | 3.5  | 0        |
| GPNMB    | 3.5  | 3.00E-05 |
| PTGS2    | 3.51 | 1.00E-05 |
| TMEM151A | 3.51 | 0.01074  |
| MIR943   | 3.51 | 0.02934  |
| KIAA1618 | 3.54 | 2.00E-05 |
| NLRC4    | 3.54 | 6.00E-05 |
| FCHO2    | 3.54 | 0.03137  |
| ADM      | 3.55 | 0        |
| TNFAIP2  | 3.56 | 0        |
| KRT80    | 3.56 | 0.00015  |
| SPCS2    | 3.56 | 0.04688  |
| IRAK2    | 3.57 | 1.00E-05 |
| C19ORF59 | 3.58 | 0        |
| RGL1     | 3.58 | 0        |
| GALR3    | 3.58 | 0.00311  |
| EFNB2    | 3.6  | 1.00E-05 |
| CYP4B1   | 3.65 | 0        |
| GATS     | 3.65 | 0        |

|           |      |          |
|-----------|------|----------|
| C15ORF52  | 3.67 | 1.00E-05 |
| NFKBIZ    | 3.67 | 1.00E-05 |
| IDUA      | 3.67 | 0.00145  |
| FCGRT     | 3.69 | 0        |
| LY96      | 3.7  | 0        |
| TIMP1     | 3.71 | 0        |
| ALOX5     | 3.72 | 0        |
| CAPG      | 3.72 | 0        |
| CD300A    | 3.72 | 3.00E-05 |
| LFNG      | 3.74 | 0        |
| CCL4L1    | 3.75 | 2.00E-05 |
| MIR548L   | 3.75 | 0.04803  |
| CR1       | 3.79 | 2.00E-04 |
| DHRS9     | 3.8  | 0        |
| SIPA1L2   | 3.8  | 0        |
| MTMR7     | 3.8  | 0.00103  |
| UPB1      | 3.81 | 0.00023  |
| C1RL      | 3.84 | 0.00084  |
| FLJ42986  | 3.85 | 0        |
| KCNA4     | 3.87 | 0.00309  |
| SLA       | 3.89 | 0        |
| TMEM71    | 3.89 | 4.00E-05 |
| C17ORF91  | 3.89 | 0.00292  |
| ZDHHC1    | 3.89 | 0.03325  |
| ANKRD33   | 3.9  | 0        |
| HIST1H2BD | 3.91 | 0.0221   |
| IER5L     | 3.92 | 2.00E-05 |
| UPP1      | 3.92 | 0.00047  |
| OSM       | 3.93 | 3.00E-05 |
| GPR34     | 3.94 | 3.00E-05 |
| FCER1G    | 3.99 | 0        |
| SIGLEC16  | 4.01 | 0.00429  |
| PTPRO     | 4.02 | 0        |
| TNFRSF12A | 4.02 | 0.00016  |
| ADAP2     | 4.03 | 0        |
| TM4SF19   | 4.03 | 0.00228  |
| S100A12   | 4.04 | 0.00266  |
| BTG2      | 4.07 | 0        |
| SLC43A2   | 4.07 | 7.00E-05 |
| CD38      | 4.07 | 0.00088  |
| SLC22A18  | 4.08 | 0.00714  |

|          |      |          |
|----------|------|----------|
| A4GALT   | 4.08 | 0.01583  |
| SLC16A14 | 4.09 | 0.0016   |
| PDGFA    | 4.11 | 0.03756  |
| FLJ20273 | 4.12 | 0        |
| HK3      | 4.12 | 0.006    |
| TBXAS1   | 4.13 | 0        |
| JUN      | 4.16 | 0        |
| NRP1     | 4.17 | 0        |
| ZNF467   | 4.19 | 0.00261  |
| CLEC5A   | 4.21 | 0        |
| OSGIN1   | 4.22 | 8.00E-05 |
| FAM129B  | 4.25 | 0        |
| SGK1     | 4.25 | 0        |
| HP       | 4.27 | 0        |
| MMP9     | 4.29 | 0.00068  |
| HMOX1    | 4.34 | 0        |
| IL18R1   | 4.38 | 7.00E-05 |
| C10ORF54 | 4.41 | 0        |
| FAM20C   | 4.47 | 0.00266  |
| TNNI2    | 4.48 | 0.00381  |
| SLC47A2  | 4.48 | 0.00839  |
| LAMB3    | 4.48 | 0.02805  |
| CCRL2    | 4.5  | 0.00268  |
| C13ORF31 | 4.52 | 0        |
| SLC2A3   | 4.52 | 0        |
| TTY16    | 4.52 | 0.00191  |
| EGR1     | 4.53 | 0        |
| SPOCD1   | 4.53 | 0.01307  |
| ITGAX    | 4.55 | 0.01101  |
| SCN2A    | 4.59 | 0.01655  |
| OKL38    | 4.61 | 0        |
| FPR1     | 4.61 | 0.00599  |
| FLOT1    | 4.62 | 0        |
| CXCL16   | 4.62 | 9.00E-05 |
| CAMK2D   | 4.62 | 0.00858  |
| SGK      | 4.63 | 0        |
| KIAA1539 | 4.64 | 0.00019  |
| BCL6     | 4.65 | 0        |
| KIAA0513 | 4.67 | 8.00E-05 |
| EGR2     | 4.68 | 1.00E-05 |
| PLCB2    | 4.69 | 0        |



|             |      |          |
|-------------|------|----------|
| ERBB4       | 4.71 | 0.00604  |
| CCL20       | 4.73 | 0        |
| SLC2A14     | 4.74 | 0.04561  |
| TBC1D9      | 4.75 | 0.02584  |
| CENTD1      | 4.8  | 0.00229  |
| SLC26A11    | 4.89 | 0.00028  |
| CCL3        | 4.95 | 1.00E-05 |
| AGPAT9      | 4.97 | 0        |
| CDKN1A      | 4.97 | 0        |
| BBS12       | 5    | 0.03233  |
| OLR1        | 5.03 | 1.00E-05 |
| GPR39       | 5.11 | 0.00346  |
| HOM-TES-103 | 5.15 | 0.01045  |
| LRRC25      | 5.19 | 0.00136  |
| FLJ12684    | 5.26 | 0.00326  |
| GNG2        | 5.27 | 0.00308  |
| S100A8      | 5.34 | 0        |
| S100A9      | 5.37 | 0        |
| SLC22A18AS  | 5.41 | 5.00E-05 |
| C5AR1       | 5.41 | 8.00E-05 |
| AKR1C3      | 5.41 | 1.00E-04 |
| NNMT        | 5.54 | 0.03655  |
| TMEM158     | 5.58 | 0        |
| GDF15       | 5.59 | 0.00088  |
| NCF1C       | 5.6  | 0        |
| NCF2        | 5.63 | 0        |
| HAVCR2      | 5.69 | 0        |
| EMP1        | 5.7  | 0        |
| SPP1        | 5.71 | 0        |
| IFI30       | 5.71 | 3.00E-05 |
| RASGRP3     | 5.72 | 5.00E-05 |
| NCF1        | 5.75 | 1.00E-05 |
| PDX1        | 5.79 | 0.02134  |
| ABCC3       | 5.88 | 0.02084  |
| FOLR3       | 5.91 | 2.00E-05 |
| MERTK       | 5.99 | 0        |
| ITGAM       | 6    | 0        |
| IER3        | 6.01 | 0        |
| IL18RAP     | 6.01 | 1.00E-05 |
| PHLDA1      | 6.02 | 0        |
| CTSZ        | 6.08 | 0.00944  |

|        |      |          |
|--------|------|----------|
| CCL3L3 | 6.24 | 0        |
| FGR    | 6.28 | 0        |
| CD14   | 6.31 | 0        |
| THBS1  | 6.78 | 0.00074  |
| TM6SF1 | 6.82 | 0.00031  |
| RENBP  | 6.88 | 0.00941  |
| CCL3L1 | 6.96 | 0.00028  |
| PADI4  | 7    | 1.00E-05 |
| IL1B   | 7.73 | 0        |
| MAFB   | 7.91 | 0        |
| AQP9   | 7.91 | 7.00E-05 |
| CCL2   | 9.9  | 0        |

**SB**

| <b>Gene</b> | <b>LogFC.SB - untreated</b> | <b>p.value.adj.SB - untreated</b> |
|-------------|-----------------------------|-----------------------------------|
| MIR744      | -5.07                       | 0.02026                           |
| BMF         | -4.31                       | 0.00175                           |
| MCC         | -3.82                       | 0.01863                           |
| SNORD47     | -3.67                       | 0.04794                           |
| GABBR2      | -3.41                       | 0.0066                            |
| PCIF1       | -3.23                       | 0.00966                           |
| HOTAIR      | -2.76                       | 0.01295                           |
| KLHL24      | -2.7                        | 0.00096                           |
| DNMT3A      | -2.55                       | 0.00699                           |
| CH25H       | -2.5                        | 0.04435                           |
| TPH1        | -2.47                       | 0.01943                           |
| ANGPTL5     | -2.35                       | 0.03841                           |
| KRTAP6-3    | -2.31                       | 0.032                             |
| RXFP1       | -2.27                       | 0.01295                           |
| PLA2G2A     | -2.24                       | 0.0193                            |
| TPSAB1      | -2.24                       | 0.02073                           |
| CD36        | -2.17                       | 0.03966                           |
| PELI2       | -2.08                       | 0.00025                           |
| PHKG1       | -2.06                       | 0.01183                           |
| FRAT1       | -1.97                       | 0.00175                           |
| MCF2L2      | -1.94                       | 0.01208                           |
| FZD2        | -1.93                       | 0.02073                           |
| PACSIN3     | -1.93                       | 0.04354                           |
| TTC7A       | -1.9                        | 0.01633                           |
| C5ORF20     | -1.89                       | 0.00176                           |
| KRTAP20-3   | -1.86                       | 0.04794                           |

|           |       |          |
|-----------|-------|----------|
| PYHIN1    | -1.83 | 0.00442  |
| C17ORF100 | -1.83 | 0.03391  |
| ASS1      | -1.8  | 1.00E-05 |
| C5ORF41   | -1.78 | 0.00076  |
| HABP4     | -1.71 | 0.04318  |
| PEX3      | -1.7  | 0.03518  |
| CCNG2     | -1.68 | 0.00246  |
| METTL7A   | -1.66 | 0.02329  |
| ELA1      | -1.63 | 0.02633  |
| CYP1A1    | -1.56 | 0.0215   |
| BNIP3L    | -1.55 | 5.00E-05 |
| SLC7A5P1  | -1.54 | 0.04676  |
| IPMK      | -1.51 | 0.00762  |
| PINK1     | -1.5  | 0.00437  |
| DHRS9     | 1.54  | 0.00113  |
| SUCNR1    | 1.54  | 0.00569  |
| OKL38     | 1.55  | 5.00E-05 |
| TGM5      | 1.55  | 0.00338  |
| ENTPD7    | 1.56  | 0.00027  |
| NCF2      | 1.56  | 0.00096  |
| EFNB2     | 1.57  | 0.01518  |
| IFT57     | 1.61  | 0.00044  |
| CLPTM1    | 1.65  | 0.00176  |
| FYB       | 1.66  | 0.00898  |
| PHACTR3   | 1.69  | 5.00E-05 |
| CCDC88B   | 1.69  | 0.00966  |
| GPNMB     | 1.71  | 0.02019  |
| C12ORF59  | 1.75  | 0.00341  |
| DLST      | 1.8   | 0.00814  |
| KLHDC7A   | 1.81  | 0.03864  |
| HAVCR2    | 1.89  | 0.00049  |
| PRTG      | 1.9   | 0.02883  |
| GATS      | 1.91  | 0.00011  |
| CART1     | 1.94  | 0.03926  |
| ARHGAP26  | 1.95  | 0.0028   |
| LPHN3     | 1.98  | 0.00266  |
| TAAR9     | 1.98  | 0.04416  |
| CCL3L3    | 2.09  | 9.00E-04 |
| PDE6H     | 2.17  | 0.02153  |
| MAFB      | 2.19  | 0.00471  |
| S100A9    | 2.22  | 1.00E-05 |

|          |      |          |
|----------|------|----------|
| B4GALNT1 | 2.22 | 0.0063   |
| FOLR3    | 2.25 | 0.03247  |
| OLR1     | 2.26 | 0.00671  |
| CR1      | 2.26 | 0.02315  |
| S100A8   | 2.29 | 0.00022  |
| IL1B     | 2.33 | 0.0083   |
| JUN      | 2.41 | 4.00E-05 |
| VASH1    | 2.45 | 0.04523  |
| FOXF1    | 2.48 | 0.03809  |
| CCDC149  | 2.52 | 0.02172  |
| PRR7     | 2.54 | 0.03877  |
| EFCAB1   | 2.68 | 0.03924  |
| MMP9     | 2.69 | 0.03697  |
| IL18RAP  | 2.79 | 0.00653  |
| CLEC5A   | 2.83 | 0        |
| KCNA4    | 3.78 | 0.02193  |
| SPP1     | 4.05 | 0        |
| ERBB4    | 4.18 | 0.0389   |
| NUDT17   | 4.33 | 0.04164  |
| CCL2     | 4.94 | 0        |
| CENTD1   | 5.33 | 0.01391  |
| GPR39    | 5.5  | 0.02073  |
| FLJ12684 | 5.75 | 0.02697  |

### Li

| Gene      | LogFC.GS87 - untreated | p.value.adj.GS87 - untreated |
|-----------|------------------------|------------------------------|
| PRTN3     | -6.12                  | 0                            |
| ZFPM2     | -5.69                  | 0.00762                      |
| MIR425    | -5.5                   | 0.02167                      |
| GPM6B     | -5.02                  | 0.00055                      |
| SLC23A3   | -5                     | 0.00983                      |
| SNORA79   | -4.92                  | 0.04537                      |
| VAT1L     | -4.9                   | 0                            |
| FAM46C    | -4.81                  | 0                            |
| DDN       | -4.74                  | 0                            |
| GAL       | -4.65                  | 0                            |
| SPNS3     | -4.63                  | 1.00E-05                     |
| IRF8      | -4.57                  | 0                            |
| ACCN2     | -4.57                  | 0.00026                      |
| MPO       | -4.38                  | 0                            |
| C20ORF103 | -4.35                  | 0                            |

|            |       |          |
|------------|-------|----------|
| TCEA3      | -4.31 | 1.00E-05 |
| CTSG       | -4.29 | 0        |
| CPA6       | -4.29 | 0.04099  |
| BCL11A     | -4.24 | 0        |
| AFF3       | -4.14 | 3.00E-05 |
| BZRAP1     | -4.11 | 1.00E-05 |
| NAT8L      | -4.11 | 0.01806  |
| FAM69B     | -4.09 | 0        |
| RNASE3     | -4.05 | 0.0027   |
| GPR85      | -4.02 | 0.01673  |
| DYSFIP1    | -3.93 | 0        |
| GARNL3     | -3.9  | 0.01281  |
| UPK2       | -3.82 | 0.02753  |
| KLK1       | -3.78 | 0.02241  |
| C10ORF10   | -3.75 | 0.03697  |
| ELANE      | -3.72 | 0        |
| CTXN1      | -3.72 | 5.00E-05 |
| EBF3       | -3.69 | 0        |
| REEP1      | -3.69 | 0.02793  |
| PRG2       | -3.67 | 0        |
| RGS16      | -3.66 | 6.00E-05 |
| SYNGR1     | -3.63 | 0        |
| C5ORF20    | -3.62 | 0        |
| ADAMTS3    | -3.61 | 0.03369  |
| HPDL       | -3.55 | 0        |
| DTNB       | -3.55 | 0.04734  |
| GRM8       | -3.54 | 0.00732  |
| PNMA6A     | -3.45 | 0.00241  |
| E2F5       | -3.44 | 0        |
| SERPINB10  | -3.42 | 0        |
| CD320      | -3.42 | 1.00E-05 |
| PRSSL1     | -3.42 | 3.00E-04 |
| GATM       | -3.38 | 0        |
| PODXL2     | -3.38 | 1.00E-05 |
| GPR124     | -3.38 | 0.00071  |
| SNHG3-RCC1 | -3.38 | 0.01498  |
| KRBA1      | -3.35 | 0.00866  |
| MYC        | -3.3  | 0        |
| ZDHHC8     | -3.29 | 0        |
| NFIA       | -3.29 | 0.00042  |
| MS4A3      | -3.28 | 0        |

|          |       |          |
|----------|-------|----------|
| PDZD7    | -3.28 | 0.01149  |
| MATK     | -3.26 | 0        |
| THBS4    | -3.19 | 0        |
| GZMH     | -3.19 | 0.04039  |
| FLT3     | -3.18 | 0        |
| C3ORF54  | -3.1  | 0        |
| MLC1     | -3.09 | 0        |
| LPPR3    | -3.09 | 0.00698  |
| C1ORF188 | -3.07 | 0        |
| C5ORF13  | -3.07 | 0        |
| SLC39A14 | -3.06 | 0        |
| ALDH5A1  | -3.05 | 0        |
| DPY19L2  | -3.03 | 0.04471  |
| SOCS2    | -3.01 | 0        |
| GPR18    | -3.01 | 1.00E-05 |
| MS4A6A   | -3    | 0        |
| FAM131B  | -2.98 | 0.00802  |
| MAP6D1   | -2.95 | 0        |
| CHST4    | -2.95 | 0.00531  |
| SHISA2   | -2.93 | 0        |
| PRLR     | -2.93 | 0.00047  |
| KCNN2    | -2.92 | 0        |
| AZU1     | -2.91 | 0        |
| CD59     | -2.91 | 0        |
| DACH1    | -2.91 | 0        |
| KNG1     | -2.9  | 0.00532  |
| RPL36A   | -2.89 | 0        |
| SCGB1D2  | -2.89 | 0.00107  |
| PACSIN3  | -2.88 | 0.002    |
| CA8      | -2.87 | 0        |
| NTHL1    | -2.87 | 0        |
| FZD2     | -2.86 | 0.00028  |
| IMMP2L   | -2.84 | 0        |
| RPP40    | -2.82 | 0        |
| USP18    | -2.81 | 0.01147  |
| GCSH     | -2.8  | 0        |
| MMACHC   | -2.79 | 1.00E-05 |
| TET1     | -2.79 | 0.00925  |
| C1ORF186 | -2.78 | 0        |
| GCAT     | -2.77 | 0        |
| CCDC36   | -2.76 | 0.02591  |

|          |       |          |
|----------|-------|----------|
| BEX2     | -2.76 | 0.03645  |
| ASS1     | -2.74 | 0        |
| PLD6     | -2.74 | 0        |
| FJX1     | -2.72 | 3.00E-05 |
| RXFP1    | -2.72 | 0.00217  |
| MYBBP1A  | -2.71 | 1.00E-05 |
| CFD      | -2.68 | 0        |
| ISOC2    | -2.67 | 0        |
| MACROD1  | -2.67 | 1.00E-05 |
| NPAS1    | -2.66 | 0.03007  |
| WT1      | -2.65 | 0        |
| LILRB4   | -2.65 | 0.00206  |
| IRAK1BP1 | -2.63 | 6.00E-05 |
| WWC1     | -2.63 | 0.00021  |
| NLRP2    | -2.63 | 0.00506  |
| FAM117B  | -2.62 | 0        |
| PM20D2   | -2.61 | 0        |
| SRM      | -2.61 | 0        |
| ADAM23   | -2.61 | 0.01219  |
| TUBA3E   | -2.6  | 0.03415  |
| SLC29A2  | -2.59 | 0        |
| HTR6     | -2.59 | 0.01227  |
| FEZ1     | -2.58 | 0        |
| NOP16    | -2.57 | 0        |
| FLJ39827 | -2.56 | 0        |
| GABRB2   | -2.56 | 0.00197  |
| PNMA3    | -2.55 | 4.00E-05 |
| DEPDC6   | -2.54 | 0.00598  |
| ABCB10   | -2.53 | 0        |
| BMP8B    | -2.52 | 0        |
| SIDT1    | -2.52 | 0.00339  |
| MAP4K1   | -2.5  | 0.00033  |
| ALDH1B1  | -2.49 | 1.00E-05 |
| PUS7     | -2.48 | 0        |
| SAMD13   | -2.47 | 0.00145  |
| CCND2    | -2.46 | 0        |
| ZDHHC11  | -2.46 | 1.00E-05 |
| PAR6G    | -2.45 | 1.00E-04 |
| C7ORF68  | -2.44 | 0        |
| SLC25A23 | -2.43 | 0        |
| SPNS2    | -2.43 | 2.00E-05 |

|          |       |          |
|----------|-------|----------|
| C16ORF13 | -2.42 | 0        |
| PDIA5    | -2.41 | 0        |
| MRPL12   | -2.41 | 4.00E-05 |
| SLITRK5  | -2.41 | 5.00E-05 |
| BCL2     | -2.39 | 0        |
| C12ORF24 | -2.39 | 0        |
| PDCD2L   | -2.39 | 0        |
| TRAP1    | -2.39 | 0        |
| DNAJC12  | -2.38 | 0        |
| SLC25A15 | -2.38 | 0.00055  |
| ALDH18A1 | -2.37 | 0        |
| C21ORF56 | -2.37 | 0.00415  |
| ARHGAP5  | -2.36 | 8.00E-05 |
| GLB1L2   | -2.36 | 0.02187  |
| CYORF15A | -2.36 | 0.04001  |
| C10ORF2  | -2.35 | 0        |
| WIT1     | -2.34 | 0.00025  |
| TMEM161A | -2.34 | 0.00082  |
| C20ORF27 | -2.33 | 0        |
| WDR21A   | -2.33 | 0.00015  |
| KAT2A    | -2.32 | 0        |
| PFN2     | -2.32 | 0.00045  |
| ABCC4    | -2.31 | 0        |
| AK3L1    | -2.29 | 0        |
| SFXN2    | -2.29 | 1.00E-05 |
| ADA      | -2.29 | 2.00E-05 |
| AFMID    | -2.29 | 5.00E-05 |
| DLEU1    | -2.27 | 0        |
| CCDC86   | -2.25 | 0        |
| SLC27A5  | -2.25 | 4.00E-05 |
| LGR4     | -2.24 | 1.00E-05 |
| LASS1    | -2.24 | 3.00E-05 |
| POLR3G   | -2.24 | 0.00097  |
| C9ORF140 | -2.23 | 0        |
| NPM3     | -2.23 | 0        |
| SLC25A19 | -2.23 | 0        |
| RNF207   | -2.23 | 9.00E-05 |
| ALKBH2   | -2.22 | 0        |
| RPL29    | -2.22 | 0        |
| SDK2     | -2.22 | 1.00E-05 |
| ACY1     | -2.22 | 2.00E-05 |



|          |       |          |
|----------|-------|----------|
| C18ORF22 | -2.22 | 2.00E-05 |
| SLC17A9  | -2.22 | 8.00E-05 |
| GAMT     | -2.2  | 0        |
| TYSND1   | -2.2  | 0        |
| C3ORF26  | -2.19 | 0        |
| CDK6     | -2.19 | 0        |
| DBP      | -2.18 | 0.00014  |
| MPP6     | -2.17 | 0        |
| NME1     | -2.17 | 0        |
| CDCA7    | -2.16 | 0        |
| WNT10B   | -2.16 | 0.03838  |
| MIF      | -2.15 | 0        |
| RPS7     | -2.15 | 0        |
| UNG      | -2.15 | 0        |
| CXORF21  | -2.15 | 1.00E-05 |
| HEATR1   | -2.14 | 0        |
| TFAP4    | -2.14 | 0        |
| NHEDC2   | -2.14 | 2.00E-05 |
| IL12A    | -2.14 | 0.02436  |
| GLCCI1   | -2.13 | 2.00E-05 |
| PIK3C2B  | -2.13 | 0.02642  |
| RAB40B   | -2.12 | 1.00E-05 |
| B3GNT6   | -2.12 | 0.00037  |
| IQUB     | -2.12 | 0.01801  |
| VIT      | -2.11 | 0        |
| WIT-1    | -2.11 | 0.00102  |
| FLJ46156 | -2.11 | 0.02187  |
| PRRG2    | -2.11 | 0.03191  |
| P2RY2    | -2.1  | 0        |
| RNF175   | -2.1  | 0.00054  |
| PLCH1    | -2.1  | 0.01615  |
| NOLC1    | -2.09 | 0        |
| LRRC34   | -2.09 | 0.00124  |
| PSMG4    | -2.08 | 0        |
| TGIF2    | -2.08 | 0        |
| EXOSC5   | -2.08 | 1.00E-05 |
| ID3      | -2.08 | 0.00055  |
| DZIP1    | -2.08 | 0.03677  |
| IL26     | -2.08 | 0.03865  |
| C7ORF41  | -2.07 | 0        |
| MCOLN2   | -2.07 | 0        |

|          |       |          |
|----------|-------|----------|
| TSTA3    | -2.07 | 1.00E-05 |
| UBIAD1   | -2.06 | 0        |
| CHCHD6   | -2.05 | 0        |
| SLMO1    | -2.05 | 0        |
| KLHL23   | -2.05 | 0.00308  |
| KLF11    | -2.04 | 0        |
| PRMT1    | -2.04 | 0        |
| LDLRAD3  | -2.04 | 1.00E-05 |
| GIYD2    | -2.04 | 0.02103  |
| BOP1     | -2.03 | 0        |
| IFRD2    | -2.03 | 0        |
| MIPEP    | -2.03 | 3.00E-05 |
| GCDH     | -2.02 | 0        |
| TMOD1    | -2.02 | 8.00E-05 |
| PTPRCAP  | -2.01 | 0        |
| MSRB3    | -2.01 | 0.00011  |
| ZSCAN23  | -2.01 | 0.00311  |
| ZNF286A  | -2.01 | 0.01342  |
| VAPB     | -2.01 | 0.04211  |
| CBS      | -2    | 0        |
| HSPC111  | -2    | 0        |
| PCCB     | -1.99 | 0        |
| TNKS1BP1 | -1.99 | 0.00016  |
| GPT2     | -1.98 | 0        |
| WDR12    | -1.98 | 0        |
| WDR54    | -1.98 | 0        |
| TEAD4    | -1.98 | 2.00E-05 |
| CNKSR3   | -1.98 | 0.00024  |
| C1ORF93  | -1.98 | 0.00096  |
| KIAA0114 | -1.97 | 0        |
| POLD2    | -1.97 | 0        |
| SLC39A3  | -1.97 | 0        |
| MECR     | -1.97 | 0.00023  |
| CEP68    | -1.97 | 0.01843  |
| CENPM    | -1.96 | 0        |
| DTNA     | -1.96 | 0        |
| GEMIN5   | -1.96 | 0        |
| IFT57    | -1.96 | 0        |
| PEBP1    | -1.96 | 0        |
| ITM2A    | -1.96 | 0.00013  |
| PTCD2    | -1.96 | 0.00027  |

|             |       |          |
|-------------|-------|----------|
| DHODH       | -1.96 | 0.00095  |
| DAD1L       | -1.96 | 0.0066   |
| ANKLE1      | -1.95 | 0        |
| DPH2        | -1.95 | 0        |
| TFB2M       | -1.95 | 0        |
| MDN1        | -1.95 | 1.00E-05 |
| KILLIN      | -1.95 | 0.01489  |
| GPD1L       | -1.94 | 0        |
| PSAT1       | -1.94 | 0        |
| SIGMAR1     | -1.94 | 0        |
| C18ORF45    | -1.94 | 0.00087  |
| FAM189B     | -1.93 | 0        |
| SMYD2       | -1.93 | 0        |
| BEND3       | -1.93 | 0.00012  |
| C10ORF79    | -1.93 | 0.0047   |
| CRYZ        | -1.92 | 0        |
| NARS2       | -1.92 | 0        |
| RRP1        | -1.92 | 0        |
| MEST        | -1.92 | 0.03045  |
| EBNA1BP2    | -1.91 | 0        |
| IPO4        | -1.91 | 0        |
| P2RY8       | -1.91 | 1.00E-05 |
| ICOSLG      | -1.91 | 5.00E-05 |
| MCM3APAS    | -1.91 | 0.00196  |
| OXCT2       | -1.9  | 0        |
| PPAT        | -1.9  | 0        |
| SCARB1      | -1.9  | 0        |
| SUPV3L1     | -1.9  | 0        |
| NMNAT3      | -1.9  | 0.00913  |
| KHDRBS3     | -1.9  | 0.00968  |
| TMEM231     | -1.89 | 1.00E-05 |
| TTC26       | -1.89 | 1.00E-05 |
| SNORA71A    | -1.89 | 0.03383  |
| TMEM97      | -1.88 | 0        |
| CAD         | -1.88 | 1.00E-05 |
| LZTFL1      | -1.88 | 2.00E-05 |
| REEP6       | -1.88 | 0.02536  |
| CLYBL       | -1.87 | 0        |
| MTHFD1L     | -1.87 | 0        |
| NHP2        | -1.87 | 0        |
| PPAN-P2RY11 | -1.87 | 3.00E-05 |

|            |       |          |
|------------|-------|----------|
| GAR1       | -1.86 | 0        |
| HSPB1      | -1.86 | 0        |
| KBTBD6     | -1.86 | 0        |
| MBLAC2     | -1.86 | 0        |
| NDUFAF2    | -1.86 | 0        |
| UTP20      | -1.86 | 0.00093  |
| GSDM1      | -1.86 | 0.00144  |
| CABC1      | -1.85 | 0        |
| CENPV      | -1.85 | 0        |
| LRRC20     | -1.85 | 0        |
| LYAR       | -1.85 | 0        |
| NR2F2      | -1.85 | 0        |
| URB2       | -1.85 | 0        |
| HSH2D      | -1.85 | 1.00E-05 |
| ZNF354C    | -1.85 | 0.02723  |
| IQCK       | -1.84 | 3.00E-05 |
| MRT04      | -1.84 | 4.00E-05 |
| FBL        | -1.83 | 0        |
| GINS2      | -1.83 | 0        |
| ST6GAL1    | -1.83 | 0        |
| FLJ13305   | -1.83 | 1.00E-05 |
| DJ222E13.2 | -1.83 | 5.00E-05 |
| TTC7A      | -1.83 | 0.00295  |
| SNORA23    | -1.83 | 0.03754  |
| IMP4       | -1.82 | 0        |
| TOP1MT     | -1.82 | 0        |
| FAHD2B     | -1.82 | 1.00E-05 |
| RUVBL1     | -1.82 | 2.00E-05 |
| FAM86C     | -1.82 | 0.0071   |
| CAMKV      | -1.82 | 0.0425   |
| ABHD14B    | -1.82 | 0.04369  |
| ERI3       | -1.81 | 0        |
| FKBP4      | -1.81 | 0        |
| NOP56      | -1.81 | 0        |
| OAF        | -1.81 | 0        |
| SLC25A4    | -1.81 | 0        |
| TTC27      | -1.8  | 0        |
| SLC39A10   | -1.8  | 1.00E-05 |
| NME4       | -1.79 | 0        |
| PDF        | -1.79 | 0.00011  |
| ZNF185     | -1.79 | 0.01349  |

|          |       |          |
|----------|-------|----------|
| CIRH1A   | -1.78 | 0        |
| MARS2    | -1.78 | 0        |
| LRFN4    | -1.78 | 1.00E-05 |
| CXORF15  | -1.78 | 2.00E-05 |
| DTD1     | -1.77 | 0        |
| ELOVL6   | -1.77 | 0        |
| LY6E     | -1.77 | 0        |
| PFAS     | -1.77 | 0        |
| WDR18    | -1.77 | 0        |
| PRICKLE1 | -1.77 | 1.00E-05 |
| CHST12   | -1.77 | 3.00E-05 |
| NUBP2    | -1.77 | 0.00015  |
| MRM1     | -1.77 | 0.00224  |
| SLC38A5  | -1.76 | 0.00207  |
| TOMM20L  | -1.76 | 0.00995  |
| ASNS     | -1.75 | 0        |
| MYB      | -1.75 | 0        |
| FAM162A  | -1.75 | 1.00E-05 |
| HAGHL    | -1.75 | 2.00E-05 |
| FASN     | -1.74 | 0        |
| KIAA1804 | -1.74 | 0        |
| MTHFD1   | -1.74 | 0        |
| NUCB2    | -1.74 | 0        |
| NUDT7    | -1.74 | 0        |
| REXO4    | -1.74 | 0        |
| PHOSPHO2 | -1.74 | 4.00E-05 |
| NUFIP1   | -1.74 | 9.00E-05 |
| MAGEC2   | -1.74 | 0.00051  |
| FAM86A   | -1.73 | 0        |
| LIN28B   | -1.73 | 0        |
| MRPS26   | -1.73 | 0        |
| SLC16A10 | -1.73 | 0        |
| SLC5A6   | -1.73 | 0        |
| CDCA7L   | -1.73 | 3.00E-05 |
| SOHLH2   | -1.73 | 5.00E-04 |
| ANKRD41  | -1.72 | 0        |
| CCDC34   | -1.72 | 0        |
| CLEC11A  | -1.72 | 0        |
| NUP88    | -1.72 | 0        |
| TDRD7    | -1.72 | 0        |
| UAP1     | -1.72 | 1.00E-05 |

|          |       |          |
|----------|-------|----------|
| CDR2L    | -1.72 | 2.00E-05 |
| BZW2     | -1.71 | 0        |
| METTLL1  | -1.71 | 0        |
| WDR4     | -1.71 | 0        |
| RCC1     | -1.71 | 3.00E-05 |
| ADAM6    | -1.71 | 0.00165  |
| BCAT1    | -1.7  | 0        |
| ENDOG    | -1.7  | 0        |
| PAFAH1B3 | -1.7  | 0        |
| RPL6     | -1.7  | 0        |
| SLC22A4  | -1.7  | 0        |
| SACS     | -1.7  | 1.00E-05 |
| TBC1D4   | -1.7  | 1.00E-05 |
| RET      | -1.7  | 2.00E-05 |
| STUB1    | -1.7  | 0.00097  |
| C12ORF66 | -1.7  | 0.00154  |
| C22ORF9  | -1.69 | 0        |
| NFE2L3   | -1.69 | 0        |
| IMPDH2   | -1.69 | 1.00E-05 |
| DEAF1    | -1.69 | 6.00E-05 |
| CCDC85B  | -1.69 | 0.00035  |
| BEND6    | -1.69 | 0.00045  |
| COQ3     | -1.68 | 0        |
| MEF2D    | -1.68 | 0        |
| SPATA13  | -1.68 | 0.00501  |
| CSDA     | -1.67 | 0        |
| IRX3     | -1.67 | 0        |
| RUVBL2   | -1.67 | 0        |
| SETMAR   | -1.67 | 0        |
| TSPAN32  | -1.67 | 0        |
| TTLL12   | -1.67 | 0        |
| PYCRL    | -1.67 | 0.00019  |
| TBL3     | -1.67 | 0.00137  |
| TMEM45A  | -1.67 | 0.02074  |
| CA2      | -1.66 | 0        |
| LSM7     | -1.66 | 0        |
| NUDT16L1 | -1.66 | 0        |
| C7ORF40  | -1.66 | 1.00E-05 |
| MRPS2    | -1.66 | 4.00E-05 |
| C9ORF41  | -1.66 | 0.00011  |
| SEMA3A   | -1.66 | 0.00708  |

|           |       |          |
|-----------|-------|----------|
| ARL2      | -1.65 | 0        |
| CTNNAL1   | -1.65 | 0        |
| NOLA1     | -1.65 | 0        |
| SFXN4     | -1.65 | 0        |
| FARS2     | -1.65 | 1.00E-05 |
| CD300LG   | -1.65 | 0.01057  |
| ISG20L1   | -1.64 | 0        |
| PPAN      | -1.64 | 0        |
| SCAMP1    | -1.64 | 0        |
| TNFSF13B  | -1.64 | 0        |
| SLC1A3    | -1.64 | 2.00E-05 |
| HOMER1    | -1.64 | 0.00075  |
| GPATCH4   | -1.63 | 0        |
| RUNDC3B   | -1.63 | 2.00E-05 |
| KIAA0133  | -1.63 | 0.00164  |
| AHCY      | -1.62 | 0        |
| GART      | -1.62 | 0        |
| PDCD5     | -1.62 | 0        |
| PHGDH     | -1.62 | 0        |
| RRS1      | -1.62 | 0        |
| TXNIP     | -1.62 | 0        |
| ZNF586    | -1.62 | 0        |
| FAM102B   | -1.62 | 1.00E-05 |
| SLC27A2   | -1.62 | 1.00E-05 |
| BEX1      | -1.62 | 1.00E-04 |
| HOTAIR    | -1.62 | 0.03415  |
| C7ORF65   | -1.62 | 0.03965  |
| CCRN4L    | -1.61 | 1.00E-05 |
| BLMH      | -1.61 | 2.00E-05 |
| QTRT1     | -1.61 | 2.00E-04 |
| ATAD3A    | -1.6  | 0        |
| ELP2      | -1.6  | 0        |
| FTSJ1     | -1.6  | 0        |
| RFTN1     | -1.6  | 0        |
| SORD      | -1.6  | 0        |
| GATA2     | -1.6  | 1.00E-05 |
| JUP       | -1.6  | 1.00E-05 |
| WDR27     | -1.6  | 3.00E-05 |
| TNS3      | -1.6  | 4.00E-05 |
| CGI-96    | -1.6  | 1.00E-04 |
| HIST2H2AC | -1.6  | 0.00029  |

|           |       |          |
|-----------|-------|----------|
| ACOT7     | -1.59 | 0        |
| ATXN10    | -1.59 | 0        |
| MRPL54    | -1.59 | 0        |
| AARSD1    | -1.59 | 1.00E-05 |
| RDH13     | -1.59 | 1.00E-05 |
| AAMP      | -1.59 | 0.00075  |
| HRSP12    | -1.58 | 0        |
| MRPL36    | -1.58 | 0        |
| REXO2     | -1.58 | 0        |
| POLR3D    | -1.58 | 1.00E-05 |
| ZNF92     | -1.58 | 0.03565  |
| SCO2      | -1.57 | 0        |
| KCTD15    | -1.57 | 1.00E-05 |
| COMTD1    | -1.57 | 5.00E-05 |
| BCL2L11   | -1.57 | 0.00015  |
| CARM1     | -1.56 | 0        |
| CCRK      | -1.56 | 0        |
| FYN       | -1.56 | 0        |
| SNORD96A  | -1.56 | 0.00022  |
| IMPACT    | -1.56 | 0.00064  |
| PDGFD     | -1.56 | 0.00327  |
| SNORD96B  | -1.56 | 0.00416  |
| POP1      | -1.55 | 0        |
| BYSL      | -1.55 | 1.00E-05 |
| C1QBP     | -1.55 | 2.00E-05 |
| B4GALT2   | -1.55 | 0.00022  |
| LPHN2     | -1.55 | 0.00061  |
| C10ORF125 | -1.55 | 0.00211  |
| MRPL4     | -1.54 | 0        |
| PEMT      | -1.54 | 0        |
| QDPR      | -1.54 | 0        |
| IPO13     | -1.54 | 1.00E-05 |
| POLR2I    | -1.54 | 1.00E-05 |
| SLC25A10  | -1.54 | 1.00E-05 |
| ABHD14A   | -1.54 | 3.00E-05 |
| POMT2     | -1.54 | 3.00E-05 |
| POLR1B    | -1.54 | 5.00E-05 |
| ASMTL     | -1.54 | 4.00E-04 |
| FARSB     | -1.54 | 0.00056  |
| DLX1      | -1.53 | 0        |
| KATNB1    | -1.53 | 0        |



|                |       |          |
|----------------|-------|----------|
| TARBP1         | -1.53 | 0        |
| TCFL5          | -1.53 | 0        |
| DKFZP686O24166 | -1.53 | 1.00E-05 |
| UHRF1          | -1.53 | 1.00E-05 |
| MINA           | -1.53 | 2.00E-05 |
| C8ORF38        | -1.53 | 3.00E-05 |
| SNORA84        | -1.53 | 0.00013  |
| KLHL35         | -1.53 | 0.00068  |
| KIAA0368       | -1.53 | 0.00094  |
| UGT2B11        | -1.53 | 0.00211  |
| DEFB122        | -1.53 | 0.01389  |
| BCAR4          | -1.53 | 0.01448  |
| MT1G           | -1.52 | 0        |
| NAT14          | -1.52 | 0        |
| AKR7A3         | -1.52 | 1.00E-05 |
| EIF3CL         | -1.52 | 2.00E-05 |
| ORM2           | -1.52 | 2.00E-05 |
| ZBTB44         | -1.52 | 2.00E-05 |
| C12ORF45       | -1.52 | 3.00E-05 |
| ZNF74          | -1.52 | 5.00E-05 |
| PATZ1          | -1.52 | 0.00031  |
| FERMT1         | -1.52 | 0.00409  |
| CYP27B1        | -1.52 | 0.00647  |
| PDXP           | -1.51 | 1.00E-05 |
| PFKM           | -1.51 | 1.00E-05 |
| NLN            | -1.51 | 0.00011  |
| ACN9           | -1.5  | 0        |
| BCKDHB         | -1.5  | 0        |
| GNL3           | -1.5  | 0        |
| IRX5           | -1.5  | 0        |
| LRP3           | -1.5  | 0        |
| MFSD3          | -1.5  | 0        |
| MTP18          | -1.5  | 1.00E-05 |
| ORM1           | -1.5  | 1.00E-05 |
| XRCC6BP1       | -1.5  | 1.00E-05 |
| CCDC58         | -1.5  | 2.00E-05 |
| PRSS12         | -1.5  | 4.00E-05 |
| RPS21          | -1.5  | 7.00E-05 |
| EIF4EBP1       | -1.5  | 8.00E-05 |
| MGC35361       | -1.5  | 0.00013  |
| FSTL3          | -1.5  | 0.00893  |

|           |      |          |
|-----------|------|----------|
| IGF2R     | 1.5  | 0        |
| RCSD1     | 1.5  | 1.00E-05 |
| TMEM175   | 1.5  | 1.00E-05 |
| HNMT      | 1.5  | 2.00E-05 |
| MTHFS     | 1.5  | 2.00E-05 |
| SFXN5     | 1.5  | 2.00E-05 |
| KIAA1598  | 1.5  | 5.00E-05 |
| LPHN3     | 1.5  | 0.00122  |
| CYTIP     | 1.5  | 0.00249  |
| ZFAND3    | 1.5  | 0.02012  |
| ZNF485    | 1.5  | 0.02642  |
| GRINA     | 1.51 | 0        |
| KCTD12    | 1.51 | 0        |
| ITGAV     | 1.51 | 1.00E-05 |
| KLF4      | 1.51 | 1.00E-05 |
| RNF149    | 1.51 | 1.00E-05 |
| PELI1     | 1.51 | 1.00E-04 |
| B3GNT8    | 1.52 | 2.00E-05 |
| MTHFR     | 1.52 | 0.00025  |
| KIAA1271  | 1.52 | 0.01134  |
| SDPR      | 1.52 | 0.0258   |
| OR51D1    | 1.52 | 0.03413  |
| NPL       | 1.53 | 0        |
| TANK      | 1.53 | 0        |
| ENG       | 1.53 | 1.00E-05 |
| PSCD1     | 1.53 | 1.00E-05 |
| ALPK1     | 1.53 | 2.00E-05 |
| IRF1      | 1.53 | 3.00E-05 |
| SAMD9L    | 1.53 | 8.00E-05 |
| CASP7     | 1.53 | 0.00027  |
| MAP7      | 1.53 | 0.00952  |
| KRTAP10-1 | 1.53 | 0.04142  |
| IFNGR2    | 1.54 | 0        |
| ACOT11    | 1.54 | 1.00E-05 |
| ZC3H12A   | 1.54 | 2.00E-04 |
| FSTL5     | 1.54 | 0.0025   |
| KCNAB1    | 1.54 | 0.02587  |
| ATP6V1D   | 1.55 | 0        |
| MTMR3     | 1.55 | 0        |
| PFKFB4    | 1.55 | 0        |
| IL18BP    | 1.55 | 0.00015  |

|          |      |          |
|----------|------|----------|
| TIRAP    | 1.55 | 0.00337  |
| FURIN    | 1.55 | 0.0048   |
| RGS2     | 1.56 | 0        |
| CORO1B   | 1.56 | 3.00E-05 |
| PRDM1    | 1.56 | 0.00036  |
| PITPNA   | 1.56 | 0.01239  |
| GBGT1    | 1.57 | 0        |
| INPP1    | 1.57 | 0        |
| CTSH     | 1.57 | 1.00E-05 |
| GDI1     | 1.57 | 2.00E-05 |
| MAP1LC3B | 1.57 | 4.00E-05 |
| ZCCHC24  | 1.57 | 8.00E-05 |
| MOBK2C   | 1.57 | 0.00016  |
| SLC48A1  | 1.58 | 0        |
| DOK3     | 1.58 | 0.00069  |
| SMPD1    | 1.58 | 0.00135  |
| FER1L3   | 1.58 | 0.00335  |
| RGS14    | 1.58 | 0.02448  |
| LPP      | 1.59 | 0        |
| SH3BP1   | 1.59 | 0        |
| DMXL2    | 1.59 | 1.00E-05 |
| CXCL6    | 1.59 | 5.00E-05 |
| PLSCR1   | 1.59 | 0.00296  |
| TMEM187  | 1.59 | 0.00325  |
| EIF2C4   | 1.59 | 0.00592  |
| PLEKHF1  | 1.59 | 0.01424  |
| FAM151B  | 1.59 | 0.01537  |
| NOL3     | 1.59 | 0.03688  |
| GEM      | 1.59 | 0.04669  |
| HPCAL1   | 1.6  | 0        |
| EHD1     | 1.6  | 1.00E-05 |
| ELL2     | 1.6  | 2.00E-05 |
| CLOCK    | 1.6  | 7.00E-05 |
| SH3RF1   | 1.6  | 0.00011  |
| HRH1     | 1.6  | 0.00105  |
| SLCO2B1  | 1.6  | 0.00621  |
| RHOH     | 1.6  | 0.02049  |
| PAX8     | 1.6  | 0.03484  |
| CFLAR    | 1.61 | 0        |
| CTSA     | 1.61 | 1.00E-05 |
| TPK1     | 1.61 | 1.00E-05 |

|            |      |          |
|------------|------|----------|
| RNF19B     | 1.61 | 4.00E-05 |
| PPP2R2C    | 1.61 | 0.0147   |
| ESRRB      | 1.61 | 0.03035  |
| LPIN2      | 1.62 | 0        |
| DCUN1D3    | 1.62 | 2.00E-05 |
| DENND4B    | 1.62 | 2.00E-05 |
| CNTNAP4    | 1.62 | 3.00E-05 |
| GPR162     | 1.62 | 4.00E-05 |
| C10ORF118  | 1.62 | 0.00118  |
| FAM134B    | 1.63 | 0        |
| IL10RB     | 1.63 | 0        |
| SQRDL      | 1.63 | 2.00E-05 |
| TMTC1      | 1.63 | 7.00E-05 |
| C9ORF72    | 1.63 | 0.00084  |
| C9ORF103   | 1.63 | 0.02452  |
| RNU1G2     | 1.64 | 0        |
| RABGAP1    | 1.64 | 0.00021  |
| CSGALNACT2 | 1.64 | 0.00023  |
| TTY1       | 1.64 | 0.00949  |
| FUCA1      | 1.65 | 0        |
| TMEM144    | 1.65 | 2.00E-05 |
| DNHL1      | 1.65 | 0.02201  |
| ANKRD22    | 1.66 | 0        |
| HIF1A      | 1.66 | 0        |
| ENC1       | 1.66 | 3.00E-05 |
| SRA1       | 1.66 | 3.00E-05 |
| B3GNT5     | 1.66 | 0.00012  |
| MITF       | 1.66 | 0.0018   |
| PHC2       | 1.66 | 0.00383  |
| NOTCH1     | 1.67 | 0        |
| WDR26      | 1.67 | 1.00E-05 |
| C11ORF75   | 1.67 | 2.00E-05 |
| EEPD1      | 1.67 | 4.00E-05 |
| NPHP3      | 1.67 | 2.00E-04 |
| PCAF       | 1.67 | 0.03175  |
| GRN        | 1.68 | 0        |
| LACTB      | 1.68 | 0        |
| RNU1-3     | 1.68 | 0        |
| CCDC126    | 1.68 | 1.00E-05 |
| IRF9       | 1.68 | 2.00E-05 |
| ZNF514     | 1.68 | 0.00013  |

|           |      |          |
|-----------|------|----------|
| HSD17B13  | 1.68 | 0.00032  |
| PLXDC2    | 1.68 | 0.0127   |
| OSGIN2    | 1.69 | 0        |
| GALNT12   | 1.69 | 0.00466  |
| SLC38A6   | 1.7  | 0        |
| CHD2      | 1.7  | 3.00E-05 |
| DNAH1     | 1.7  | 0.00024  |
| CD55      | 1.7  | 0.00027  |
| CALHM2    | 1.7  | 0.00039  |
| MX2       | 1.7  | 0.01214  |
| ARHGAP24  | 1.7  | 0.01219  |
| EVPL      | 1.7  | 0.04962  |
| IFNGR1    | 1.71 | 0        |
| SRXN1     | 1.71 | 0        |
| IQCG      | 1.71 | 0.00041  |
| TNFAIP8L3 | 1.71 | 0.00349  |
| C12ORF35  | 1.72 | 0        |
| CLIP1     | 1.72 | 0        |
| KLF2      | 1.72 | 1.00E-05 |
| FMO5      | 1.72 | 0.00021  |
| SLC6A12   | 1.72 | 0.02221  |
| BMP2K     | 1.73 | 0        |
| FCRLB     | 1.73 | 0        |
| MTF1      | 1.73 | 0        |
| RAX2      | 1.73 | 0.02518  |
| MGC3771   | 1.73 | 0.04565  |
| RN7SK     | 1.74 | 0        |
| RNU1-5    | 1.74 | 1.00E-05 |
| ACP2      | 1.74 | 0.00017  |
| NOTCH2    | 1.74 | 0.00061  |
| C19ORF66  | 1.74 | 0.00086  |
| HTR7      | 1.74 | 0.00719  |
| PCTK1     | 1.74 | 0.02616  |
| CLIC2     | 1.74 | 0.03905  |
| KCTD7     | 1.74 | 0.04794  |
| POR       | 1.75 | 0        |
| DYNLT3    | 1.75 | 1.00E-05 |
| RHBDD2    | 1.75 | 1.00E-05 |
| SLC5A3    | 1.75 | 0.00578  |
| KLHDC7A   | 1.75 | 0.00924  |
| KRT37     | 1.75 | 0.01132  |

|           |      |          |
|-----------|------|----------|
| PMAIP1    | 1.76 | 0        |
| CCL23     | 1.76 | 1.00E-05 |
| TMEM87B   | 1.76 | 0.00112  |
| ROBO2     | 1.76 | 0.00643  |
| C5        | 1.76 | 0.02642  |
| OR3A1     | 1.76 | 0.03979  |
| TTYH3     | 1.77 | 0        |
| LGALS12   | 1.77 | 0.00026  |
| ZFP36L1   | 1.78 | 2.00E-05 |
| MAPK13    | 1.78 | 0.00093  |
| SPTA1     | 1.78 | 0.02425  |
| PRR7      | 1.78 | 0.04034  |
| HIST1H2BK | 1.79 | 0        |
| NPC1      | 1.79 | 0        |
| TGFBR2    | 1.79 | 0        |
| CYTH1     | 1.79 | 1.00E-05 |
| F11R      | 1.79 | 1.00E-05 |
| NQO2      | 1.79 | 3.00E-05 |
| FLJ10996  | 1.79 | 0.00324  |
| GOLGA9P   | 1.79 | 0.04175  |
| CCND3     | 1.8  | 0        |
| KRCC1     | 1.8  | 0        |
| GK        | 1.8  | 1.00E-05 |
| TAAR9     | 1.8  | 0.0146   |
| BHLHB2    | 1.81 | 0        |
| CCDC92    | 1.81 | 0.00136  |
| GARNL4    | 1.81 | 0.00185  |
| TMEM91    | 1.81 | 0.00645  |
| SDS       | 1.81 | 0.02633  |
| PTPRG     | 1.81 | 0.0423   |
| PLD3      | 1.82 | 0        |
| FOS       | 1.82 | 1.00E-05 |
| OSBPL11   | 1.82 | 2.00E-05 |
| YPEL5     | 1.82 | 2.00E-05 |
| ANTXR2    | 1.83 | 0        |
| SLC36A1   | 1.83 | 0        |
| FLJ20489  | 1.83 | 6.00E-05 |
| NTSR1     | 1.83 | 0.00012  |
| ANK2      | 1.83 | 0.03369  |
| TECPR1    | 1.84 | 0        |
| CD1D      | 1.84 | 2.00E-05 |

|          |      |          |
|----------|------|----------|
| AMELY    | 1.84 | 0.01581  |
| CCDC147  | 1.85 | 0        |
| HEXB     | 1.85 | 0        |
| TNF      | 1.85 | 0        |
| BST1     | 1.85 | 1.00E-05 |
| LMO3     | 1.85 | 0.01799  |
| CTSB     | 1.86 | 0        |
| DOCK10   | 1.86 | 0        |
| S100A6   | 1.86 | 0        |
| ADAM17   | 1.86 | 1.00E-05 |
| PTAFR    | 1.86 | 0.00041  |
| ACOX2    | 1.86 | 0.00097  |
| C2CD2L   | 1.86 | 0.00159  |
| CIDECP   | 1.86 | 0.00674  |
| CAPN10   | 1.86 | 0.01312  |
| ARHGAP27 | 1.87 | 0        |
| FGD3     | 1.87 | 0        |
| CDA      | 1.87 | 8.00E-04 |
| PCDHGA3  | 1.87 | 0.03503  |
| CD300LF  | 1.88 | 0        |
| DDIT3    | 1.88 | 0        |
| ANXA1    | 1.88 | 3.00E-05 |
| PML      | 1.88 | 0.04573  |
| C1ORF162 | 1.89 | 0        |
| LRP10    | 1.89 | 0        |
| LTB4R    | 1.89 | 0        |
| NFKBIL1  | 1.89 | 0.04289  |
| FERMT3   | 1.9  | 0        |
| TOM1     | 1.9  | 0        |
| MXD1     | 1.9  | 2.00E-05 |
| TRIM38   | 1.9  | 5.00E-05 |
| CTSK     | 1.9  | 0.00058  |
| CART1    | 1.9  | 0.01511  |
| TBC1D2   | 1.9  | 0.01581  |
| NAGK     | 1.91 | 0        |
| SAT1     | 1.91 | 0        |
| C9ORF164 | 1.91 | 0.00106  |
| LYG1     | 1.91 | 0.03484  |
| PSAP     | 1.92 | 0        |
| MMP25    | 1.92 | 1.00E-05 |
| SLC44A2  | 1.92 | 1.00E-05 |

|           |      |          |
|-----------|------|----------|
| PAX3      | 1.92 | 0.00651  |
| TFF2      | 1.92 | 0.0306   |
| CPD       | 1.93 | 0        |
| DNAJB2    | 1.93 | 0        |
| DPYD      | 1.93 | 0        |
| NINJ2     | 1.93 | 0        |
| SYTL3     | 1.93 | 2.00E-05 |
| NFKB2     | 1.93 | 0.00013  |
| YPEL3     | 1.93 | 0.00224  |
| AMICA1    | 1.93 | 0.00884  |
| FBXL14    | 1.93 | 0.04565  |
| HILS1     | 1.93 | 0.04567  |
| KIAA0913  | 1.94 | 0        |
| PTPRE     | 1.94 | 0        |
| TNFRSF10D | 1.94 | 0.00263  |
| DOPEY1    | 1.94 | 0.01114  |
| PIR       | 1.95 | 0        |
| SYNJ1     | 1.95 | 0        |
| RHOBTB3   | 1.95 | 2.00E-05 |
| SERTAD1   | 1.96 | 0        |
| SIGLEC7   | 1.96 | 0.00012  |
| CRYL1     | 1.96 | 0.00016  |
| DYSF      | 1.96 | 0.02585  |
| ASTL      | 1.96 | 0.02589  |
| ADORA3    | 1.97 | 0        |
| NID2      | 1.97 | 0.03568  |
| STK40     | 1.98 | 0        |
| BLVRB     | 1.98 | 1.00E-05 |
| PDGFRL    | 1.98 | 7.00E-05 |
| LGALS3    | 1.98 | 0.00057  |
| EGF       | 1.98 | 0.01757  |
| ASB2      | 1.98 | 0.0189   |
| SNORA28   | 1.98 | 0.02917  |
| DENND4C   | 2    | 0        |
| KLF6      | 2    | 0        |
| NRCAM     | 2    | 0.041    |
| TPP1      | 2.01 | 0        |
| HIP1      | 2.01 | 1.00E-05 |
| NMT2      | 2.01 | 6.00E-05 |
| COL9A2    | 2.01 | 0.0026   |
| STX11     | 2.02 | 0        |



|          |      |          |
|----------|------|----------|
| ACPP     | 2.02 | 1.00E-04 |
| VSIG1    | 2.02 | 0.03971  |
| APLP2    | 2.03 | 0        |
| PHCA     | 2.03 | 0        |
| PDLIM5   | 2.03 | 3.00E-04 |
| PTPRC    | 2.04 | 0        |
| PBX3     | 2.04 | 1.00E-05 |
| MR1      | 2.05 | 0        |
| POLD4    | 2.05 | 0.01755  |
| FAM171B  | 2.05 | 0.03943  |
| TMC6     | 2.06 | 0        |
| TMEM127  | 2.06 | 1.00E-05 |
| MYO5C    | 2.06 | 0.00336  |
| RHOB     | 2.06 | 0.01693  |
| IGSF6    | 2.06 | 0.04401  |
| KIAA1370 | 2.07 | 0        |
| S100A4   | 2.07 | 0        |
| PECR     | 2.07 | 2.00E-05 |
| KLF10    | 2.07 | 3.00E-05 |
| ZNF433   | 2.07 | 0.04046  |
| ADAM9    | 2.08 | 0        |
| EMR4P    | 2.08 | 0.00012  |
| CYTH4    | 2.08 | 5.00E-04 |
| BAG3     | 2.09 | 0        |
| NAMPT    | 2.09 | 0        |
| SPPL2A   | 2.09 | 0        |
| STXBP5   | 2.09 | 0        |
| FAM104B  | 2.09 | 0.00058  |
| FAM151A  | 2.09 | 0.00478  |
| IFI6     | 2.1  | 0        |
| NEU1     | 2.1  | 0        |
| PTPN22   | 2.1  | 0        |
| RN5S9    | 2.1  | 0        |
| HS1BP3   | 2.1  | 0.00036  |
| ATP7A    | 2.1  | 0.00198  |
| LITAF    | 2.11 | 0        |
| LRG1     | 2.11 | 0        |
| PANX2    | 2.11 | 0        |
| ICAM3    | 2.12 | 0        |
| TNFSF9   | 2.12 | 2.00E-05 |
| SIGLEC9  | 2.12 | 0.04201  |

|           |      |          |
|-----------|------|----------|
| ARHGAP12  | 2.13 | 0        |
| OSTM1     | 2.13 | 0        |
| PNPLA1    | 2.13 | 2.00E-05 |
| SIGLEC14  | 2.13 | 0.01167  |
| GPR137B   | 2.14 | 3.00E-05 |
| CLCF1     | 2.14 | 4.00E-05 |
| AXUD1     | 2.15 | 0        |
| RELB      | 2.15 | 0        |
| EVI2A     | 2.15 | 1.00E-05 |
| ECM1      | 2.15 | 4.00E-05 |
| MVP       | 2.15 | 0.00015  |
| PDE6H     | 2.16 | 0.00353  |
| NPR2      | 2.16 | 0.00576  |
| ATP6V0A1  | 2.17 | 0        |
| HSF4      | 2.17 | 0.01433  |
| CYP17A1   | 2.17 | 0.01603  |
| RAB31     | 2.18 | 0        |
| SDCBP     | 2.18 | 0        |
| TGFBR1    | 2.18 | 0.02593  |
| RHBDL2    | 2.18 | 0.03799  |
| ACSL1     | 2.19 | 0        |
| CCPG1     | 2.19 | 0        |
| BATF      | 2.19 | 7.00E-05 |
| CTSO      | 2.2  | 0.00524  |
| AADACL1   | 2.21 | 0        |
| SNORD3C   | 2.21 | 0.00016  |
| GUCA1B    | 2.21 | 0.00041  |
| RHBDF1    | 2.21 | 0.00238  |
| ANXA5     | 2.22 | 0        |
| SECISBP2L | 2.22 | 0        |
| SMOX      | 2.22 | 0        |
| MAPRE3    | 2.22 | 0.01795  |
| IL6ST     | 2.22 | 0.04625  |
| FYB       | 2.23 | 0.00016  |
| TIMP2     | 2.23 | 0.00023  |
| SDSL      | 2.23 | 0.00041  |
| HPD       | 2.23 | 0.00104  |
| GIMAP4    | 2.23 | 0.02319  |
| TRIB2     | 2.24 | 0        |
| MYO5A     | 2.25 | 0        |
| PRKCB     | 2.26 | 0        |

|          |      |          |
|----------|------|----------|
| GPR82    | 2.26 | 0.01355  |
| ADCY4    | 2.26 | 0.04285  |
| SERPINB1 | 2.27 | 0        |
| PKD2L1   | 2.27 | 0.01221  |
| GAS7     | 2.28 | 0        |
| NOD2     | 2.28 | 0.00327  |
| ABTB1    | 2.28 | 0.00781  |
| SLC38A3  | 2.28 | 0.03778  |
| PECAM1   | 2.29 | 0        |
| PRKCB1   | 2.29 | 0        |
| PSCD4    | 2.29 | 0        |
| APOB48R  | 2.29 | 2.00E-05 |
| ZNF397   | 2.29 | 0.01327  |
| FTHL2    | 2.29 | 0.03467  |
| CD53     | 2.3  | 0        |
| NCF1B    | 2.3  | 0.00064  |
| SRC      | 2.3  | 0.04489  |
| ARHGAP9  | 2.31 | 0        |
| MCOLN1   | 2.31 | 1.00E-05 |
| CDS1     | 2.31 | 0.00878  |
| CPEB4    | 2.33 | 7.00E-05 |
| RAB7B    | 2.33 | 1.00E-04 |
| PH-4     | 2.33 | 0.0146   |
| ZMYND11  | 2.33 | 0.02593  |
| ORAI3    | 2.33 | 0.0368   |
| GBP2     | 2.34 | 0        |
| KAT2B    | 2.34 | 0        |
| NLRP12   | 2.34 | 1.00E-05 |
| RAB20    | 2.34 | 1.00E-05 |
| ICAM1    | 2.34 | 6.00E-04 |
| MSC      | 2.34 | 0.0139   |
| GLRX     | 2.35 | 0        |
| PDLIM7   | 2.35 | 2.00E-05 |
| C2ORF58  | 2.35 | 0.00011  |
| ARRDC3   | 2.35 | 0.00247  |
| G6PD     | 2.36 | 0        |
| BEST1    | 2.36 | 0.00035  |
| LSP1     | 2.37 | 0        |
| MGAM     | 2.37 | 0.00044  |
| PLEKHG2  | 2.37 | 0.01506  |
| KIAA0247 | 2.38 | 0        |

|           |      |          |
|-----------|------|----------|
| IRS1      | 2.38 | 0.03997  |
| C3AR1     | 2.39 | 0        |
| IL4R      | 2.39 | 0        |
| ASRGL1    | 2.39 | 1.00E-05 |
| ANKDD1A   | 2.39 | 2.00E-05 |
| FRMD7     | 2.39 | 0.00674  |
| TLR6      | 2.4  | 0.00084  |
| C1ORF183  | 2.4  | 0.02246  |
| LAPTM5    | 2.41 | 0        |
| TNFAIP6   | 2.41 | 0        |
| TPCN1     | 2.41 | 0.00217  |
| CAMSAP1L1 | 2.41 | 0.00632  |
| C12ORF59  | 2.43 | 3.00E-05 |
| SRGAP1    | 2.43 | 0.00082  |
| WDR31     | 2.43 | 0.02351  |
| RIT1      | 2.44 | 0        |
| DEFB115   | 2.44 | 0.04626  |
| RSPH3     | 2.45 | 2.00E-05 |
| TMEM169   | 2.45 | 0.03114  |
| AIM2      | 2.46 | 1.00E-05 |
| PLXNC1    | 2.46 | 0.00556  |
| GABARAPL1 | 2.47 | 0        |
| ID2       | 2.47 | 0        |
| TMOD2     | 2.47 | 0.00758  |
| FLRT2     | 2.47 | 0.02116  |
| KCNB2     | 2.47 | 0.02433  |
| P2RY13    | 2.48 | 0.02707  |
| OSCAR     | 2.49 | 0        |
| PGD       | 2.49 | 0        |
| SH3BGRL3  | 2.49 | 0        |
| SLC15A3   | 2.49 | 0        |
| PTGS1     | 2.49 | 1.00E-05 |
| DENND2D   | 2.49 | 0.02099  |
| LAT       | 2.5  | 0        |
| OXGR1     | 2.51 | 0.02769  |
| CMTM1     | 2.52 | 0        |
| LGALS1    | 2.52 | 0        |
| SERPINB2  | 2.52 | 0        |
| ADAM8     | 2.52 | 8.00E-05 |
| RGPD1     | 2.52 | 0.00048  |
| COL15A1   | 2.52 | 0.01375  |

|          |      |          |
|----------|------|----------|
| CA10     | 2.52 | 0.02538  |
| DNASE2   | 2.53 | 0.00017  |
| MAFF     | 2.54 | 0        |
| PSTPIP1  | 2.54 | 1.00E-04 |
| ENPP2    | 2.54 | 0.00028  |
| BRI3     | 2.55 | 0        |
| HK1      | 2.55 | 0        |
| NINJ1    | 2.55 | 0        |
| CTNNA1   | 2.55 | 6.00E-05 |
| SIGLECP3 | 2.55 | 0.00039  |
| TRAF3IP3 | 2.56 | 1.00E-05 |
| EID3     | 2.56 | 0.00077  |
| GBP3     | 2.56 | 0.00154  |
| GRPR     | 2.56 | 0.00261  |
| LILRB2   | 2.56 | 0.00324  |
| IGSF2    | 2.56 | 0.01395  |
| SLC2A5   | 2.57 | 0        |
| APOBEC3B | 2.57 | 0.01404  |
| CD37     | 2.57 | 0.01615  |
| PPP1R15A | 2.59 | 0        |
| SDC4     | 2.59 | 0.01392  |
| MIR23B   | 2.59 | 0.03907  |
| CYP1B1   | 2.6  | 0        |
| GLIPR2   | 2.6  | 0        |
| HBEGF    | 2.6  | 0        |
| DUSP18   | 2.6  | 0.00143  |
| HCK      | 2.61 | 0        |
| PLEKHO2  | 2.61 | 0        |
| NPB      | 2.61 | 0.02953  |
| RASGRP1  | 2.62 | 0.02082  |
| SLC25A24 | 2.63 | 0        |
| TFE3     | 2.63 | 1.00E-05 |
| ITPKA    | 2.64 | 0        |
| MFSD6    | 2.64 | 0        |
| DDX60L   | 2.65 | 0        |
| IL10RA   | 2.66 | 0        |
| VWA5A    | 2.66 | 2.00E-05 |
| IQSEC1   | 2.66 | 0.00551  |
| NPVF     | 2.66 | 0.01457  |
| DOK2     | 2.67 | 0        |
| GLIPR1   | 2.68 | 0        |

|          |      |          |
|----------|------|----------|
| CUEDC1   | 2.68 | 1.00E-05 |
| MIR1275  | 2.7  | 0.00119  |
| GPR84    | 2.71 | 0        |
| MAP3K8   | 2.71 | 1.00E-05 |
| ARX      | 2.71 | 0.01151  |
| AP1S2    | 2.72 | 0        |
| SASH3    | 2.72 | 1.00E-05 |
| PDE1B    | 2.72 | 0.00067  |
| EFCAB1   | 2.72 | 0.00724  |
| TLR1     | 2.73 | 1.00E-05 |
| CD300C   | 2.74 | 0        |
| HIPK2    | 2.74 | 0        |
| RGS1     | 2.74 | 0        |
| SLC31A2  | 2.74 | 0        |
| SLC6A6   | 2.74 | 0        |
| ARAP3    | 2.75 | 0        |
| MIR302C  | 2.75 | 0        |
| PPARG    | 2.75 | 0        |
| CDKN2B   | 2.75 | 1.00E-05 |
| PLP2     | 2.75 | 1.00E-05 |
| SLC12A6  | 2.75 | 0.00016  |
| CLDN7    | 2.75 | 0.01495  |
| ARHGAP18 | 2.76 | 0        |
| CD58     | 2.76 | 0        |
| PLUNC    | 2.76 | 0.03677  |
| CTSL1    | 2.77 | 0        |
| IFI16    | 2.77 | 0        |
| ABHD4    | 2.78 | 0.00201  |
| F5       | 2.78 | 0.0236   |
| SLC11A1  | 2.78 | 0.02764  |
| SP140    | 2.81 | 2.00E-05 |
| C10ORF53 | 2.81 | 0.00976  |
| CD68     | 2.83 | 0        |
| SULF2    | 2.83 | 8.00E-05 |
| CD163    | 2.84 | 0.00072  |
| DUSP5    | 2.85 | 0        |
| IFIT2    | 2.85 | 0.00105  |
| FILIP1L  | 2.87 | 0        |
| CSF1R    | 2.88 | 0        |
| EMR2     | 2.89 | 0        |
| ALOX5AP  | 2.9  | 0        |

|            |      |          |
|------------|------|----------|
| ADORA2A    | 2.91 | 0        |
| NPC2       | 2.91 | 0        |
| ARHGAP26   | 2.92 | 2.00E-05 |
| CXCL2      | 2.92 | 0.00253  |
| SLC7A7     | 2.93 | 0        |
| TLR8       | 2.93 | 0.00467  |
| PRKACA     | 2.94 | 0.00728  |
| CEBPB      | 2.95 | 0        |
| CYBB       | 2.96 | 0        |
| SH3BP2     | 2.96 | 0.00022  |
| LPAR1      | 2.96 | 0.00093  |
| SNX12      | 2.96 | 0.02612  |
| BCL3       | 2.97 | 0        |
| CFP        | 2.97 | 0.00309  |
| C9ORF89    | 3    | 0        |
| NQO1       | 3.01 | 0        |
| VCY        | 3.01 | 0.02364  |
| CACNA2D4   | 3.02 | 0        |
| KYNU       | 3.02 | 0        |
| CLEC4A     | 3.02 | 8.00E-05 |
| CCR1       | 3.03 | 0        |
| TNFRSF14   | 3.04 | 0        |
| YAP1       | 3.04 | 0.00327  |
| BOK        | 3.05 | 0        |
| DUSP6      | 3.05 | 0        |
| FTHL12     | 3.05 | 0        |
| PILRA      | 3.06 | 0        |
| SNORD3D    | 3.06 | 0        |
| CLCNKA     | 3.06 | 0.01402  |
| SLC2A6     | 3.09 | 1.00E-05 |
| DSE        | 3.11 | 3.00E-05 |
| SEMA6B     | 3.11 | 4.00E-05 |
| CD36       | 3.12 | 0.00086  |
| SPDYE1     | 3.13 | 0.04757  |
| ACER3      | 3.14 | 1.00E-05 |
| DISP1      | 3.14 | 0.00295  |
| NCRNA00085 | 3.14 | 0.00457  |
| SERPINA1   | 3.15 | 0.00014  |
| HPSE       | 3.16 | 0.00052  |
| FTHL7      | 3.17 | 0        |
| HSPA1L     | 3.18 | 0.0126   |

|            |      |          |
|------------|------|----------|
| ERMN       | 3.18 | 0.03503  |
| FPR2       | 3.19 | 0.01822  |
| STX1A      | 3.2  | 1.00E-05 |
| CCDC88B    | 3.2  | 2.00E-05 |
| ZNF697     | 3.2  | 0.00021  |
| MEGF9      | 3.22 | 0        |
| ARHGEF3    | 3.23 | 0.02449  |
| SNORD113-4 | 3.24 | 0.01682  |
| CCDC149    | 3.25 | 0.00076  |
| PKIB       | 3.25 | 0.01548  |
| OR8H1      | 3.26 | 0.02554  |
| SLC9A9     | 3.26 | 0.04558  |
| IL8        | 3.27 | 0        |
| COL7A1     | 3.27 | 0.0114   |
| F3         | 3.29 | 0        |
| SYDE1      | 3.29 | 0.00452  |
| FTHL11     | 3.3  | 0        |
| C16ORF7    | 3.3  | 0.00639  |
| FLJ21687   | 3.3  | 0.02735  |
| WIP1       | 3.31 | 0.00212  |
| CD86       | 3.32 | 0        |
| SIRPB1     | 3.33 | 7.00E-05 |
| CHI3L1     | 3.34 | 0        |
| PNOC       | 3.34 | 0.00164  |
| FOXF1      | 3.34 | 0.002    |
| TMEM140    | 3.35 | 0.02768  |
| DHRS3      | 3.36 | 0.00664  |
| ACVR1      | 3.38 | 0        |
| WSB2       | 3.39 | 1.00E-05 |
| DOCK5      | 3.39 | 2.00E-04 |
| ITGB5      | 3.39 | 0.01984  |
| B4GALNT1   | 3.4  | 7.00E-05 |
| SLC16A6    | 3.4  | 0.00037  |
| KITLG      | 3.4  | 4.00E-04 |
| METTL8     | 3.4  | 0.0178   |
| CTSD       | 3.41 | 0        |
| SQSTM1     | 3.41 | 0        |
| FTHL3      | 3.42 | 0        |
| RBM47      | 3.43 | 0        |
| CCDC129    | 3.43 | 0.01269  |
| SUCNR1     | 3.45 | 0        |



|          |      |          |
|----------|------|----------|
| FTH1     | 3.46 | 0        |
| TYROBP   | 3.46 | 0        |
| LILRA5   | 3.46 | 0.00046  |
| PLIN2    | 3.49 | 0        |
| FMO4     | 3.49 | 0.00093  |
| ABHD8    | 3.5  | 0        |
| GPNMB    | 3.5  | 3.00E-05 |
| PTGS2    | 3.51 | 1.00E-05 |
| TMEM151A | 3.51 | 0.01074  |
| MIR943   | 3.51 | 0.02934  |
| KIAA1618 | 3.54 | 2.00E-05 |
| NLRC4    | 3.54 | 6.00E-05 |
| FCHO2    | 3.54 | 0.03137  |
| ADM      | 3.55 | 0        |
| TNFAIP2  | 3.56 | 0        |
| KRT80    | 3.56 | 0.00015  |
| SPCS2    | 3.56 | 0.04688  |
| IRAK2    | 3.57 | 1.00E-05 |
| C19ORF59 | 3.58 | 0        |
| RGL1     | 3.58 | 0        |
| GALR3    | 3.58 | 0.00311  |
| EFNB2    | 3.6  | 1.00E-05 |
| CYP4B1   | 3.65 | 0        |
| GATS     | 3.65 | 0        |
| C15ORF52 | 3.67 | 1.00E-05 |
| NFKBIZ   | 3.67 | 1.00E-05 |
| IDUA     | 3.67 | 0.00145  |
| FCGRT    | 3.69 | 0        |
| LY96     | 3.7  | 0        |
| TIMP1    | 3.71 | 0        |
| ALOX5    | 3.72 | 0        |
| CAPG     | 3.72 | 0        |
| CD300A   | 3.72 | 3.00E-05 |
| LFNG     | 3.74 | 0        |
| CCL4L1   | 3.75 | 2.00E-05 |
| MIR548L  | 3.75 | 0.04803  |
| CR1      | 3.79 | 2.00E-04 |
| DHRS9    | 3.8  | 0        |
| SIPA1L2  | 3.8  | 0        |
| MTMR7    | 3.8  | 0.00103  |
| UPB1     | 3.81 | 0.00023  |

|           |      |          |
|-----------|------|----------|
| C1RL      | 3.84 | 0.00084  |
| FLJ42986  | 3.85 | 0        |
| KCNA4     | 3.87 | 0.00309  |
| SLA       | 3.89 | 0        |
| TMEM71    | 3.89 | 4.00E-05 |
| C17ORF91  | 3.89 | 0.00292  |
| ZDHHC1    | 3.89 | 0.03325  |
| ANKRD33   | 3.9  | 0        |
| HIST1H2BD | 3.91 | 0.0221   |
| IER5L     | 3.92 | 2.00E-05 |
| UPP1      | 3.92 | 0.00047  |
| OSM       | 3.93 | 3.00E-05 |
| GPR34     | 3.94 | 3.00E-05 |
| FCER1G    | 3.99 | 0        |
| SIGLEC16  | 4.01 | 0.00429  |
| PTPRO     | 4.02 | 0        |
| TNFRSF12A | 4.02 | 0.00016  |
| ADAP2     | 4.03 | 0        |
| TM4SF19   | 4.03 | 0.00228  |
| S100A12   | 4.04 | 0.00266  |
| BTG2      | 4.07 | 0        |
| SLC43A2   | 4.07 | 7.00E-05 |
| CD38      | 4.07 | 0.00088  |
| SLC22A18  | 4.08 | 0.00714  |
| A4GALT    | 4.08 | 0.01583  |
| SLC16A14  | 4.09 | 0.0016   |
| PDGFA     | 4.11 | 0.03756  |
| FLJ20273  | 4.12 | 0        |
| HK3       | 4.12 | 0.006    |
| TBXAS1    | 4.13 | 0        |
| JUN       | 4.16 | 0        |
| NRP1      | 4.17 | 0        |
| ZNF467    | 4.19 | 0.00261  |
| CLEC5A    | 4.21 | 0        |
| OSGIN1    | 4.22 | 8.00E-05 |
| FAM129B   | 4.25 | 0        |
| SGK1      | 4.25 | 0        |
| HP        | 4.27 | 0        |
| MMP9      | 4.29 | 0.00068  |
| HMOX1     | 4.34 | 0        |
| IL18R1    | 4.38 | 7.00E-05 |

|             |      |          |
|-------------|------|----------|
| C10ORF54    | 4.41 | 0        |
| FAM20C      | 4.47 | 0.00266  |
| TNNI2       | 4.48 | 0.00381  |
| SLC47A2     | 4.48 | 0.00839  |
| LAMB3       | 4.48 | 0.02805  |
| CCRL2       | 4.5  | 0.00268  |
| C13ORF31    | 4.52 | 0        |
| SLC2A3      | 4.52 | 0        |
| TTY16       | 4.52 | 0.00191  |
| EGR1        | 4.53 | 0        |
| SPOCD1      | 4.53 | 0.01307  |
| ITGAX       | 4.55 | 0.01101  |
| SCN2A       | 4.59 | 0.01655  |
| OKL38       | 4.61 | 0        |
| FPR1        | 4.61 | 0.00599  |
| FLOT1       | 4.62 | 0        |
| CXCL16      | 4.62 | 9.00E-05 |
| CAMK2D      | 4.62 | 0.00858  |
| SGK         | 4.63 | 0        |
| KIAA1539    | 4.64 | 0.00019  |
| BCL6        | 4.65 | 0        |
| KIAA0513    | 4.67 | 8.00E-05 |
| EGR2        | 4.68 | 1.00E-05 |
| PLCB2       | 4.69 | 0        |
| ERBB4       | 4.71 | 0.00604  |
| CCL20       | 4.73 | 0        |
| SLC2A14     | 4.74 | 0.04561  |
| TBC1D9      | 4.75 | 0.02584  |
| CENTD1      | 4.8  | 0.00229  |
| SLC26A11    | 4.89 | 0.00028  |
| CCL3        | 4.95 | 1.00E-05 |
| AGPAT9      | 4.97 | 0        |
| CDKN1A      | 4.97 | 0        |
| BBS12       | 5    | 0.03233  |
| OLR1        | 5.03 | 1.00E-05 |
| GPR39       | 5.11 | 0.00346  |
| HOM-TES-103 | 5.15 | 0.01045  |
| LRRC25      | 5.19 | 0.00136  |
| FLJ12684    | 5.26 | 0.00326  |
| GNG2        | 5.27 | 0.00308  |
| S100A8      | 5.34 | 0        |

|            |      |          |
|------------|------|----------|
| S100A9     | 5.37 | 0        |
| SLC22A18AS | 5.41 | 5.00E-05 |
| C5AR1      | 5.41 | 8.00E-05 |
| AKR1C3     | 5.41 | 1.00E-04 |
| NNMT       | 5.54 | 0.03655  |
| TMEM158    | 5.58 | 0        |
| GDF15      | 5.59 | 0.00088  |
| NCF1C      | 5.6  | 0        |
| NCF2       | 5.63 | 0        |
| HAVCR2     | 5.69 | 0        |
| EMP1       | 5.7  | 0        |
| SPP1       | 5.71 | 0        |
| IFI30      | 5.71 | 3.00E-05 |
| RASGRP3    | 5.72 | 5.00E-05 |
| NCF1       | 5.75 | 1.00E-05 |
| PDX1       | 5.79 | 0.02134  |
| ABCC3      | 5.88 | 0.02084  |
| FOLR3      | 5.91 | 2.00E-05 |
| MERTK      | 5.99 | 0        |
| ITGAM      | 6    | 0        |
| IER3       | 6.01 | 0        |
| IL18RAP    | 6.01 | 1.00E-05 |
| PHLDA1     | 6.02 | 0        |
| CTSZ       | 6.08 | 0.00944  |
| CCL3L3     | 6.24 | 0        |
| FGR        | 6.28 | 0        |
| CD14       | 6.31 | 0        |
| THBS1      | 6.78 | 0.00074  |
| TM6SF1     | 6.82 | 0.00031  |
| RENBP      | 6.88 | 0.00941  |
| CCL3L1     | 6.96 | 0.00028  |
| PADI4      | 7    | 1.00E-05 |
| IL1B       | 7.73 | 0        |
| MAFB       | 7.91 | 0        |
| AQP9       | 7.91 | 7.00E-05 |
| CCL2       | 9.9  | 0        |
