# Supplementary material
Source: PubMed Central journal article supplement (PMC4936967)
Supplement: NIHMS783958-supplement-11.pdf [file NIHMS783958-supplement-11.pdf]

Table 4 Overlap of genes significantly modulated by GS87, SB and Li from gene microarray study

| Group      | Total # | Gene     | <u>SB~Untreated</u> |          | <u>Li~Untreated</u> |          | <u>GS87~Untreated</u> |          |
|------------|---------|----------|---------------------|----------|---------------------|----------|-----------------------|----------|
|            |         |          | log2FoldChange      | padj     | log2FoldChange      | padj     | log2FoldChange        | padj     |
| GS87 Li SB | 24      | ERBB4    | 4.18                | 0.0389   | 3.8                 | 0.03717  | 4.71                  | 0.00604  |
|            |         | CART1    | 1.94                | 0.03926  | 2.23                | 0.01618  | 1.9                   | 0.01511  |
|            |         | B4GALNT1 | 2.22                | 0.0063   | 2.03                | 0.00601  | 3.4                   | 7.00E-05 |
|            |         | GPNMB    | 1.71                | 0.02019  | 1.65                | 0.0161   | 3.5                   | 3.00E-05 |
|            |         | CCL3L3   | 2.09                | 9.00E-04 | 2.53                | 0.00026  | 6.24                  | 0        |
|            |         | CD36     | -2.17               | 0.03966  | 2.91                | 0.00651  | 3.12                  | 0.00086  |
|            |         | KCNA4    | 3.78                | 0.02193  | 5.07                | 0.00444  | 3.87                  | 0.00309  |
|            |         | FLJ12684 | 5.75                | 0.02697  | 3.86                | 0.03471  | 5.26                  | 0.00326  |
|            |         | GATS     | 1.91                | 0.00011  | 1.52                | 0.00022  | 3.65                  | 0        |
|            |         | PDE6H    | 2.17                | 0.02153  | 2.22                | 0.01358  | 2.16                  | 0.00353  |
|            |         | ARHGAP26 | 1.95                | 0.0028   | 2.53                | 0.00071  | 2.92                  | 2.00E-05 |
|            |         | CCL2     | 4.94                | 0        | 4.76                | 1.00E-05 | 9.9                   | 0        |
|            |         | IL18RAP  | 2.79                | 0.00653  | 2.85                | 0.00403  | 6.01                  | 1.00E-05 |
|            |         | LPHN3    | 1.98                | 0.00266  | 1.69                | 0.00395  | 1.5                   | 0.00122  |
|            |         | CENTD1   | 5.33                | 0.01391  | 4.72                | 0.01183  | 4.8                   | 0.00229  |
|            |         | CCDC149  | 2.52                | 0.02172  | 3.12                | 0.00586  | 3.25                  | 0.00076  |
|            |         | KLHDC7A  | 1.81                | 0.03864  | 1.94                | 0.02069  | 1.75                  | 0.00924  |
|            |         | EFNB2    | 1.57                | 0.01518  | 2.04                | 0.00324  | 3.6                   | 1.00E-05 |
|            |         | FOXF1    | 2.48                | 0.03809  | 2.94                | 0.01855  | 3.34                  | 0.002    |
|            |         | MAFB     | 2.19                | 0.00471  | 2.03                | 0.00459  | 7.91                  | 0        |
|            |         | IL1B     | 2.33                | 0.0083   | 2.71                | 0.0029   | 7.73                  | 0        |
|            |         | EFCAB1   | 2.68                | 0.03924  | 2.67                | 0.02764  | 2.72                  | 0.00724  |
|            |         | GPR39    | 5.5                 | 0.02073  | 5                   | 0.01636  | 5.11                  | 0.00346  |
|            |         | S100A9   | 2.22                | 1.00E-05 | 1.86                | 5.00E-05 | 5.37                  | 0        |
| Li SB      | 6       | PRTG     | 1.9                 | 0.02883  | 2.44                | 0.0067   |                       |          |

|                |                   |       |          |       |          |       |          |
|----------------|-------------------|-------|----------|-------|----------|-------|----------|
|                | <b>NUDT17</b>     | 4.33  | 0.04164  | 4.93  | 0.01615  |       |          |
|                | <b>PHACTR3</b>    | 1.69  | 5.00E-05 | 1.83  | 5.00E-05 |       |          |
|                | <b>CLPTM1</b>     | 1.65  | 0.00176  | 1.78  | 0.00095  |       |          |
|                | <b>DLST</b>       | 1.8   | 0.00814  | 1.6   | 0.00945  |       |          |
|                | <b>KLHL24</b>     | -2.7  | 0.00096  | -2.47 | 0.00103  |       |          |
| <b>GS87 SB</b> | <b>26 CCDC88B</b> | 1.69  | 0.00966  |       |          | 3.2   | 2.00E-05 |
|                | <b>C5ORF20</b>    | -1.89 | 0.00176  |       |          | -3.62 | 0        |
|                | <b>FZD2</b>       | -1.93 | 0.02073  |       |          | -2.86 | 0.00028  |
|                | <b>NCF2</b>       | 1.56  | 0.00096  |       |          | 5.63  | 0        |
|                | <b>ASS1</b>       | -1.8  | 1.00E-05 |       |          | -2.74 | 0        |
|                | <b>FYB</b>        | 1.66  | 0.00898  |       |          | 2.23  | 0.00016  |
|                | <b>PACSIN3</b>    | -1.93 | 0.04354  |       |          | -2.88 | 0.002    |
|                | <b>SPP1</b>       | 4.05  | 0        |       |          | 5.71  | 0        |
|                | <b>OLR1</b>       | 2.26  | 0.00671  |       |          | 5.03  | 1.00E-05 |
|                | <b>C12ORF59</b>   | 1.75  | 0.00341  |       |          | 2.43  | 3.00E-05 |
|                | <b>TTC7A</b>      | -1.9  | 0.01633  |       |          | -1.83 | 0.00295  |
|                | <b>RXFP1</b>      | -2.27 | 0.01295  |       |          | -2.72 | 0.00217  |
|                | <b>S100A8</b>     | 2.29  | 0.00022  |       |          | 5.34  | 0        |
|                | <b>TAAR9</b>      | 1.98  | 0.04416  |       |          | 1.8   | 0.0146   |
|                | <b>OKL38</b>      | 1.55  | 5.00E-05 |       |          | 4.61  | 0        |
|                | <b>CR1</b>        | 2.26  | 0.02315  |       |          | 3.79  | 2.00E-04 |
|                | <b>DHRS9</b>      | 1.54  | 0.00113  |       |          | 3.8   | 0        |
|                | <b>HOTAIR</b>     | -2.76 | 0.01295  |       |          | -1.62 | 0.03415  |
|                | <b>PRR7</b>       | 2.54  | 0.03877  |       |          | 1.78  | 0.04034  |
|                | <b>CLEC5A</b>     | 2.83  | 0        |       |          | 4.21  | 0        |
|                | <b>IFT57</b>      | 1.61  | 0.00044  |       |          | -1.96 | 0        |
|                | <b>SUCNR1</b>     | 1.54  | 0.00569  |       |          | 3.45  | 0        |
|                | <b>JUN</b>        | 2.41  | 4.00E-05 |       |          | 4.16  | 0        |

|                |                  |      |         |       |          |                |
|----------------|------------------|------|---------|-------|----------|----------------|
|                | <b>HAVCR2</b>    | 1.89 | 0.00049 |       | 5.69     | 0              |
|                | <b>FOLR3</b>     | 2.25 | 0.03247 |       | 5.91     | 2.00E-05       |
|                | <b>MMP9</b>      | 2.69 | 0.03697 |       | 4.29     | 0.00068        |
| <b>GS87 Li</b> | <b>66 PRSSL1</b> |      |         | -2.31 | 0.00813  | -3.42 3.00E-04 |
|                | <b>TMEM151A</b>  |      |         | 3.6   | 0.03194  | 3.51 0.01074   |
|                | <b>ID3</b>       |      |         | -2.35 | 0.00221  | -2.08 0.00055  |
|                | <b>C1ORF186</b>  |      |         | 1.68  | 0.00031  | -2.78 0        |
|                | <b>CLCNKA</b>    |      |         | 3.07  | 0.04204  | 3.06 0.01402   |
|                | <b>LASS1</b>     |      |         | -1.96 | 0.00094  | -2.24 3.00E-05 |
|                | <b>CIDECP</b>    |      |         | 1.69  | 0.03539  | 1.86 0.00674   |
|                | <b>HTR7</b>      |      |         | 2.01  | 0.015    | 1.74 0.00719   |
|                | <b>FMO4</b>      |      |         | 2.12  | 0.04115  | 3.49 0.00093   |
|                | <b>NPB</b>       |      |         | 2.95  | 0.04871  | 2.61 0.02953   |
|                | <b>SAMD13</b>    |      |         | -1.89 | 0.02512  | -2.47 0.00145  |
|                | <b>C2ORF58</b>   |      |         | 1.66  | 0.00607  | 2.35 0.00011   |
|                | <b>ADAM23</b>    |      |         | 2.27  | 0.04527  | -2.61 0.01219  |
|                | <b>MYO5C</b>     |      |         | 1.93  | 0.01953  | 2.06 0.00336   |
|                | <b>ZNF467</b>    |      |         | 3.22  | 0.03143  | 4.19 0.00261   |
|                | <b>KRT37</b>     |      |         | 1.81  | 0.02069  | 1.75 0.01132   |
|                | <b>TM6SF1</b>    |      |         | 3.47  | 0.03216  | 6.82 0.00031   |
|                | <b>HP</b>        |      |         | 1.53  | 0.00651  | 4.27 0         |
|                | <b>EMP1</b>      |      |         | 2.34  | 7.00E-05 | 5.7 0          |
|                | <b>FSTL5</b>     |      |         | -1.53 | 0.01237  | 1.54 0.0025    |
|                | <b>TNF</b>       |      |         | 1.71  | 6.00E-05 | 1.85 0         |
|                | <b>EGF</b>       |      |         | 2.27  | 0.03073  | 1.98 0.01757   |
|                | <b>TNFAIP8L3</b> |      |         | 2.29  | 0.00399  | 1.71 0.00349   |
|                | <b>NFKBIZ</b>    |      |         | 1.51  | 0.00835  | 3.67 1.00E-05  |
|                | <b>HSF4</b>      |      |         | 2.69  | 0.03001  | 2.17 0.01433   |

|                  |       |          |       |          |
|------------------|-------|----------|-------|----------|
| <b>SULF2</b>     | 1.56  | 0.01533  | 2.83  | 8.00E-05 |
| <b>TFF2</b>      | 2.45  | 0.03948  | 1.92  | 0.0306   |
| <b>TNFRSF12A</b> | 1.98  | 0.02873  | 4.02  | 0.00016  |
| <b>ABHD14B</b>   | -2.28 | 0.04616  | -1.82 | 0.04369  |
| <b>FAM151A</b>   | 2.5   | 0.00869  | 2.09  | 0.00478  |
| <b>TTY16</b>     | 3.92  | 0.01778  | 4.52  | 0.00191  |
| <b>IRAK1BP1</b>  | -1.51 | 0.00956  | -2.63 | 6.00E-05 |
| <b>ARX</b>       | 3.32  | 0.01699  | 2.71  | 0.01151  |
| <b>FAM171B</b>   | 2.57  | 0.04767  | 2.05  | 0.03943  |
| <b>SDPR</b>      | 1.85  | 0.03312  | 1.52  | 0.0258   |
| <b>CTSG</b>      | -2.19 | 1.00E-05 | -4.29 | 0        |
| <b>PADI4</b>     | 2.5   | 0.02599  | 7     | 1.00E-05 |
| <b>GALR3</b>     | 2.64  | 0.04121  | 3.58  | 0.00311  |
| <b>SLC2A6</b>    | 1.97  | 0.00168  | 3.09  | 1.00E-05 |
| <b>CCL3L1</b>    | 4.09  | 0.01481  | 6.96  | 0.00028  |
| <b>MTMR7</b>     | 3.24  | 0.01298  | 3.8   | 0.00103  |
| <b>FLJ20273</b>  | 1.96  | 0.00366  | 4.12  | 0        |
| <b>PRTN3</b>     | -1.57 | 0.00013  | -6.12 | 0        |
| <b>OXGR1</b>     | 2.49  | 0.04937  | 2.51  | 0.02769  |
| <b>ADORA3</b>    | 1.67  | 0.00013  | 1.97  | 0        |
| <b>VCY</b>       | 3.25  | 0.04871  | 3.01  | 0.02364  |
| <b>C2CD2L</b>    | 2.14  | 0.00445  | 1.86  | 0.00159  |
| <b>RASGRP3</b>   | 3.03  | 0.01021  | 5.72  | 5.00E-05 |
| <b>HSH2D</b>     | -2.09 | 0.00011  | -1.85 | 1.00E-05 |
| <b>ARHGAP5</b>   | -1.6  | 0.00601  | -2.36 | 8.00E-05 |
| <b>SLC47A2</b>   | 5.14  | 0.02295  | 4.48  | 0.00839  |
| <b>KNG1</b>      | -5.7  | 0.0084   | -2.9  | 0.00532  |
| <b>CYP17A1</b>   | 2.64  | 0.03526  | 2.17  | 0.01603  |
| <b>ZMYND11</b>   | 3.32  | 0.01826  | 2.33  | 0.02593  |

|               |       |         |       |          |
|---------------|-------|---------|-------|----------|
| <b>RELB</b>   | 1.9   | 0.00015 | 2.15  | 0        |
| <b>CDKN1A</b> | 1.78  | 0.00068 | 4.97  | 0        |
| <b>CAMKV</b>  | 3.2   | 0.00784 | -1.82 | 0.0425   |
| <b>GATA2</b>  | 1.6   | 0.00015 | -1.6  | 1.00E-05 |
| <b>PRKACA</b> | 2.79  | 0.03163 | 2.94  | 0.00728  |
| <b>PAX3</b>   | 1.61  | 0.04751 | 1.92  | 0.00651  |
| <b>TCEA3</b>  | -2.17 | 0.0053  | -4.31 | 1.00E-05 |
| <b>RGPD1</b>  | 1.65  | 0.02295 | 2.52  | 0.00048  |
| <b>FER1L3</b> | 1.6   | 0.01402 | 1.58  | 0.00335  |
| <b>NOD2</b>   | 2.36  | 0.01285 | 2.28  | 0.00327  |
| <b>CLIC2</b>  | 2.84  | 0.02039 | 1.74  | 0.03905  |
| <b>AGPAT9</b> | 1.65  | 0.00015 | 4.97  | 0        |

|           |           |                 |       |         |
|-----------|-----------|-----------------|-------|---------|
| <b>SB</b> | <b>34</b> | <b>PINK1</b>    | -1.5  | 0.00437 |
|           |           | <b>ANGPTL5</b>  | -2.35 | 0.03841 |
|           |           | <b>PELI2</b>    | -2.08 | 0.00025 |
|           |           | <b>PLA2G2A</b>  | -2.24 | 0.0193  |
|           |           | <b>CYP1A1</b>   | -1.56 | 0.0215  |
|           |           | <b>FRAT1</b>    | -1.97 | 0.00175 |
|           |           | <b>CCNG2</b>    | -1.68 | 0.00246 |
|           |           | <b>HABP4</b>    | -1.71 | 0.04318 |
|           |           | <b>VASH1</b>    | 2.45  | 0.04523 |
|           |           | <b>TGM5</b>     | 1.55  | 0.00338 |
|           |           | <b>ENTPD7</b>   | 1.56  | 0.00027 |
|           |           | <b>ELA1</b>     | -1.63 | 0.02633 |
|           |           | <b>SNORD47</b>  | -3.67 | 0.04794 |
|           |           | <b>TPH1</b>     | -2.47 | 0.01943 |
|           |           | <b>KRTAP6-3</b> | -2.31 | 0.032   |
|           |           | <b>DNMT3A</b>   | -2.55 | 0.00699 |

|                  |       |          |
|------------------|-------|----------|
| <b>PYHIN1</b>    | -1.83 | 0.00442  |
| <b>IPMK</b>      | -1.51 | 0.00762  |
| <b>MIR744</b>    | -5.07 | 0.02026  |
| <b>TPSAB1</b>    | -2.24 | 0.02073  |
| <b>BMF</b>       | -4.31 | 0.00175  |
| <b>C5ORF41</b>   | -1.78 | 0.00076  |
| <b>PEX3</b>      | -1.7  | 0.03518  |
| <b>KRTAP20-3</b> | -1.86 | 0.04794  |
| <b>MCC</b>       | -3.82 | 0.01863  |
| <b>METTTL7A</b>  | -1.66 | 0.02329  |
| <b>SLC7A5P1</b>  | -1.54 | 0.04676  |
| <b>PHKG1</b>     | -2.06 | 0.01183  |
| <b>BNIP3L</b>    | -1.55 | 5.00E-05 |
| <b>C17ORF100</b> | -1.83 | 0.03391  |
| <b>GABBR2</b>    | -3.41 | 0.0066   |
| <b>MCF2L2</b>    | -1.94 | 0.01208  |
| <b>CH25H</b>     | -2.5  | 0.04435  |
| <b>PCIF1</b>     | -3.23 | 0.00966  |

|           |                 |       |          |
|-----------|-----------------|-------|----------|
| <b>Li</b> | <b>47 MEFV</b>  | -1.7  | 0.04239  |
|           | <b>SIAH3</b>    | 2.39  | 0.04433  |
|           | <b>MIR192</b>   | -4.87 | 0.01227  |
|           | <b>GPR114</b>   | 2.07  | 0.00042  |
|           | <b>NIPSNAP1</b> | -1.55 | 7.00E-04 |
|           | <b>PAQR8</b>    | -1.79 | 0.00329  |
|           | <b>FLJ45974</b> | -1.84 | 0.00975  |
|           | <b>ULBP3</b>    | 2.56  | 0.04457  |
|           | <b>GANC</b>     | -1.77 | 0.03945  |
|           | <b>ATHL1</b>    | -1.86 | 0.03072  |

|                 |       |          |
|-----------------|-------|----------|
| <b>MYBPH</b>    | 1.58  | 9.00E-05 |
| <b>NPPA</b>     | -2.12 | 0.01066  |
| <b>PRAMEF5</b>  | -1.64 | 0.04841  |
| <b>LTB</b>      | 1.87  | 0.00015  |
| <b>BTBD2</b>    | -1.59 | 5.00E-05 |
| <b>TMPRSS13</b> | -1.51 | 0.0179   |
| <b>ZNF362</b>   | -1.5  | 0.00017  |
| <b>NR1D2</b>    | -1.7  | 0.00126  |
| <b>TRHDE</b>    | 2.69  | 0.03454  |
| <b>LYPD6B</b>   | 1.63  | 0.01742  |
| <b>NEK11</b>    | 1.78  | 0.03493  |
| <b>CLDN5</b>    | 2.89  | 0.01953  |
| <b>LRCH2</b>    | -3.19 | 0.01016  |
| <b>CYP2C18</b>  | -3.42 | 0.02652  |
| <b>SNORA34</b>  | 1.86  | 0.00528  |
| <b>ASB6</b>     | 1.71  | 0.03681  |
| <b>OR5J2</b>    | 2.02  | 0.04995  |
| <b>LRRC26</b>   | -1.64 | 0.00431  |
| <b>PRSS23</b>   | -1.9  | 0.02254  |
| <b>FOXB2</b>    | 2.08  | 0.03073  |
| <b>OR5B3</b>    | -2.04 | 0.04925  |
| <b>MIR580</b>   | -3.75 | 0.04277  |
| <b>CRIP1</b>    | 1.66  | 0.00573  |
| <b>VCAN</b>     | 1.83  | 0.00443  |
| <b>ICA1</b>     | -1.55 | 0.00101  |
| <b>COX11</b>    | 1.81  | 0.00743  |
| <b>SLC5A1</b>   | -1.73 | 0.02076  |
| <b>DYX1C1</b>   | 2.08  | 0.04455  |
| <b>SPG3A</b>    | -1.53 | 0.02016  |



|         |       |         |
|---------|-------|---------|
| MLLT11  | 1.6   | 0.00128 |
| ANKRD55 | -1.56 | 0.01222 |
| C7ORF4  | 3.4   | 0.02646 |
| UGT1A5  | -3.52 | 0.04651 |
| DNAH5   | 3.32  | 0.02223 |
| YPEL2   | -1.55 | 0.02386 |
| C4ORF6  | 3.01  | 0.03951 |
| MLXIP   | -1.7  | 0.04429 |

|             |             |            |       |          |
|-------------|-------------|------------|-------|----------|
| <b>GS87</b> | <b>1206</b> | RNU1-5     | 1.74  | 1.00E-05 |
|             |             | B3GNT5     | 1.66  | 0.00012  |
|             |             | MLC1       | -3.09 | 0        |
|             |             | TSPAN32    | -1.67 | 0        |
|             |             | GNL3       | -1.5  | 0        |
|             |             | BTG2       | 4.07  | 0        |
|             |             | PSTPIP1    | 2.54  | 1.00E-04 |
|             |             | LPP        | 1.59  | 0        |
|             |             | ZNF485     | 1.5   | 0.02642  |
|             |             | UTP20      | -1.86 | 0.00093  |
|             |             | SUPV3L1    | -1.9  | 0        |
|             |             | PTPRCAP    | -2.01 | 0        |
|             |             | GCSH       | -2.8  | 0        |
|             |             | BYSL       | -1.55 | 1.00E-05 |
|             |             | PDF        | -1.79 | 0.00011  |
|             |             | SLC22A18AS | 5.41  | 5.00E-05 |
|             |             | MEF2D      | -1.68 | 0        |
|             |             | HSPB1      | -1.86 | 0        |
|             |             | IL26       | -2.08 | 0.03865  |
|             |             | C16ORF7    | 3.3   | 0.00639  |

|          |       |          |
|----------|-------|----------|
| LRP3     | -1.5  | 0        |
| APOB48R  | 2.29  | 2.00E-05 |
| MRPL4    | -1.54 | 0        |
| BCAR4    | -1.53 | 0.01448  |
| TSTA3    | -2.07 | 1.00E-05 |
| MATK     | -3.26 | 0        |
| NCF1C    | 5.6   | 0        |
| NCF1B    | 2.3   | 0.00064  |
| GDF15    | 5.59  | 0.00088  |
| ANXA1    | 1.88  | 3.00E-05 |
| SIDT1    | -2.52 | 0.00339  |
| C1RL     | 3.84  | 0.00084  |
| CD300C   | 2.74  | 0        |
| AMICA1   | 1.93  | 0.00884  |
| TOP1MT   | -1.82 | 0        |
| FAM134B  | 1.63  | 0        |
| NTSR1    | 1.83  | 0.00012  |
| MITF     | 1.66  | 0.0018   |
| RENBP    | 6.88  | 0.00941  |
| NUBP2    | -1.77 | 0.00015  |
| LILRB2   | 2.56  | 0.00324  |
| C15ORF52 | 3.67  | 1.00E-05 |
| MSC      | 2.34  | 0.0139   |
| LYG1     | 1.91  | 0.03484  |
| SLC2A5   | 2.57  | 0        |
| IQCK     | -1.84 | 3.00E-05 |
| REEP6    | -1.88 | 0.02536  |
| IMP4     | -1.82 | 0        |
| PLCB2    | 4.69  | 0        |

|                 |       |          |
|-----------------|-------|----------|
| <b>RDH13</b>    | -1.59 | 1.00E-05 |
| <b>C21ORF56</b> | -2.37 | 0.00415  |
| <b>FAM151B</b>  | 1.59  | 0.01537  |
| <b>C20ORF27</b> | -2.33 | 0        |
| <b>NLRC4</b>    | 3.54  | 6.00E-05 |
| <b>SLC38A5</b>  | -1.76 | 0.00207  |
| <b>CYTH1</b>    | 1.79  | 1.00E-05 |
| <b>KLF11</b>    | -2.04 | 0        |
| <b>ARL2</b>     | -1.65 | 0        |
| <b>FGR</b>      | 6.28  | 0        |
| <b>SLC22A4</b>  | -1.7  | 0        |
| <b>C18ORF45</b> | -1.94 | 0.00087  |
| <b>MSRB3</b>    | -2.01 | 0.00011  |
| <b>AQP9</b>     | 7.91  | 7.00E-05 |
| <b>SLC16A14</b> | 4.09  | 0.0016   |
| <b>SQRDL</b>    | 1.63  | 2.00E-05 |
| <b>IRF1</b>     | 1.53  | 3.00E-05 |
| <b>PTPRE</b>    | 1.94  | 0        |
| <b>LYAR</b>     | -1.85 | 0        |
| <b>KCTD15</b>   | -1.57 | 1.00E-05 |
| <b>WDR21A</b>   | -2.33 | 0.00015  |
| <b>CD1D</b>     | 1.84  | 2.00E-05 |
| <b>RAB40B</b>   | -2.12 | 1.00E-05 |
| <b>TNS3</b>     | -1.6  | 4.00E-05 |
| <b>GK</b>       | 1.8   | 1.00E-05 |
| <b>FAM86C</b>   | -1.82 | 0.0071   |
| <b>MFSD6</b>    | 2.64  | 0        |
| <b>PIR</b>      | 1.95  | 0        |
| <b>RPL36A</b>   | -2.89 | 0        |

|                 |       |          |
|-----------------|-------|----------|
| <b>NRP1</b>     | 4.17  | 0        |
| <b>ALOX5</b>    | 3.72  | 0        |
| <b>NFIA</b>     | -3.29 | 0.00042  |
| <b>AK3L1</b>    | -2.29 | 0        |
| <b>GPR162</b>   | 1.62  | 4.00E-05 |
| <b>BZRAP1</b>   | -4.11 | 1.00E-05 |
| <b>ATXN10</b>   | -1.59 | 0        |
| <b>FASN</b>     | -1.74 | 0        |
| <b>METTL8</b>   | 3.4   | 0.0178   |
| <b>SFXN2</b>    | -2.29 | 1.00E-05 |
| <b>IRX5</b>     | -1.5  | 0        |
| <b>CCDC34</b>   | -1.72 | 0        |
| <b>PTPN22</b>   | 2.1   | 0        |
| <b>SLC39A14</b> | -3.06 | 0        |
| <b>RGS16</b>    | -3.66 | 6.00E-05 |
| <b>SNORA71A</b> | -1.89 | 0.03383  |
| <b>FARSB</b>    | -1.54 | 0.00056  |
| <b>GPR137B</b>  | 2.14  | 3.00E-05 |
| <b>HNMT</b>     | 1.5   | 2.00E-05 |
| <b>PRKCB</b>    | 2.26  | 0        |
| <b>C5AR1</b>    | 5.41  | 8.00E-05 |
| <b>SLC22A18</b> | 4.08  | 0.00714  |
| <b>PDLIM7</b>   | 2.35  | 2.00E-05 |
| <b>GRM8</b>     | -3.54 | 0.00732  |
| <b>COL9A2</b>   | 2.01  | 0.0026   |
| <b>RPL29</b>    | -2.22 | 0        |
| <b>SLCO2B1</b>  | 1.6   | 0.00621  |
| <b>SIGLEC9</b>  | 2.12  | 0.04201  |
| <b>SLC44A2</b>  | 1.92  | 1.00E-05 |

|            |       |          |
|------------|-------|----------|
| BBS12      | 5     | 0.03233  |
| TBL3       | -1.67 | 0.00137  |
| IMPDH2     | -1.69 | 1.00E-05 |
| TLR1       | 2.73  | 1.00E-05 |
| ELANE      | -3.72 | 0        |
| TTY1       | 1.64  | 0.00949  |
| SQSTM1     | 3.41  | 0        |
| TMEM127    | 2.06  | 1.00E-05 |
| ABHD4      | 2.78  | 0.00201  |
| CD55       | 1.7   | 0.00027  |
| PDCD5      | -1.62 | 0        |
| AP1S2      | 2.72  | 0        |
| MACROD1    | -2.67 | 1.00E-05 |
| RPP40      | -2.82 | 0        |
| MTHFR      | 1.52  | 0.00025  |
| PLUNC      | 2.76  | 0.03677  |
| CSGALNACT2 | 1.64  | 0.00023  |
| DACH1      | -2.91 | 0        |
| HSPA1L     | 3.18  | 0.0126   |
| TMEM45A    | -1.67 | 0.02074  |
| PNMA6A     | -3.45 | 0.00241  |
| WDR54      | -1.98 | 0        |
| PLP2       | 2.75  | 1.00E-05 |
| KATNB1     | -1.53 | 0        |
| ZNF397     | 2.29  | 0.01327  |
| HAGHL      | -1.75 | 2.00E-05 |
| DYSF       | 1.96  | 0.02585  |
| RFTN1      | -1.6  | 0        |
| ALKBH2     | -2.22 | 0        |

|           |       |          |
|-----------|-------|----------|
| C20ORF103 | -4.35 | 0        |
| VWA5A     | 2.66  | 2.00E-05 |
| C10ORF79  | -1.93 | 0.0047   |
| KLHL23    | -2.05 | 0.00308  |
| CD38      | 4.07  | 0.00088  |
| NAT8L     | -4.11 | 0.01806  |
| NPC2      | 2.91  | 0        |
| CMTM1     | 2.52  | 0        |
| EVI2A     | 2.15  | 1.00E-05 |
| FTHL2     | 2.29  | 0.03467  |
| LGALS1    | 2.52  | 0        |
| ALDH18A1  | -2.37 | 0        |
| COL15A1   | 2.52  | 0.01375  |
| NPAS1     | -2.66 | 0.03007  |
| FBXL14    | 1.93  | 0.04565  |
| VAT1L     | -4.9  | 0        |
| PSMG4     | -2.08 | 0        |
| IPO4      | -1.91 | 0        |
| QDPR      | -1.54 | 0        |
| LILRB4    | -2.65 | 0.00206  |
| ORM1      | -1.5  | 1.00E-05 |
| PM20D2    | -2.61 | 0        |
| CNKSR3    | -1.98 | 0.00024  |
| BOP1      | -2.03 | 0        |
| HBEGF     | 2.6   | 0        |
| NTHL1     | -2.87 | 0        |
| C9ORF103  | 1.63  | 0.02452  |
| MRPL12    | -2.41 | 4.00E-05 |
| SEMA3A    | -1.66 | 0.00708  |

|                   |       |          |
|-------------------|-------|----------|
| <b>C1ORF188</b>   | -3.07 | 0        |
| <b>PLIN2</b>      | 3.49  | 0        |
| <b>TPCN1</b>      | 2.41  | 0.00217  |
| <b>NFKB2</b>      | 1.93  | 0.00013  |
| <b>BCL2</b>       | -2.39 | 0        |
| <b>SLC2A3</b>     | 4.52  | 0        |
| <b>C3AR1</b>      | 2.39  | 0        |
| <b>FAM102B</b>    | -1.62 | 1.00E-05 |
| <b>ORAI3</b>      | 2.33  | 0.0368   |
| <b>SLC6A6</b>     | 2.74  | 0        |
| <b>DUSP5</b>      | 2.85  | 0        |
| <b>SNHG3-RCC1</b> | -3.38 | 0.01498  |
| <b>CDS1</b>       | 2.31  | 0.00878  |
| <b>SLMO1</b>      | -2.05 | 0        |
| <b>TTYH3</b>      | 1.77  | 0        |
| <b>A4GALT</b>     | 4.08  | 0.01583  |
| <b>SLC12A6</b>    | 2.75  | 0.00016  |
| <b>KBTBD6</b>     | -1.86 | 0        |
| <b>POLR2I</b>     | -1.54 | 1.00E-05 |
| <b>NUDT7</b>      | -1.74 | 0        |
| <b>TLR6</b>       | 2.4   | 0.00084  |
| <b>SLC9A9</b>     | 3.26  | 0.04558  |
| <b>ADORA2A</b>    | 2.91  | 0        |
| <b>RCSD1</b>      | 1.5   | 1.00E-05 |
| <b>C8ORF38</b>    | -1.53 | 3.00E-05 |
| <b>GSDM1</b>      | -1.86 | 0.00144  |
| <b>CAMK2D</b>     | 4.62  | 0.00858  |
| <b>IRS1</b>       | 2.38  | 0.03997  |
| <b>GUCA1B</b>     | 2.21  | 0.00041  |

|             |       |          |
|-------------|-------|----------|
| C12ORF45    | -1.52 | 3.00E-05 |
| PODXL2      | -3.38 | 1.00E-05 |
| HOM-TES-103 | 5.15  | 0.01045  |
| RHOH        | 1.6   | 0.02049  |
| GBGT1       | 1.57  | 0        |
| RHBDF1      | 2.21  | 0.00238  |
| GDI1        | 1.57  | 2.00E-05 |
| RGL1        | 3.58  | 0        |
| DPYD        | 1.93  | 0        |
| C9ORF164    | 1.91  | 0.00106  |
| GOLGA9P     | 1.79  | 0.04175  |
| PLD6        | -2.74 | 0        |
| PHLDA1      | 6.02  | 0        |
| ACOT7       | -1.59 | 0        |
| TMEM87B     | 1.76  | 0.00112  |
| SETMAR      | -1.67 | 0        |
| ENDOG       | -1.7  | 0        |
| ACP2        | 1.74  | 0.00017  |
| MRPL54      | -1.59 | 0        |
| FERMT3      | 1.9   | 0        |
| SIPA1L2     | 3.8   | 0        |
| ATP7A       | 2.1   | 0.00198  |
| PILRA       | 3.06  | 0        |
| PLEKHG2     | 2.37  | 0.01506  |
| PPARG       | 2.75  | 0        |
| MERTK       | 5.99  | 0        |
| COL7A1      | 3.27  | 0.0114   |
| ISOC2       | -2.67 | 0        |
| CHI3L1      | 3.34  | 0        |



|                 |       |          |
|-----------------|-------|----------|
| <b>SIGLEC14</b> | 2.13  | 0.01167  |
| <b>NUP88</b>    | -1.72 | 0        |
| <b>C7ORF41</b>  | -2.07 | 0        |
| <b>CD300A</b>   | 3.72  | 3.00E-05 |
| <b>CD53</b>     | 2.3   | 0        |
| <b>C19ORF66</b> | 1.74  | 0.00086  |
| <b>XRCC6BP1</b> | -1.5  | 1.00E-05 |
| <b>CSDA</b>     | -1.67 | 0        |
| <b>DCUN1D3</b>  | 1.62  | 2.00E-05 |
| <b>CCRN4L</b>   | -1.61 | 1.00E-05 |
| <b>MCOLN2</b>   | -2.07 | 0        |
| <b>NQO2</b>     | 1.79  | 3.00E-05 |
| <b>NEU1</b>     | 2.1   | 0        |
| <b>PNOC</b>     | 3.34  | 0.00164  |
| <b>SERPINA1</b> | 3.15  | 0.00014  |
| <b>STK40</b>    | 1.98  | 0        |
| <b>ANTXR2</b>   | 1.83  | 0        |
| <b>IPO13</b>    | -1.54 | 1.00E-05 |
| <b>PCCB</b>     | -1.99 | 0        |
| <b>PSCD1</b>    | 1.53  | 1.00E-05 |
| <b>UNG</b>      | -2.15 | 0        |
| <b>C9ORF41</b>  | -1.66 | 0.00011  |
| <b>RET</b>      | -1.7  | 2.00E-05 |
| <b>LZTFL1</b>   | -1.88 | 2.00E-05 |
| <b>WDR12</b>    | -1.98 | 0        |
| <b>PKIB</b>     | 3.25  | 0.01548  |
| <b>APOBEC3B</b> | 2.57  | 0.01404  |
| <b>PLXNC1</b>   | 2.46  | 0.00556  |
| <b>CTXN1</b>    | -3.72 | 5.00E-05 |

|           |       |          |
|-----------|-------|----------|
| KRTAP10-1 | 1.53  | 0.04142  |
| AHCY      | -1.62 | 0        |
| FTHL12    | 3.05  | 0        |
| EGR1      | 4.53  | 0        |
| FKBP4     | -1.81 | 0        |
| KIAA1271  | 1.52  | 0.01134  |
| CYORF15A  | -2.36 | 0.04001  |
| TUBA3E    | -2.6  | 0.03415  |
| ECM1      | 2.15  | 4.00E-05 |
| CLDN7     | 2.75  | 0.01495  |
| CD58      | 2.76  | 0        |
| AKR7A3    | -1.52 | 1.00E-05 |
| BST1      | 1.85  | 1.00E-05 |
| LITAF     | 2.11  | 0        |
| LRRC25    | 5.19  | 0.00136  |
| RGS14     | 1.58  | 0.02448  |
| IL18BP    | 1.55  | 0.00015  |
| DNAH1     | 1.7   | 0.00024  |
| DUSP18    | 2.6   | 0.00143  |
| HK3       | 4.12  | 0.006    |
| ABCC4     | -2.31 | 0        |
| FAM69B    | -4.09 | 0        |
| ZCCHC24   | 1.57  | 8.00E-05 |
| RPS21     | -1.5  | 7.00E-05 |
| IRX3      | -1.67 | 0        |
| MS4A6A    | -3    | 0        |
| IFIT2     | 2.85  | 0.00105  |
| KLF6      | 2     | 0        |
| MTF1      | 1.73  | 0        |

|         |       |          |
|---------|-------|----------|
| HILS1   | 1.93  | 0.04567  |
| KLF4    | 1.51  | 1.00E-05 |
| CORO1B  | 1.56  | 3.00E-05 |
| NOL3    | 1.59  | 0.03688  |
| KRCC1   | 1.8   | 0        |
| CXORF21 | -2.15 | 1.00E-05 |
| MT1G    | -1.52 | 0        |
| PFN2    | -2.32 | 0.00045  |
| HS1BP3  | 2.1   | 0.00036  |
| HCK     | 2.61  | 0        |
| TMEM140 | 3.35  | 0.02768  |
| FAM189B | -1.93 | 0        |
| ZNF92   | -1.58 | 0.03565  |
| IFI16   | 2.77  | 0        |
| MAP4K1  | -2.5  | 0.00033  |
| CDCA7L  | -1.73 | 3.00E-05 |
| POLD2   | -1.97 | 0        |
| KCNB2   | 2.47  | 0.02433  |
| LAMB3   | 4.48  | 0.02805  |
| PITPNA  | 1.56  | 0.01239  |
| TNFAIP6 | 2.41  | 0        |
| VIT     | -2.11 | 0        |
| STUB1   | -1.7  | 0.00097  |
| WT1     | -2.65 | 0        |
| TOMM20L | -1.76 | 0.00995  |
| IQUB    | -2.12 | 0.01801  |
| MTHFD1  | -1.74 | 0        |
| SERPIN2 | 2.52  | 0        |
| SLC17A9 | -2.22 | 8.00E-05 |

|          |       |          |
|----------|-------|----------|
| ZFPM2    | -5.69 | 0.00762  |
| FLJ21687 | 3.3   | 0.02735  |
| FTH1     | 3.46  | 0        |
| NHP2     | -1.87 | 0        |
| IER3     | 6.01  | 0        |
| CDK6     | -2.19 | 0        |
| PAFAH1B3 | -1.7  | 0        |
| DTNB     | -3.55 | 0.04734  |
| VAPB     | -2.01 | 0.04211  |
| CTSB     | 1.86  | 0        |
| SMPD1    | 1.58  | 0.00135  |
| DYSFIP1  | -3.93 | 0        |
| ZC3H12A  | 1.54  | 2.00E-04 |
| LIN28B   | -1.73 | 0        |
| MRTO4    | -1.84 | 4.00E-05 |
| C1QBP    | -1.55 | 2.00E-05 |
| MAP3K8   | 2.71  | 1.00E-05 |
| ZNF354C  | -1.85 | 0.02723  |
| EEPD1    | 1.67  | 4.00E-05 |
| FURIN    | 1.55  | 0.0048   |
| EGR2     | 4.68  | 1.00E-05 |
| GARNL4   | 1.81  | 0.00185  |
| SLA      | 3.89  | 0        |
| WWC1     | -2.63 | 0.00021  |
| C5       | 1.76  | 0.02642  |
| VSIG1    | 2.02  | 0.03971  |
| GLB1L2   | -2.36 | 0.02187  |
| PDGFD    | -1.56 | 0.00327  |
| FYN      | -1.56 | 0        |

|                 |       |          |
|-----------------|-------|----------|
| <b>BEX2</b>     | -2.76 | 0.03645  |
| <b>ANK2</b>     | 1.83  | 0.03369  |
| <b>YPEL5</b>    | 1.82  | 2.00E-05 |
| <b>CHST4</b>    | -2.95 | 0.00531  |
| <b>MAPRE3</b>   | 2.22  | 0.01795  |
| <b>SMOX</b>     | 2.22  | 0        |
| <b>C11ORF75</b> | 1.67  | 2.00E-05 |
| <b>SIRPB1</b>   | 3.33  | 7.00E-05 |
| <b>RHBDD2</b>   | 1.75  | 1.00E-05 |
| <b>KLF2</b>     | 1.72  | 1.00E-05 |
| <b>SGK1</b>     | 4.25  | 0        |
| <b>SDC4</b>     | 2.59  | 0.01392  |
| <b>MPO</b>      | -4.38 | 0        |
| <b>TFE3</b>     | 2.63  | 1.00E-05 |
| <b>ANKRD22</b>  | 1.66  | 0        |
| <b>RNF19B</b>   | 1.61  | 4.00E-05 |
| <b>C16ORF13</b> | -2.42 | 0        |
| <b>ZNF586</b>   | -1.62 | 0        |
| <b>POLR3G</b>   | -2.24 | 0.00097  |
| <b>CPD</b>      | 1.93  | 0        |
| <b>C19ORF59</b> | 3.58  | 0        |
| <b>TLR8</b>     | 2.93  | 0.00467  |
| <b>ABCC3</b>    | 5.88  | 0.02084  |
| <b>ITGAV</b>    | 1.51  | 1.00E-05 |
| <b>FTHL7</b>    | 3.17  | 0        |
| <b>TANK</b>     | 1.53  | 0        |
| <b>IL8</b>      | 3.27  | 0        |
| <b>ITPKA</b>    | 2.64  | 0        |
| <b>MGC3771</b>  | 1.73  | 0.04565  |

|          |       |          |
|----------|-------|----------|
| SAMD9L   | 1.53  | 8.00E-05 |
| MAP1LC3B | 1.57  | 4.00E-05 |
| BEST1    | 2.36  | 0.00035  |
| GPATCH4  | -1.63 | 0        |
| MMACHC   | -2.79 | 1.00E-05 |
| ARHGEF3  | 3.23  | 0.02449  |
| P2RY8    | -1.91 | 1.00E-05 |
| PECR     | 2.07  | 2.00E-05 |
| SIGLEC16 | 4.01  | 0.00429  |
| TNNI2    | 4.48  | 0.00381  |
| GABRB2   | -2.56 | 0.00197  |
| DSE      | 3.11  | 3.00E-05 |
| MAP7     | 1.53  | 0.00952  |
| SNORD3D  | 3.06  | 0        |
| RAB20    | 2.34  | 1.00E-05 |
| DISP1    | 3.14  | 0.00295  |
| B4GALT2  | -1.55 | 0.00022  |
| SERTAD1  | 1.96  | 0        |
| DENND4B  | 1.62  | 2.00E-05 |
| KYNU     | 3.02  | 0        |
| PHC2     | 1.66  | 0.00383  |
| CAPG     | 3.72  | 0        |
| CCL20    | 4.73  | 0        |
| CCDC86   | -2.25 | 0        |
| ANKDD1A  | 2.39  | 2.00E-05 |
| PHGDH    | -1.62 | 0        |
| ADAM9    | 2.08  | 0        |
| RUVBL1   | -1.82 | 2.00E-05 |
| STX11    | 2.02  | 0        |

|                 |       |          |
|-----------------|-------|----------|
| <b>TBXAS1</b>   | 4.13  | 0        |
| <b>STXBP5</b>   | 2.09  | 0        |
| <b>MAP6D1</b>   | -2.95 | 0        |
| <b>ALDH1B1</b>  | -2.49 | 1.00E-05 |
| <b>INPP1</b>    | 1.57  | 0        |
| <b>NOP16</b>    | -2.57 | 0        |
| <b>IFNGR2</b>   | 1.54  | 0        |
| <b>PHOSPHO2</b> | -1.74 | 4.00E-05 |
| <b>EMR2</b>     | 2.89  | 0        |
| <b>GIYD2</b>    | -2.04 | 0.02103  |
| <b>PTGS2</b>    | 3.51  | 1.00E-05 |
| <b>EBF3</b>     | -3.69 | 0        |
| <b>OSM</b>      | 3.93  | 3.00E-05 |
| <b>PCK1</b>     | 1.74  | 0.02616  |
| <b>C3ORF54</b>  | -3.1  | 0        |
| <b>KLHL35</b>   | -1.53 | 0.00068  |
| <b>GLIPR2</b>   | 2.6   | 0        |
| <b>NCF1</b>     | 5.75  | 1.00E-05 |
| <b>MYO5A</b>    | 2.25  | 0        |
| <b>PARD6G</b>   | -2.45 | 1.00E-04 |
| <b>CBS</b>      | -2    | 0        |
| <b>BHLHB2</b>   | 1.81  | 0        |
| <b>CNTNAP4</b>  | 1.62  | 3.00E-05 |
| <b>P2RY2</b>    | -2.1  | 0        |
| <b>RABGAP1</b>  | 1.64  | 0.00021  |
| <b>IER5L</b>    | 3.92  | 2.00E-05 |
| <b>GAMT</b>     | -2.2  | 0        |
| <b>TCFL5</b>    | -1.53 | 0        |
| <b>TGFBR1</b>   | 2.18  | 0.02593  |

|            |       |          |
|------------|-------|----------|
| PPP2R2C    | 1.61  | 0.0147   |
| GBP2       | 2.34  | 0        |
| GARNL3     | -3.9  | 0.01281  |
| TGIF2      | -2.08 | 0        |
| PNPLA1     | 2.13  | 2.00E-05 |
| LRRC34     | -2.09 | 0.00124  |
| HK1        | 2.55  | 0        |
| WDR4       | -1.71 | 0        |
| UPK2       | -3.82 | 0.02753  |
| ACCN2      | -4.57 | 0.00026  |
| FAM129B    | 4.25  | 0        |
| HEXB       | 1.85  | 0        |
| IMPACT     | -1.56 | 0.00064  |
| GALNT12    | 1.69  | 0.00466  |
| TMEM169    | 2.45  | 0.03114  |
| BAG3       | 2.09  | 0        |
| NINJ2      | 1.93  | 0        |
| NCRNA00085 | 3.14  | 0.00457  |
| CTSK       | 1.9   | 0.00058  |
| RRS1       | -1.62 | 0        |
| CD300LG    | -1.65 | 0.01057  |
| NOTCH2     | 1.74  | 0.00061  |
| IQCG       | 1.71  | 0.00041  |
| USP18      | -2.81 | 0.01147  |
| MEGF9      | 3.22  | 0        |
| GABARAPL1  | 2.47  | 0        |
| ARHGAP12   | 2.13  | 0        |
| LGALS12    | 1.77  | 0.00026  |
| PLEKHO2    | 2.61  | 0        |



|          |       |          |
|----------|-------|----------|
| DEPDC6   | -2.54 | 0.00598  |
| RUNDC3B  | -1.63 | 2.00E-05 |
| OSTM1    | 2.13  | 0        |
| CCDC147  | 1.85  | 0        |
| KIAA0368 | -1.53 | 0.00094  |
| CCDC85B  | -1.69 | 0.00035  |
| SPDYE1   | 3.13  | 0.04757  |
| PRMT1    | -2.04 | 0        |
| TMOD2    | 2.47  | 0.00758  |
| CDCA7    | -2.16 | 0        |
| AADAACL1 | 2.21  | 0        |
| PDCD2L   | -2.39 | 0        |
| KCNAB1   | 1.54  | 0.02587  |
| SDK2     | -2.22 | 1.00E-05 |
| DPY19L2  | -3.03 | 0.04471  |
| COMTD1   | -1.57 | 5.00E-05 |
| COQ3     | -1.68 | 0        |
| CCL4L1   | 3.75  | 2.00E-05 |
| ZNF514   | 1.68  | 0.00013  |
| CASP7    | 1.53  | 0.00027  |
| ESRRB    | 1.61  | 0.03035  |
| ASRGL1   | 2.39  | 1.00E-05 |
| SLC48A1  | 1.58  | 0        |
| TOM1     | 1.9   | 0        |
| GNG2     | 5.27  | 0.00308  |
| ICOSLG   | -1.91 | 5.00E-05 |
| MTP18    | -1.5  | 1.00E-05 |
| E2F5     | -3.44 | 0        |
| SLC26A11 | 4.89  | 0.00028  |

|          |       |          |
|----------|-------|----------|
| TMC6     | 2.06  | 0        |
| C9ORF140 | -2.23 | 0        |
| TYSND1   | -2.2  | 0        |
| BCL6     | 4.65  | 0        |
| CDKN2B   | 2.75  | 1.00E-05 |
| NMT2     | 2.01  | 6.00E-05 |
| CDR2L    | -1.72 | 2.00E-05 |
| MIR943   | 3.51  | 0.02934  |
| OR3A1    | 1.76  | 0.03979  |
| ACPP     | 2.02  | 1.00E-04 |
| FCRLB    | 1.73  | 0        |
| PDZD7    | -3.28 | 0.01149  |
| CTSD     | 3.41  | 0        |
| POR      | 1.75  | 0        |
| PFKM     | -1.51 | 1.00E-05 |
| DNAJC12  | -2.38 | 0        |
| GART     | -1.62 | 0        |
| ENPP2    | 2.54  | 0.00028  |
| SCARB1   | -1.9  | 0        |
| RNF175   | -2.1  | 0.00054  |
| SLC31A2  | 2.74  | 0        |
| S100A6   | 1.86  | 0        |
| CEP68    | -1.97 | 0.01843  |
| RPL6     | -1.7  | 0        |
| MRPS26   | -1.73 | 0        |
| SLC5A3   | 1.75  | 0.00578  |
| MYC      | -3.3  | 0        |
| WDR26    | 1.67  | 1.00E-05 |
| PELI1    | 1.51  | 1.00E-04 |

|          |       |          |
|----------|-------|----------|
| C12ORF24 | -2.39 | 0        |
| ARAP3    | 2.75  | 0        |
| C1ORF162 | 1.89  | 0        |
| FLJ10996 | 1.79  | 0.00324  |
| GPR18    | -3.01 | 1.00E-05 |
| RAB7B    | 2.33  | 1.00E-04 |
| IL10RB   | 1.63  | 0        |
| GPR124   | -3.38 | 0.00071  |
| TIMP1    | 3.71  | 0        |
| RUVBL2   | -1.67 | 0        |
| KAT2A    | -2.32 | 0        |
| RSPH3    | 2.45  | 2.00E-05 |
| ALPK1    | 1.53  | 2.00E-05 |
| SIGLECP3 | 2.55  | 0.00039  |
| WNT10B   | -2.16 | 0.03838  |
| PSCD4    | 2.29  | 0        |
| TTC27    | -1.8  | 0        |
| LRP10    | 1.89  | 0        |
| RAB31    | 2.18  | 0        |
| TMEM187  | 1.59  | 0.00325  |
| DHRS3    | 3.36  | 0.00664  |
| SLC23A3  | -5    | 0.00983  |
| GAL      | -4.65 | 0        |
| MR1      | 2.05  | 0        |
| EXOSC5   | -2.08 | 1.00E-05 |
| AZU1     | -2.91 | 0        |
| SCGB1D2  | -2.89 | 0.00107  |
| CD86     | 3.32  | 0        |
| RCC1     | -1.71 | 3.00E-05 |

|           |       |          |
|-----------|-------|----------|
| SLC11A1   | 2.78  | 0.02764  |
| LFNG      | 3.74  | 0        |
| PDXP      | -1.51 | 1.00E-05 |
| GPD1L     | -1.94 | 0        |
| IL12A     | -2.14 | 0.02436  |
| SIGMAR1   | -1.94 | 0        |
| LILRA5    | 3.46  | 0.00046  |
| KIAA1539  | 4.64  | 0.00019  |
| ATAD3A    | -1.6  | 0        |
| FARS2     | -1.65 | 1.00E-05 |
| OSGIN2    | 1.69  | 0        |
| TXNIP     | -1.62 | 0        |
| DAD1L     | -1.96 | 0.0066   |
| NNMT      | 5.54  | 0.03655  |
| NUFIP1    | -1.74 | 9.00E-05 |
| ZNF74     | -1.52 | 5.00E-05 |
| NPHP3     | 1.67  | 2.00E-04 |
| SNORD96A  | -1.56 | 0.00022  |
| CCND3     | 1.8   | 0        |
| ADA       | -2.29 | 2.00E-05 |
| HIST2H2AC | -1.6  | 0.00029  |
| ALDH5A1   | -3.05 | 0        |
| SMYD2     | -1.93 | 0        |
| PBX3      | 2.04  | 1.00E-05 |
| C3ORF26   | -2.19 | 0        |
| POLD4     | 2.05  | 0.01755  |
| ANXA5     | 2.22  | 0        |
| TARBP1    | -1.53 | 0        |
| SNORA79   | -4.92 | 0.04537  |

|                 |       |          |
|-----------------|-------|----------|
| <b>NME4</b>     | -1.79 | 0        |
| <b>BATF</b>     | 2.19  | 7.00E-05 |
| <b>BLVRB</b>    | 1.98  | 1.00E-05 |
| <b>REEP1</b>    | -3.69 | 0.02793  |
| <b>HEATR1</b>   | -2.14 | 0        |
| <b>SGK</b>      | 4.63  | 0        |
| <b>CD68</b>     | 2.83  | 0        |
| <b>PRKCB1</b>   | 2.29  | 0        |
| <b>MVP</b>      | 2.15  | 0.00015  |
| <b>GCDH</b>     | -2.02 | 0        |
| <b>GAR1</b>     | -1.86 | 0        |
| <b>NR2F2</b>    | -1.85 | 0        |
| <b>RGS1</b>     | 2.74  | 0        |
| <b>FLJ20489</b> | 1.83  | 6.00E-05 |
| <b>PRDM1</b>    | 1.56  | 0.00036  |
| <b>SLC25A24</b> | 2.63  | 0        |
| <b>LTB4R</b>    | 1.89  | 0        |
| <b>CCDC129</b>  | 3.43  | 0.01269  |
| <b>ACER3</b>    | 3.14  | 1.00E-05 |
| <b>SLC25A15</b> | -2.38 | 0.00055  |
| <b>MX2</b>      | 1.7   | 0.01214  |
| <b>TEAD4</b>    | -1.98 | 2.00E-05 |
| <b>LSM7</b>     | -1.66 | 0        |
| <b>MS4A3</b>    | -3.28 | 0        |
| <b>KIAA0114</b> | -1.97 | 0        |
| <b>PPAN</b>     | -1.64 | 0        |
| <b>CYTH4</b>    | 2.08  | 5.00E-04 |
| <b>CCRL2</b>    | 4.5   | 0.00268  |
| <b>HSD17B13</b> | 1.68  | 0.00032  |

|         |       |          |
|---------|-------|----------|
| SLC38A6 | 1.7   | 0        |
| FPR1    | 4.61  | 0.00599  |
| CCRK    | -1.56 | 0        |
| GLCCI1  | -2.13 | 2.00E-05 |
| C9ORF72 | 1.63  | 0.00084  |
| PTPRC   | 2.04  | 0        |
| PDIA5   | -2.41 | 0        |
| PTCD2   | -1.96 | 0.00027  |
| MIPEP   | -2.03 | 3.00E-05 |
| CD14    | 6.31  | 0        |
| CLOCK   | 1.6   | 7.00E-05 |
| CPA6    | -4.29 | 0.04099  |
| URB2    | -1.85 | 0        |
| MAGEC2  | -1.74 | 0.00051  |
| LRFN4   | -1.78 | 1.00E-05 |
| ITGAM   | 6     | 0        |
| DTD1    | -1.77 | 0        |
| WDR31   | 2.43  | 0.02351  |
| RGS2    | 1.56  | 0        |
| RN7SK   | 1.74  | 0        |
| SDS     | 1.81  | 0.02633  |
| GPR82   | 2.26  | 0.01355  |
| P2RY13  | 2.48  | 0.02707  |
| MGAM    | 2.37  | 0.00044  |
| ENG     | 1.53  | 1.00E-05 |
| WIT-1   | -2.11 | 0.00102  |
| CD163   | 2.84  | 0.00072  |
| CD37    | 2.57  | 0.01615  |
| DBP     | -2.18 | 0.00014  |

|          |       |          |
|----------|-------|----------|
| C18ORF22 | -2.22 | 2.00E-05 |
| SNORA23  | -1.83 | 0.03754  |
| TBC1D4   | -1.7  | 1.00E-05 |
| CCL23    | 1.76  | 1.00E-05 |
| HMOX1    | 4.34  | 0        |
| RNF207   | -2.23 | 9.00E-05 |
| PPP1R15A | 2.59  | 0        |
| HPD      | 2.23  | 0.00104  |
| PDGFRL   | 1.98  | 7.00E-05 |
| ZDHHC11  | -2.46 | 1.00E-05 |
| CCDC36   | -2.76 | 0.02591  |
| GZMH     | -3.19 | 0.04039  |
| TYROBP   | 3.46  | 0        |
| PFAS     | -1.77 | 0        |
| TMEM158  | 5.58  | 0        |
| MIR302C  | 2.75  | 0        |
| OSCAR    | 2.49  | 0        |
| CARM1    | -1.56 | 0        |
| PECAM1   | 2.29  | 0        |
| FAM86A   | -1.73 | 0        |
| PML      | 1.88  | 0.04573  |
| FCGRT    | 3.69  | 0        |
| ZDHHC1   | 3.89  | 0.03325  |
| ADAM6    | -1.71 | 0.00165  |
| B3GNT8   | 1.52  | 2.00E-05 |
| SACS     | -1.7  | 1.00E-05 |
| TTLL12   | -1.67 | 0        |
| ZDHHC8   | -3.29 | 0        |
| KRT80    | 3.56  | 0.00015  |

|                 |       |          |
|-----------------|-------|----------|
| <b>SLC2A14</b>  | 4.74  | 0.04561  |
| <b>LSP1</b>     | 2.37  | 0        |
| <b>PCAF</b>     | 1.67  | 0.03175  |
| <b>CD59</b>     | -2.91 | 0        |
| <b>ANKRD41</b>  | -1.72 | 0        |
| <b>PIK3C2B</b>  | -2.13 | 0.02642  |
| <b>KIAA0913</b> | 1.94  | 0        |
| <b>ARHGAP18</b> | 2.76  | 0        |
| <b>KIAA0247</b> | 2.38  | 0        |
| <b>CCR1</b>     | 3.03  | 0        |
| <b>ARHGAP9</b>  | 2.31  | 0        |
| <b>PLCH1</b>    | -2.1  | 0.01615  |
| <b>PSAP</b>     | 1.92  | 0        |
| <b>NAMPT</b>    | 2.09  | 0        |
| <b>SDSL</b>     | 2.23  | 0.00041  |
| <b>FAHD2B</b>   | -1.82 | 1.00E-05 |
| <b>STX1A</b>    | 3.2   | 1.00E-05 |
| <b>MIR548L</b>  | 3.75  | 0.04803  |
| <b>ACY1</b>     | -2.22 | 2.00E-05 |
| <b>BCL2L11</b>  | -1.57 | 0.00015  |
| <b>DUSP6</b>    | 3.05  | 0        |
| <b>PRSS12</b>   | -1.5  | 4.00E-05 |
| <b>CTNNA1</b>   | 2.55  | 6.00E-05 |
| <b>SPPL2A</b>   | 2.09  | 0        |
| <b>IRAK2</b>    | 3.57  | 1.00E-05 |
| <b>TFB2M</b>    | -1.95 | 0        |
| <b>BLMH</b>     | -1.61 | 2.00E-05 |
| <b>AARSD1</b>   | -1.59 | 1.00E-05 |
| <b>CGI-96</b>   | -1.6  | 1.00E-04 |



|             |       |          |
|-------------|-------|----------|
| KIAA0513    | 4.67  | 8.00E-05 |
| IFI6        | 2.1   | 0        |
| SH3BP2      | 2.96  | 0.00022  |
| S100A4      | 2.07  | 0        |
| DNASE2      | 2.53  | 0.00017  |
| SLC36A1     | 1.83  | 0        |
| PPAN-P2RY11 | -1.87 | 3.00E-05 |
| SLC5A6      | -1.73 | 0        |
| NOP56       | -1.81 | 0        |
| SRXN1       | 1.71  | 0        |
| MRM1        | -1.77 | 0.00224  |
| SDCBP       | 2.18  | 0        |
| C17ORF91    | 3.89  | 0.00292  |
| C10ORF53    | 2.81  | 0.00976  |
| NFKBIL1     | 1.89  | 0.04289  |
| OR8H1       | 3.26  | 0.02554  |
| NUCB2       | -1.74 | 0        |
| PHCA        | 2.03  | 0        |
| RN5S9       | 2.1   | 0        |
| ALOX5AP     | 2.9   | 0        |
| CTSL1       | 2.77  | 0        |
| RASGRP1     | 2.62  | 0.02082  |
| MCOLN1      | 2.31  | 1.00E-05 |
| POLR1B      | -1.54 | 5.00E-05 |
| PLXDC2      | 1.68  | 0.0127   |
| SLC16A6     | 3.4   | 0.00037  |
| CYP27B1     | -1.52 | 0.00647  |
| DMXL2       | 1.59  | 1.00E-05 |
| AAMP        | -1.59 | 0.00075  |

|                       |       |          |
|-----------------------|-------|----------|
| <b>RNASE3</b>         | -4.05 | 0.0027   |
| <b>NLN</b>            | -1.51 | 0.00011  |
| <b>NDUFAF2</b>        | -1.86 | 0        |
| <b>DKFZP686O24166</b> | -1.53 | 1.00E-05 |
| <b>TPP1</b>           | 2.01  | 0        |
| <b>OSGIN1</b>         | 4.22  | 8.00E-05 |
| <b>CXCL2</b>          | 2.92  | 0.00253  |
| <b>PH-4</b>           | 2.33  | 0.0146   |
| <b>FLJ46156</b>       | -2.11 | 0.02187  |
| <b>BOK</b>            | 3.05  | 0        |
| <b>SLC25A4</b>        | -1.81 | 0        |
| <b>NQO1</b>           | 3.01  | 0        |
| <b>FLJ39827</b>       | -2.56 | 0        |
| <b>THBS4</b>          | -3.19 | 0        |
| <b>RAX2</b>           | 1.73  | 0.02518  |
| <b>RRP1</b>           | -1.92 | 0        |
| <b>ACOT11</b>         | 1.54  | 1.00E-05 |
| <b>MIR23B</b>         | 2.59  | 0.03907  |
| <b>TFAP4</b>          | -2.14 | 0        |
| <b>SPNS2</b>          | -2.43 | 2.00E-05 |
| <b>SLITRK5</b>        | -2.41 | 5.00E-05 |
| <b>C1ORF93</b>        | -1.98 | 0.00096  |
| <b>C13ORF31</b>       | 4.52  | 0        |
| <b>ZFP36L1</b>        | 1.78  | 2.00E-05 |
| <b>DZIP1</b>          | -2.08 | 0.03677  |
| <b>NLRP2</b>          | -2.63 | 0.00506  |
| <b>FLT3</b>           | -3.18 | 0        |
| <b>C10ORF125</b>      | -1.55 | 0.00211  |
| <b>CHD2</b>           | 1.7   | 3.00E-05 |

|                 |       |          |
|-----------------|-------|----------|
| <b>TMEM175</b>  | 1.5   | 1.00E-05 |
| <b>BRI3</b>     | 2.55  | 0        |
| <b>ARRDC3</b>   | 2.35  | 0.00247  |
| <b>PDX1</b>     | 5.79  | 0.02134  |
| <b>SERPINB1</b> | 2.27  | 0        |
| <b>DDIT3</b>    | 1.88  | 0        |
| <b>HPCAL1</b>   | 1.6   | 0        |
| <b>LGALS3</b>   | 1.98  | 0.00057  |
| <b>HOMER1</b>   | -1.64 | 0.00075  |
| <b>ZNF286A</b>  | -2.01 | 0.01342  |
| <b>PSAT1</b>    | -1.94 | 0        |
| <b>DOK3</b>     | 1.58  | 0.00069  |
| <b>UPB1</b>     | 3.81  | 0.00023  |
| <b>GIMAP4</b>   | 2.23  | 0.02319  |
| <b>C7ORF40</b>  | -1.66 | 1.00E-05 |
| <b>LAT</b>      | 2.5   | 0        |
| <b>REXO4</b>    | -1.74 | 0        |
| <b>FOS</b>      | 1.82  | 1.00E-05 |
| <b>CCPG1</b>    | 2.19  | 0        |
| <b>PDGFA</b>    | 4.11  | 0.03756  |
| <b>LPIN2</b>    | 1.62  | 0        |
| <b>WIPI1</b>    | 3.31  | 0.00212  |
| <b>TNFSF13B</b> | -1.64 | 0        |
| <b>SCN2A</b>    | 4.59  | 0.01655  |
| <b>PUS7</b>     | -2.48 | 0        |
| <b>KIAA1370</b> | 2.07  | 0        |
| <b>SLC38A3</b>  | 2.28  | 0.03778  |
| <b>SOHLH2</b>   | -1.73 | 5.00E-04 |
| <b>PRG2</b>     | -3.67 | 0        |

|           |       |          |
|-----------|-------|----------|
| PRRG2     | -2.11 | 0.03191  |
| HTR6      | -2.59 | 0.01227  |
| RHOB      | 2.06  | 0.01693  |
| CAD       | -1.88 | 1.00E-05 |
| NFE2L3    | -1.69 | 0        |
| DOCK10    | 1.86  | 0        |
| SECISBP2L | 2.22  | 0        |
| GPR34     | 3.94  | 3.00E-05 |
| TMEM91    | 1.81  | 0.00645  |
| SASH3     | 2.72  | 1.00E-05 |
| ABCB10    | -2.53 | 0        |
| QTRT1     | -1.61 | 2.00E-04 |
| DEFB115   | 2.44  | 0.04626  |
| DPH2      | -1.95 | 0        |
| IFI30     | 5.71  | 3.00E-05 |
| DDN       | -4.74 | 0        |
| TNKS1BP1  | -1.99 | 0.00016  |
| CA10      | 2.52  | 0.02538  |
| MPP6      | -2.17 | 0        |
| PLSCR1    | 1.59  | 0.00296  |
| SP140     | 2.81  | 2.00E-05 |
| G6PD      | 2.36  | 0        |
| TMEM71    | 3.89  | 4.00E-05 |
| ELOVL6    | -1.77 | 0        |
| FEZ1      | -2.58 | 0        |
| KHDRBS3   | -1.9  | 0.00968  |
| TPK1      | 1.61  | 1.00E-05 |
| MGC35361  | -1.5  | 0.00013  |
| CPEB4     | 2.33  | 7.00E-05 |

|           |       |          |
|-----------|-------|----------|
| ACVR1     | 3.38  | 0        |
| ICAM1     | 2.34  | 6.00E-04 |
| MTHFS     | 1.5   | 2.00E-05 |
| C12ORF66  | -1.7  | 0.00154  |
| THBS1     | 6.78  | 0.00074  |
| RBM47     | 3.43  | 0        |
| C7ORF68   | -2.44 | 0        |
| NMNAT3    | -1.9  | 0.00913  |
| ACSL1     | 2.19  | 0        |
| RNU1G2    | 1.64  | 0        |
| FMO5      | 1.72  | 0.00021  |
| ASMTL     | -1.54 | 4.00E-04 |
| PTPRG     | 1.81  | 0.0423   |
| IQSEC1    | 2.66  | 0.00551  |
| PATZ1     | -1.52 | 0.00031  |
| ZNF433    | 2.07  | 0.04046  |
| FTHL11    | 3.3   | 0        |
| SRGAP1    | 2.43  | 0.00082  |
| APLP2     | 2.03  | 0        |
| CAMSAP1L1 | 2.41  | 0.00632  |
| HPDL      | -3.55 | 0        |
| TRIM38    | 1.9   | 5.00E-05 |
| C10ORF54  | 4.41  | 0        |
| CA2       | -1.66 | 0        |
| CYBB      | 2.96  | 0        |
| IL6ST     | 2.22  | 0.04625  |
| CYTIP     | 1.5   | 0.00249  |
| ABHD8     | 3.5   | 0        |
| CRYZ      | -1.92 | 0        |

|          |       |          |
|----------|-------|----------|
| SPTA1    | 1.78  | 0.02425  |
| PMAIP1   | 1.76  | 0        |
| ASNS     | -1.75 | 0        |
| MAPK13   | 1.78  | 0.00093  |
| MTHFD1L  | -1.87 | 0        |
| EIF4EBP1 | -1.5  | 8.00E-05 |
| C1ORF183 | 2.4   | 0.02246  |
| SLC43A2  | 4.07  | 7.00E-05 |
| SORD     | -1.6  | 0        |
| SPNS3    | -4.63 | 1.00E-05 |
| HRH1     | 1.6   | 0.00105  |
| NID2     | 1.97  | 0.03568  |
| NUDT16L1 | -1.66 | 0        |
| TMEM97   | -1.88 | 0        |
| WDR27    | -1.6  | 3.00E-05 |
| PAX8     | 1.6   | 0.03484  |
| FUCA1    | 1.65  | 0        |
| TMEM231  | -1.89 | 1.00E-05 |
| HIF1A    | 1.66  | 0        |
| GRN      | 1.68  | 0        |
| GRPR     | 2.56  | 0.00261  |
| BEX1     | -1.62 | 1.00E-04 |
| OXCT2    | -1.9  | 0        |
| SCAMP1   | -1.64 | 0        |
| LDLRAD3  | -2.04 | 1.00E-05 |
| EID3     | 2.56  | 0.00077  |
| SLC25A19 | -2.23 | 0        |
| NPR2     | 2.16  | 0.00576  |
| FBL      | -1.83 | 0        |

|           |       |          |
|-----------|-------|----------|
| CHST12    | -1.77 | 3.00E-05 |
| TNFRSF14  | 3.04  | 0        |
| ID2       | 2.47  | 0        |
| PRLR      | -2.93 | 0.00047  |
| PANX2     | 2.11  | 0        |
| ANKLE1    | -1.95 | 0        |
| BZW2      | -1.71 | 0        |
| FLRT2     | 2.47  | 0.02116  |
| FTSJ1     | -1.6  | 0        |
| SLC15A3   | 2.49  | 0        |
| POP1      | -1.55 | 0        |
| GLRX      | 2.35  | 0        |
| TMEM161A  | -2.34 | 0.00082  |
| HIST1H2BK | 1.79  | 0        |
| KIAA1618  | 3.54  | 2.00E-05 |
| RIT1      | 2.44  | 0        |
| TMEM144   | 1.65  | 2.00E-05 |
| SRC       | 2.3   | 0.04489  |
| ITM2A     | -1.96 | 0.00013  |
| MINA      | -1.53 | 2.00E-05 |
| ITGAX     | 4.55  | 0.01101  |
| AFMID     | -2.29 | 5.00E-05 |
| GPR84     | 2.71  | 0        |
| DNHL1     | 1.65  | 0.02201  |
| NHEDC2    | -2.14 | 2.00E-05 |
| MRPS2     | -1.66 | 4.00E-05 |
| CIRH1A    | -1.78 | 0        |
| GRINA     | 1.51  | 0        |
| PTPRO     | 4.02  | 0        |

|          |       |          |
|----------|-------|----------|
| C10ORF10 | -3.75 | 0.03697  |
| DNAJB2   | 1.93  | 0        |
| KIAA0133 | -1.63 | 0.00164  |
| ZFAND3   | 1.5   | 0.02012  |
| RHBDL2   | 2.18  | 0.03799  |
| PPAT     | -1.9  | 0        |
| MBLAC2   | -1.86 | 0        |
| FILIP1L  | 2.87  | 0        |
| CLYBL    | -1.87 | 0        |
| FLJ42986 | 3.85  | 0        |
| KILLIN   | -1.95 | 0.01489  |
| SLC39A3  | -1.97 | 0        |
| FLJ13305 | -1.83 | 1.00E-05 |
| OSBPL11  | 1.82  | 2.00E-05 |
| GPR85    | -4.02 | 0.01673  |
| LRRC20   | -1.85 | 0        |
| ZNF185   | -1.79 | 0.01349  |
| SLC7A7   | 2.93  | 0        |
| CA8      | -2.87 | 0        |
| IL10RA   | 2.66  | 0        |
| LMO3     | 1.85  | 0.01799  |
| SLC25A10 | -1.54 | 1.00E-05 |
| SYDE1    | 3.29  | 0.00452  |
| SOCS2    | -3.01 | 0        |
| ADAMTS3  | -3.61 | 0.03369  |
| GBP3     | 2.56  | 0.00154  |
| ADAP2    | 4.03  | 0        |
| SNORD3C  | 2.21  | 0.00016  |
| ICAM3    | 2.12  | 0        |



|          |       |          |
|----------|-------|----------|
| DOCK5    | 3.39  | 2.00E-04 |
| IL4R     | 2.39  | 0        |
| SLC1A3   | -1.64 | 2.00E-05 |
| ADAM8    | 2.52  | 8.00E-05 |
| SCO2     | -1.57 | 0        |
| PTAFR    | 1.86  | 0.00041  |
| ROBO2    | 1.76  | 0.00643  |
| CENPV    | -1.85 | 0        |
| BEND6    | -1.69 | 0.00045  |
| MOBKL2C  | 1.57  | 0.00016  |
| IFNGR1   | 1.71  | 0        |
| SLC29A2  | -2.59 | 0        |
| ZSCAN23  | -2.01 | 0.00311  |
| TMOD1    | -2.02 | 8.00E-05 |
| MIR1275  | 2.7   | 0.00119  |
| CD320    | -3.42 | 1.00E-05 |
| NOLA1    | -1.65 | 0        |
| JUP      | -1.6  | 1.00E-05 |
| SNORA28  | 1.98  | 0.02917  |
| FAM162A  | -1.75 | 1.00E-05 |
| SH3BGRL3 | 2.49  | 0        |
| TGFBR2   | 1.79  | 0        |
| GLIPR1   | 2.68  | 0        |
| DEAF1    | -1.69 | 6.00E-05 |
| DDX60L   | 2.65  | 0        |
| OAF      | -1.81 | 0        |
| SLC39A10 | -1.8  | 1.00E-05 |
| GAS7     | 2.28  | 0        |
| MDN1     | -1.95 | 1.00E-05 |

|                  |       |          |
|------------------|-------|----------|
| <b>CTNNAL1</b>   | -1.65 | 0        |
| <b>EHD1</b>      | 1.6   | 1.00E-05 |
| <b>TNFAIP2</b>   | 3.56  | 0        |
| <b>ATP6V0A1</b>  | 2.17  | 0        |
| <b>SRA1</b>      | 1.66  | 3.00E-05 |
| <b>B3GNT6</b>    | -2.12 | 0.00037  |
| <b>MEST</b>      | -1.92 | 0.03045  |
| <b>IMMP2L</b>    | -2.84 | 0        |
| <b>ACN9</b>      | -1.5  | 0        |
| <b>FERMT1</b>    | -1.52 | 0.00409  |
| <b>C12ORF35</b>  | 1.72  | 0        |
| <b>PEMT</b>      | -1.54 | 0        |
| <b>OR51D1</b>    | 1.52  | 0.03413  |
| <b>KCNN2</b>     | -2.92 | 0        |
| <b>SYNJ1</b>     | 1.95  | 0        |
| <b>TRAF3IP3</b>  | 2.56  | 1.00E-05 |
| <b>CHCHD6</b>    | -2.05 | 0        |
| <b>KCTD7</b>     | 1.74  | 0.04794  |
| <b>EMR4P</b>     | 2.08  | 0.00012  |
| <b>SERPINB10</b> | -3.42 | 0        |
| <b>CD300LF</b>   | 1.88  | 0        |
| <b>DENND4C</b>   | 2     | 0        |
| <b>WSB2</b>      | 3.39  | 1.00E-05 |
| <b>RPS7</b>      | -2.15 | 0        |
| <b>TIRAP</b>     | 1.55  | 0.00337  |
| <b>SLC6A12</b>   | 1.72  | 0.02221  |
| <b>ADAM17</b>    | 1.86  | 1.00E-05 |
| <b>LY6E</b>      | -1.77 | 0        |
| <b>F5</b>        | 2.78  | 0.0236   |

|                   |       |          |
|-------------------|-------|----------|
| <b>NPM3</b>       | -2.23 | 0        |
| <b>GCAT</b>       | -2.77 | 0        |
| <b>SH3BP1</b>     | 1.59  | 0        |
| <b>FLOT1</b>      | 4.62  | 0        |
| <b>ERMN</b>       | 3.18  | 0.03503  |
| <b>LAPTM5</b>     | 2.41  | 0        |
| <b>NOLC1</b>      | -2.09 | 0        |
| <b>MMP25</b>      | 1.92  | 1.00E-05 |
| <b>NRCAM</b>      | 2     | 0.041    |
| <b>SNORD113-4</b> | 3.24  | 0.01682  |
| <b>HSPC111</b>    | -2    | 0        |
| <b>IDUA</b>       | 3.67  | 0.00145  |
| <b>UGT2B11</b>    | -1.53 | 0.00211  |
| <b>RHOBTB3</b>    | 1.95  | 2.00E-05 |
| <b>HIPK2</b>      | 2.74  | 0        |
| <b>CCND2</b>      | -2.46 | 0        |
| <b>DOK2</b>       | 2.67  | 0        |
| <b>C10ORF2</b>    | -2.35 | 0        |
| <b>LRG1</b>       | 2.11  | 0        |
| <b>CFLAR</b>      | 1.61  | 0        |
| <b>FSTL3</b>      | -1.5  | 0.00893  |
| <b>UBIAD1</b>     | -2.06 | 0        |
| <b>EBNA1BP2</b>   | -1.91 | 0        |
| <b>CXCL6</b>      | 1.59  | 5.00E-05 |
| <b>ADCY4</b>      | 2.26  | 0.04285  |
| <b>PLD3</b>       | 1.82  | 0        |
| <b>TET1</b>       | -2.79 | 0.00925  |
| <b>ADM</b>        | 3.55  | 0        |
| <b>UPP1</b>       | 3.92  | 0.00047  |

|                 |       |          |
|-----------------|-------|----------|
| <b>CAPN10</b>   | 1.86  | 0.01312  |
| <b>FGD3</b>     | 1.87  | 0        |
| <b>CUEDC1</b>   | 2.68  | 1.00E-05 |
| <b>KIAA1804</b> | -1.74 | 0        |
| <b>FPR2</b>     | 3.19  | 0.01822  |
| <b>SRM</b>      | -2.61 | 0        |
| <b>CRYL1</b>    | 1.96  | 0.00016  |
| <b>WDR18</b>    | -1.77 | 0        |
| <b>C22ORF9</b>  | -1.69 | 0        |
| <b>MXD1</b>     | 1.9   | 2.00E-05 |
| <b>RNF149</b>   | 1.51  | 1.00E-05 |
| <b>SPCS2</b>    | 3.56  | 0.04688  |
| <b>ORM2</b>     | -1.52 | 2.00E-05 |
| <b>SNORA84</b>  | -1.53 | 0.00013  |
| <b>TBC1D2</b>   | 1.9   | 0.01581  |
| <b>PLEKHF1</b>  | 1.59  | 0.01424  |
| <b>MIR425</b>   | -5.5  | 0.02167  |
| <b>YAP1</b>     | 3.04  | 0.00327  |
| <b>FAM104B</b>  | 2.09  | 0.00058  |
| <b>SHISA2</b>   | -2.93 | 0        |
| <b>DEFB122</b>  | -1.53 | 0.01389  |
| <b>ANKRD33</b>  | 3.9   | 0        |
| <b>CABC1</b>    | -1.85 | 0        |
| <b>SNX12</b>    | 2.96  | 0.02612  |
| <b>KLK1</b>     | -3.78 | 0.02241  |
| <b>GPM6B</b>    | -5.02 | 0.00055  |
| <b>SH3RF1</b>   | 1.6   | 0.00011  |
| <b>CLEC4A</b>   | 3.02  | 8.00E-05 |
| <b>SNORD96B</b> | -1.56 | 0.00416  |

|           |       |          |
|-----------|-------|----------|
| MIF       | -2.15 | 0        |
| ERI3      | -1.81 | 0        |
| ENC1      | 1.66  | 3.00E-05 |
| LPPR3     | -3.09 | 0.00698  |
| AIM2      | 2.46  | 1.00E-05 |
| IRF8      | -4.57 | 0        |
| POMT2     | -1.54 | 3.00E-05 |
| BCL3      | 2.97  | 0        |
| TIMP2     | 2.23  | 0.00023  |
| ZBTB44    | -1.52 | 2.00E-05 |
| SLC27A2   | -1.62 | 1.00E-05 |
| SPATA13   | -1.68 | 0.00501  |
| PKD2L1    | 2.27  | 0.01221  |
| FAM46C    | -4.81 | 0        |
| CLIP1     | 1.72  | 0        |
| TDRD7     | -1.72 | 0        |
| CTSA      | 1.61  | 1.00E-05 |
| HIST1H2BD | 3.91  | 0.0221   |
| IGSF6     | 2.06  | 0.04401  |
| ELP2      | -1.6  | 0        |
| HPSE      | 3.16  | 0.00052  |
| IGF2R     | 1.5   | 0        |
| ST6GAL1   | -1.83 | 0        |
| C5ORF13   | -3.07 | 0        |
| FCER1G    | 3.99  | 0        |
| BCL11A    | -4.24 | 0        |
| FRMD7     | 2.39  | 0.00674  |
| F11R      | 1.79  | 1.00E-05 |
| NLRP12    | 2.34  | 1.00E-05 |

|          |       |          |
|----------|-------|----------|
| KITLG    | 3.4   | 4.00E-04 |
| AKR1C3   | 5.41  | 1.00E-04 |
| NPVF     | 2.66  | 0.01457  |
| ELL2     | 1.6   | 2.00E-05 |
| CTSO     | 2.2   | 0.00524  |
| MARS2    | -1.78 | 0        |
| CACNA2D4 | 3.02  | 0        |
| KCTD12   | 1.51  | 0        |
| CTSH     | 1.57  | 1.00E-05 |
| CLEC11A  | -1.72 | 0        |
| FTHL3    | 3.42  | 0        |
| FAM117B  | -2.62 | 0        |
| ARHGAP24 | 1.7   | 0.01219  |
| GPT2     | -1.98 | 0        |
| DOPEY1   | 1.94  | 0.01114  |
| ATP6V1D  | 1.55  | 0        |
| PTGS1    | 2.49  | 1.00E-05 |
| PFKFB4   | 1.55  | 0        |
| TNFSF9   | 2.12  | 2.00E-05 |
| EIF3CL   | -1.52 | 2.00E-05 |
| F3       | 3.29  | 0        |
| CFP      | 2.97  | 0.00309  |
| NINJ1    | 2.55  | 0        |
| MCM3APAS | -1.91 | 0.00196  |
| CTSZ     | 6.08  | 0.00944  |
| SFXN4    | -1.65 | 0        |
| S100A12  | 4.04  | 0.00266  |
| BEND3    | -1.93 | 0.00012  |
| ABHD14A  | -1.54 | 3.00E-05 |

|          |       |          |
|----------|-------|----------|
| MRPL36   | -1.58 | 0        |
| PRICKLE1 | -1.77 | 1.00E-05 |
| CCDC92   | 1.81  | 0.00136  |
| SEMA6B   | 3.11  | 4.00E-05 |
| KLF10    | 2.07  | 3.00E-05 |
| PDE1B    | 2.72  | 0.00067  |
| KIAA1598 | 1.5   | 5.00E-05 |
| FAM131B  | -2.98 | 0.00802  |
| SIGLEC7  | 1.96  | 0.00012  |
| UHRF1    | -1.53 | 1.00E-05 |
| IFRD2    | -2.03 | 0        |
| HIP1     | 2.01  | 1.00E-05 |
| BCAT1    | -1.7  | 0        |
| NARS2    | -1.92 | 0        |
| PNMA3    | -2.55 | 4.00E-05 |
| LPAR1    | 2.96  | 0.00093  |
| DLX1     | -1.53 | 0        |
| FAM20C   | 4.47  | 0.00266  |
| MECR     | -1.97 | 0.00023  |
| WIT1     | -2.34 | 0.00025  |
| CEBPB    | 2.95  | 0        |
| IL18R1   | 4.38  | 7.00E-05 |
| ACOX2    | 1.86  | 0.00097  |
| REXO2    | -1.58 | 0        |
| GEM      | 1.59  | 0.04669  |
| CCL3     | 4.95  | 1.00E-05 |
| TM4SF19  | 4.03  | 0.00228  |
| KRBA1    | -3.35 | 0.00866  |
| TMTC1    | 1.63  | 7.00E-05 |

|          |       |          |
|----------|-------|----------|
| CSF1R    | 2.88  | 0        |
| UAP1     | -1.72 | 1.00E-05 |
| NAGK     | 1.91  | 0        |
| DHODH    | -1.96 | 0.00095  |
| IRF9     | 1.68  | 2.00E-05 |
| CXCL16   | 4.62  | 9.00E-05 |
| NPL      | 1.53  | 0        |
| TBC1D9   | 4.75  | 0.02584  |
| LGR4     | -2.24 | 1.00E-05 |
| RNU1-3   | 1.68  | 0        |
| CALHM2   | 1.7   | 0.00039  |
| CDA      | 1.87  | 8.00E-04 |
| C9ORF89  | 3     | 0        |
| TECPR1   | 1.84  | 0        |
| LPHN2    | -1.55 | 0.00061  |
| MTMR3    | 1.55  | 0        |
| BMP2K    | 1.73  | 0        |
| SLC25A23 | -2.43 | 0        |
| GATM     | -3.38 | 0        |
| SFXN5    | 1.5   | 2.00E-05 |
| PGD      | 2.49  | 0        |
| DYNLT3   | 1.75  | 1.00E-05 |
| NME1     | -2.17 | 0        |
| DLEU1    | -2.27 | 0        |
| POLR3D   | -1.58 | 1.00E-05 |
| FJX1     | -2.72 | 3.00E-05 |
| CLCF1    | 2.14  | 4.00E-05 |
| AMELY    | 1.84  | 0.01581  |
| LACTB    | 1.68  | 0        |



|           |       |          |
|-----------|-------|----------|
| CCDC126   | 1.68  | 1.00E-05 |
| IGSF2     | 2.56  | 0.01395  |
| SYTL3     | 1.93  | 2.00E-05 |
| ISG20L1   | -1.64 | 0        |
| DENND2D   | 2.49  | 0.02099  |
| PYCR1     | -1.67 | 0.00019  |
| PEBP1     | -1.96 | 0        |
| NOTCH1    | 1.67  | 0        |
| CCDC58    | -1.5  | 2.00E-05 |
| DTNA      | -1.96 | 0        |
| MAFF      | 2.54  | 0        |
| LY96      | 3.7   | 0        |
| GEMIN5    | -1.96 | 0        |
| FCHO2     | 3.54  | 0.03137  |
| HRSP12    | -1.58 | 0        |
| ABTB1     | 2.28  | 0.00781  |
| EVPL      | 1.7   | 0.04962  |
| MYBBP1A   | -2.71 | 1.00E-05 |
| ZNF697    | 3.2   | 0.00021  |
| TNFRSF10D | 1.94  | 0.00263  |
| NPC1      | 1.79  | 0        |
| TRIB2     | 2.24  | 0        |
| ITGB5     | 3.39  | 0.01984  |
| ARHGAP27  | 1.87  | 0        |
| CFD       | -2.68 | 0        |
| SYNGR1    | -3.63 | 0        |
| SLC27A5   | -2.25 | 4.00E-05 |
| TRAP1     | -2.39 | 0        |
| PCDHGA3   | 1.87  | 0.03503  |

|            |       |          |
|------------|-------|----------|
| CENPM      | -1.96 | 0        |
| C10ORF118  | 1.62  | 0.00118  |
| YPEL3      | 1.93  | 0.00224  |
| KAT2B      | 2.34  | 0        |
| GINS2      | -1.83 | 0        |
| CYP4B1     | 3.65  | 0        |
| CYP1B1     | 2.6   | 0        |
| EIF2C4     | 1.59  | 0.00592  |
| CXORF15    | -1.78 | 2.00E-05 |
| SAT1       | 1.91  | 0        |
| PDLIM5     | 2.03  | 3.00E-04 |
| BMP8B      | -2.52 | 0        |
| SLC16A10   | -1.73 | 0        |
| BCKDHB     | -1.5  | 0        |
| TTC26      | -1.89 | 1.00E-05 |
| AXUD1      | 2.15  | 0        |
| ASB2       | 1.98  | 0.0189   |
| ASTL       | 1.96  | 0.02589  |
| SPOCD1     | 4.53  | 0.01307  |
| C7ORF65    | -1.62 | 0.03965  |
| METTL1     | -1.71 | 0        |
| MFSD3      | -1.5  | 0        |
| DJ222E13.2 | -1.83 | 5.00E-05 |
| AFF3       | -4.14 | 3.00E-05 |
| MYB        | -1.75 | 0        |
| NAT14      | -1.52 | 0        |
