# Supplementary material
Source: PubMed Central journal article supplement (PMC4936967)
Supplement: NIHMS783958-supplement-12.pdf [file NIHMS783958-supplement-12.pdf]

Table 5 Pathway analysis of GS87, SB and Li from gene microarray study

## GS87 Pathway Analysis

| <b>Upstream Regulator</b>      | <b>Molecule Type</b>    | <b>Activation z-score</b> | <b>p-value of overlap</b> | <b>Mechanistic Network</b> |
|--------------------------------|-------------------------|---------------------------|---------------------------|----------------------------|
| IL26                           | cytokine                | 2                         | 1.90E-05                  | 338 (17)                   |
| MSGN1                          | transcription regulator | 2                         | 4.09E-05                  | 299 (10)                   |
| PADI2                          | enzyme                  | 2                         | 6.38E-03                  | 381 (19)                   |
| TCF12                          | transcription regulator | 2                         | 7.45E-03                  | 340 (20)                   |
| Angiotensin II receptor type 1 | group                   | 2                         | 1.02E-02                  |                            |
| EREG                           | growth factor           | 2                         | 1.02E-02                  |                            |
| oxysterol                      | chemical                | 2                         | 1.02E-02                  |                            |
| TARDBP                         | transcription regulator | 2                         | 1.26E-02                  |                            |
| RAPGEF3                        | other                   | 2                         | 1.53E-02                  |                            |
| HISTONE                        | group                   | 2                         | 1.86E-02                  |                            |
| CYBB                           | enzyme                  | 2                         | 1.86E-02                  |                            |
| CHADL                          | other                   | 2                         | 6.25E-02                  |                            |
| CSF3                           | cytokine                | 2.001                     | 1.83E-16                  | 384 (20)                   |
| ceruletide                     | biologic drug           | 2.007                     | 8.94E-05                  | 341 (20)                   |
| RNASE2                         | enzyme                  | 2.02                      | 2.31E-03                  | 262 (19)                   |
| streptozocin                   | chemical drug           | 2.021                     | 1.43E-06                  | 355 (20)                   |
| JAK1                           | kinase                  | 2.022                     | 6.83E-09                  | 256 (16)                   |
| sulindac sulfide               | chemical drug           | 2.026                     | 2.92E-02                  |                            |
| PDX1                           | transcription regulator | 2.03                      | 1.22E-05                  | 411 (18)                   |
| TNFRSF8                        | transmembrane receptor  | 2.031                     | 1.29E-05                  | 189 (12)                   |
| cadmium                        | chemical toxicant       | 2.031                     | 1.38E-03                  | 282 (18)                   |
| KLF6                           | transcription regulator | 2.032                     | 6.16E-08                  | 355 (16)                   |
| Tlr                            | group                   | 2.032                     | 8.06E-08                  | 344 (18)                   |
| CCL2                           | cytokine                | 2.034                     | 2.16E-05                  | 264 (18)                   |
| IL7                            | cytokine                | 2.035                     | 6.29E-06                  | 386 (24)                   |
| MYOD1                          | transcription regulator | 2.037                     | 2.79E-04                  | 381 (24)                   |
| MAPKAPK2                       | kinase                  | 2.037                     | 3.12E-04                  | 335 (20)                   |
| paclitaxel                     | chemical drug           | 2.038                     | 3.42E-16                  | 374 (19)                   |
| cephaloridine                  | chemical drug           | 2.041                     | 1.64E-02                  |                            |
| SMAD3                          | transcription regulator | 2.044                     | 5.66E-10                  | 454 (19)                   |
| PRL                            | cytokine                | 2.051                     | 5.09E-11                  | 437 (24)                   |
| 25-hydroxycholesterol          | chemical reagent        | 2.054                     | 1.55E-05                  | 386 (21)                   |
| Ras                            | group                   | 2.055                     | 1.54E-06                  | 341 (18)                   |
| BMP6                           | growth factor           | 2.062                     | 3.10E-06                  | 476 (24)                   |
| lysophosphatidic acid          | chemical                | 2.063                     | 2.43E-07                  | 393 (18)                   |
| lfnar                          | group                   | 2.064                     | 2.67E-07                  | 369 (16)                   |
| GDF2                           | growth factor           | 2.077                     | 1.89E-06                  | 352 (19)                   |

|                              |                         |       |          |          |
|------------------------------|-------------------------|-------|----------|----------|
| PRKCZ                        | kinase                  | 2.078 | 2.66E-05 | 294 (18) |
| NFKB1                        | transcription regulator | 2.085 | 5.59E-13 | 330 (12) |
| RET                          | kinase                  | 2.086 | 1.19E-05 | 267 (15) |
| prostaglandin E2             | chemical                | 2.087 | 4.53E-11 | 412 (14) |
| phenylbutazone               | chemical drug           | 2.089 | 1.02E-03 | 222 (13) |
| RHOA                         | enzyme                  | 2.093 | 3.47E-05 | 381 (18) |
| LGALS1                       | other                   | 2.095 | 7.11E-07 | 378 (19) |
| SASH1                        | other                   | 2.111 | 1.09E-03 | 252 (16) |
| 3,3'-diindolylmethane        | chemical drug           | 2.116 | 9.16E-05 | 454 (26) |
| BRCA1                        | transcription regulator | 2.119 | 7.90E-05 | 387 (15) |
| NEDD9                        | other                   | 2.121 | 4.45E-04 | 349 (21) |
| ARHGAP21                     | other                   | 2.121 | 1.54E-03 | 314 (16) |
| BTNL2                        | transmembrane receptor  | 2.121 | 4.17E-02 |          |
| PPIF                         | enzyme                  | 2.121 | 1.24E-01 |          |
| IFNA2                        | cytokine                | 2.128 | 4.44E-12 | 298 (16) |
| alitretinoin                 | chemical drug           | 2.128 | 1.27E-05 | 420 (19) |
| CX3CL1                       | cytokine                | 2.13  | 1.32E-05 | 343 (19) |
| Fc gamma receptor            | group                   | 2.13  | 2.01E-05 | 227 (18) |
| FOXC2                        | transcription regulator | 2.132 | 7.50E-04 | 383 (23) |
| acetaldehyde                 | chemical                | 2.135 | 6.03E-06 | 324 (17) |
| PLAU                         | peptidase               | 2.137 | 9.62E-07 | 345 (19) |
| FOXO4                        | transcription regulator | 2.14  | 9.34E-06 | 382 (19) |
| heme                         | chemical                | 2.149 | 1.49E-06 | 376 (16) |
| delta-9-tetrahydrocannabinol | chemical drug           | 2.15  | 2.64E-03 | 386 (22) |
| cyclic AMP                   | chemical                | 2.151 | 1.23E-05 | 437 (19) |
| DDX58                        | enzyme                  | 2.151 | 6.67E-03 | 253 (16) |
| MOG                          | other                   | 2.153 | 1.87E-04 | 368 (23) |
| leukotriene B4               | chemical                | 2.157 | 4.38E-09 | 304 (19) |
| N-acetylsphingosine          | chemical reagent        | 2.159 | 1.80E-03 | 346 (23) |
| CD44                         | enzyme                  | 2.162 | 4.90E-08 | 429 (22) |
| NfkB-RelA                    | complex                 | 2.163 | 1.32E-05 | 384 (17) |
| dimethyl sulfoxide           | chemical drug           | 2.164 | 1.42E-07 | 382 (17) |
| nickel chloride              | chemical toxicant       | 2.165 | 4.09E-05 | 315 (17) |
| MAPK8                        | kinase                  | 2.168 | 3.65E-05 | 391 (19) |
| RIPK1                        | kinase                  | 2.169 | 4.84E-03 | 246 (19) |
| BSG                          | transporter             | 2.173 | 1.86E-02 |          |
| PLA2G4A                      | enzyme                  | 2.174 | 2.25E-04 | 294 (19) |
| PYCARD                       | transcription regulator | 2.183 | 4.46E-05 | 330 (18) |
| TGFA                         | growth factor           | 2.183 | 7.21E-05 | 392 (16) |
| IGF2                         | growth factor           | 2.183 | 1.24E-04 | 400 (19) |
| chrysotile asbestos          | chemical toxicant       | 2.183 | 8.58E-03 | 409 (18) |

|                          |                         |       |          |          |
|--------------------------|-------------------------|-------|----------|----------|
| PIK3CG                   | kinase                  | 2.184 | 7.87E-04 | 293 (20) |
| lauric acid              | chemical                | 2.187 | 7.49E-04 | 320 (17) |
| diallyl disulfide        | chemical                | 2.189 | 1.20E-02 |          |
| C5                       | other                   | 2.195 | 1.41E-03 | 232 (16) |
| MAPK10                   | kinase                  | 2.197 | 1.37E-04 | 311 (19) |
| pentylentetrazol         | chemical drug           | 2.198 | 3.50E-04 | 364 (22) |
| TET1                     | other                   | 2.198 | 3.91E-03 | 255 (16) |
| fulvestrant              | chemical drug           | 2.2   | 3.17E-05 | 463 (21) |
| NCR2                     | transmembrane receptor  | 2.2   | 1.41E-03 | 325 (19) |
| LCK                      | kinase                  | 2.2   | 4.06E-03 | 380 (22) |
| titanium dioxide         | chemical drug           | 2.201 | 1.39E-02 |          |
| cytarabine               | chemical drug           | 2.205 | 5.79E-04 | 267 (22) |
| peroxynitrite            | chemical toxicant       | 2.207 | 1.04E-03 | 352 (21) |
| DDIT3                    | transcription regulator | 2.208 | 5.29E-03 | 427 (23) |
| AIMP1                    | cytokine                | 2.209 | 2.53E-07 | 266 (18) |
| IL3                      | cytokine                | 2.21  | 1.12E-09 | 336 (20) |
| RORC                     | nuclear receptor        | 2.213 | 8.65E-04 | 273 (18) |
| Raf                      | group                   | 2.213 | 2.31E-03 | 402 (21) |
| IL17a dimer              | complex                 | 2.214 | 5.92E-03 | 251 (17) |
| D-galactosamine          | chemical                | 2.215 | 7.60E-07 | 359 (14) |
| 2-mercaptoacetate        | chemical                | 2.216 | 3.91E-03 | 329 (20) |
| PAX6                     | transcription regulator | 2.216 | 1.30E-01 |          |
| 8-hydroxyguanine         | chemical                | 2.219 | 2.23E-06 | 322 (12) |
| NAMPT                    | cytokine                | 2.219 | 9.03E-06 | 268 (12) |
| NTRK1                    | kinase                  | 2.219 | 8.94E-05 | 324 (23) |
| ACVRL1                   | kinase                  | 2.219 | 1.86E-04 | 395 (24) |
| lymphotoxin-alpha1-beta2 | complex                 | 2.219 | 5.22E-04 | 374 (21) |
| diosgenin                | chemical                | 2.219 | 7.17E-03 | 356 (19) |
| letrozole                | chemical drug           | 2.219 | 1.02E-02 |          |
| RETN                     | other                   | 2.222 | 2.64E-04 | 344 (19) |
| USP7                     | peptidase               | 2.224 | 1.52E-04 | 339 (19) |
| uric acid                | chemical                | 2.225 | 9.99E-06 | 263 (16) |
| 3M-002                   | chemical reagent        | 2.23  | 1.41E-03 | 250 (17) |
| domoic acid              | chemical toxicant       | 2.232 | 4.09E-05 | 381 (20) |
| OGG1                     | enzyme                  | 2.233 | 2.23E-06 | 343 (17) |
| TET2                     | other                   | 2.236 | 7.20E-07 | 99 (8)   |
| IL22                     | cytokine                | 2.236 | 2.05E-04 | 242 (17) |
| D-sphingosine            | chemical                | 2.236 | 2.25E-04 | 282 (17) |
| 7-ketocholesterol        | chemical                | 2.236 | 2.44E-03 | 335 (16) |
| HOXA5                    | transcription regulator | 2.236 | 3.11E-03 | 412 (20) |
| RNASE1                   | enzyme                  | 2.236 | 3.91E-03 | 231 (18) |

|                   |                         |       |          |          |
|-------------------|-------------------------|-------|----------|----------|
| SEMA7A            | transmembrane receptor  | 2.236 | 4.84E-03 | 438 (19) |
| 5-fluorouracil    | chemical drug           | 2.238 | 3.00E-04 | 390 (20) |
| CCL11             | cytokine                | 2.248 | 1.36E-03 | 254 (12) |
| IL32              | cytokine                | 2.26  | 7.16E-05 | 276 (16) |
| methamphetamine   | chemical drug           | 2.263 | 1.83E-05 | 311 (19) |
| ETS1              | transcription regulator | 2.266 | 8.62E-05 | 467 (25) |
| vancomycin        | biologic drug           | 2.266 | 1.24E-04 | 374 (21) |
| 3-deazaneplanocin | chemical drug           | 2.27  | 1.76E-05 | 231 (8)  |
| vinblastine       | chemical drug           | 2.272 | 5.64E-06 | 257 (16) |
| CD40              | transmembrane receptor  | 2.274 | 2.52E-10 | 379 (17) |
| dinoprost         | chemical                | 2.282 | 1.57E-06 | 344 (20) |
| histamine         | chemical                | 2.286 | 5.36E-07 | 287 (20) |
| Mapk              | group                   | 2.287 | 6.33E-09 | 391 (19) |
| DETA-NONOate      | chemical reagent        | 2.287 | 6.02E-06 | 263 (16) |
| Ni2+              | chemical reagent        | 2.287 | 1.89E-05 | 374 (19) |
| TNFRSF1B          | transmembrane receptor  | 2.292 | 1.38E-03 | 276 (18) |
| CD2               | transmembrane receptor  | 2.294 | 2.11E-02 |          |
| okadaic acid      | chemical toxicant       | 2.299 | 6.98E-11 | 341 (18) |
| FN1               | enzyme                  | 2.301 | 7.07E-08 | 393 (21) |
| JAK2              | kinase                  | 2.303 | 6.04E-11 | 375 (15) |
| PTPRJ             | phosphatase             | 2.309 | 1.93E-06 | 338 (19) |
| NUPR1             | transcription regulator | 2.309 | 5.00E-05 | 423 (23) |
| IFNGR1            | transmembrane receptor  | 2.313 | 1.19E-05 | 251 (16) |
| acetaminophen     | chemical drug           | 2.316 | 7.47E-07 | 281 (15) |
| Ifn gamma         | complex                 | 2.323 | 2.23E-06 | 360 (18) |
| Pam3-Cys-Ser-Lys4 | chemical reagent        | 2.327 | 2.42E-08 | 253 (16) |
| triclosan         | chemical drug           | 2.333 | 4.71E-08 | 347 (16) |
| EHF               | transcription regulator | 2.333 | 7.98E-03 | 263 (18) |
| DOCK8             | other                   | 2.333 | 9.55E-03 | 247 (17) |
| PRKCE             | kinase                  | 2.338 | 2.54E-07 | 287 (19) |
| RICTOR            | other                   | 2.338 | 5.12E-01 |          |
| IL17C             | cytokine                | 2.346 | 1.10E-05 | 251 (20) |
| nitroprusside     | chemical drug           | 2.348 | 2.94E-06 | 317 (17) |
| formaldehyde      | chemical                | 2.351 | 4.71E-04 | 369 (23) |
| linoleic acid     | chemical                | 2.353 | 3.83E-04 | 379 (20) |
| IL3               | cytokine                | 2.356 | 1.00E-12 | 375 (21) |
| ETV4              | transcription regulator | 2.356 | 9.13E-04 | 440 (23) |
| MAP2K1/2          | group                   | 2.365 | 6.66E-09 | 376 (20) |
| IL17RA            | transmembrane receptor  | 2.372 | 1.66E-07 | 242 (13) |
| PDGFB             | growth factor           | 2.372 | 4.80E-07 | 324 (18) |
| colchicine        | chemical drug           | 2.374 | 5.31E-02 |          |

|                             |                            |       |          |          |
|-----------------------------|----------------------------|-------|----------|----------|
| IL23A                       | cytokine                   | 2.375 | 4.82E-03 | 348 (24) |
| JUN                         | transcription regulator    | 2.376 | 5.40E-10 | 332 (17) |
| JUNB                        | transcription regulator    | 2.377 | 1.66E-05 | 288 (18) |
| hyaluronic acid             | chemical                   | 2.383 | 4.70E-09 | 370 (18) |
| reactive oxygen species     | chemical toxicant          | 2.387 | 1.80E-07 | 329 (16) |
| sphingosine-1-phosphate     | chemical                   | 2.387 | 1.72E-05 | 369 (19) |
| methylnitronitrosoguanidine | chemical toxicant          | 2.39  | 3.40E-03 | 427 (21) |
| PLAUR                       | transmembrane receptor     | 2.396 | 8.13E-06 | 352 (16) |
| genistein                   | chemical drug              | 2.398 | 1.24E-19 | 369 (17) |
| C5AR1                       | g-protein coupled receptor | 2.399 | 1.45E-04 | 265 (15) |
| CXCL8                       | cytokine                   | 2.401 | 1.29E-07 | 341 (19) |
| TAC1                        | other                      | 2.401 | 9.50E-05 | 286 (19) |
| romidepsin                  | biologic drug              | 2.404 | 6.90E-08 | 415 (21) |
| S1PR2                       | g-protein coupled receptor | 2.404 | 6.71E-05 | 272 (17) |
| MAPK13                      | kinase                     | 2.404 | 4.15E-04 | 337 (22) |
| gentamicin                  | chemical drug              | 2.405 | 1.59E-09 | 388 (17) |
| Pro-inflammatory Cytokine   | group                      | 2.408 | 6.37E-05 | 398 (16) |
| CXCL2                       | cytokine                   | 2.408 | 1.03E-04 | 281 (18) |
| IL12 (family)               | group                      | 2.409 | 1.60E-04 | 374 (21) |
| S100A9                      | other                      | 2.412 | 9.13E-04 | 392 (21) |
| SYK                         | kinase                     | 2.412 | 1.89E-02 |          |
| monocrotaline               | chemical toxicant          | 2.414 | 1.63E-03 | 389 (19) |
| panobinostat                | chemical drug              | 2.417 | 1.88E-03 | 402 (23) |
| MAPK12                      | kinase                     | 2.418 | 2.17E-04 | 237 (17) |
| TLR5                        | transmembrane receptor     | 2.42  | 2.72E-03 | 279 (17) |
| EPHB1                       | kinase                     | 2.429 | 3.53E-06 | 318 (23) |
| TRPV4                       | ion channel                | 2.429 | 1.20E-03 | 295 (18) |
| nitroarginine               | chemical reagent           | 2.429 | 2.82E-03 | 331 (19) |
| EDNRA                       | transmembrane receptor     | 2.433 | 4.66E-06 | 433 (22) |
| CFB                         | peptidase                  | 2.433 | 1.03E-04 | 325 (21) |
| CD40LG                      | cytokine                   | 2.437 | 3.22E-19 | 347 (16) |
| benzo(a)pyrene              | chemical toxicant          | 2.447 | 1.67E-06 | 345 (18) |
| arachidonic acid            | chemical                   | 2.447 | 9.99E-06 | 346 (20) |
| LY-2510924                  | biologic drug              | 2.447 | 1.42E-05 |          |
| ST3-Hel2A-2                 | chemical reagent           | 2.449 | 7.43E-06 | 260 (15) |
| BTC                         | growth factor              | 2.449 | 1.42E-05 | 402 (18) |
| nitric oxide                | chemical                   | 2.451 | 3.55E-09 | 387 (16) |
| ceramide                    | chemical                   | 2.457 | 5.48E-07 | 373 (19) |
| TGFB3                       | growth factor              | 2.458 | 6.95E-03 | 398 (19) |
| KLF4                        | transcription regulator    | 2.462 | 1.22E-04 | 424 (21) |
| camptothecin                | chemical drug              | 2.475 | 4.19E-18 | 281 (15) |

|                   |                         |       |          |          |
|-------------------|-------------------------|-------|----------|----------|
| Lh                | complex                 | 2.477 | 2.13E-06 | 452 (20) |
| TFEB              | transcription regulator | 2.482 | 8.13E-06 | 179 (7)  |
| F3                | transmembrane receptor  | 2.493 | 4.34E-06 | 254 (18) |
| Map3k7            | kinase                  | 2.494 | 1.23E-06 | 420 (23) |
| trovafloxacin     | chemical drug           | 2.496 | 4.37E-05 | 417 (16) |
| SAMSN1            | other                   | 2.5   | 1.80E-05 | 367 (16) |
| C5                | cytokine                | 2.501 | 1.96E-13 | 389 (17) |
| IGF1              | growth factor           | 2.502 | 4.08E-11 | 379 (17) |
| cocaine           | chemical drug           | 2.509 | 1.06E-06 | 396 (24) |
| thioacetamide     | chemical toxicant       | 2.511 | 1.59E-05 | 399 (19) |
| tamoxifen         | chemical drug           | 2.515 | 3.47E-08 | 398 (22) |
| Pkc(s)            | group                   | 2.517 | 3.22E-09 | 388 (16) |
| 5-azacytidine     | chemical drug           | 2.529 | 8.15E-04 | 475 (21) |
| CREB1             | transcription regulator | 2.535 | 1.49E-08 | 427 (26) |
| Pam3-Cys          | chemical toxicant       | 2.538 | 1.81E-05 | 240 (16) |
| ethionine         | chemical toxicant       | 2.538 | 2.33E-05 | 192 (7)  |
| 2-bromoethylamine | chemical reagent        | 2.538 | 1.87E-04 | 192 (7)  |
| CAMP              | other                   | 2.539 | 8.86E-07 | 340 (19) |
| VitaminD3-VDR-RXR | complex                 | 2.547 | 1.07E-04 | 377 (22) |
| IRF5              | transcription regulator | 2.547 | 8.69E-03 | 327 (17) |
| ELANE             | peptidase               | 2.55  | 1.75E-09 | 328 (20) |
| ozone             | chemical toxicant       | 2.55  | 3.62E-07 | 292 (18) |
| SYVN1             | transporter             | 2.558 | 1.73E-06 |          |
| Tnf (family)      | group                   | 2.564 | 1.55E-04 | 278 (17) |
| PGF               | growth factor           | 2.565 | 2.66E-05 | 275 (18) |
| Akt               | group                   | 2.574 | 1.90E-10 | 335 (15) |
| IL21              | cytokine                | 2.581 | 2.02E-06 | 361 (19) |
| GAST              | other                   | 2.582 | 1.66E-04 | 356 (22) |
| LEP               | growth factor           | 2.583 | 6.54E-10 | 378 (18) |
| IL17F             | cytokine                | 2.586 | 4.71E-04 | 279 (15) |
| PTK2              | kinase                  | 2.586 | 3.19E-03 | 410 (21) |
| PTGS2             | enzyme                  | 2.592 | 7.42E-06 | 349 (17) |
| trichostatin A    | chemical drug           | 2.593 | 4.14E-11 | 405 (22) |
| FGF10             | growth factor           | 2.596 | 7.65E-05 | 325 (16) |
| GNRH1             | other                   | 2.597 | 2.84E-02 |          |
| carbamylcholine   | chemical drug           | 2.602 | 3.19E-03 | 335 (21) |
| PI3K (family)     | group                   | 2.606 | 2.48E-10 | 350 (20) |
| MAP3K1            | kinase                  | 2.606 | 4.29E-04 | 268 (17) |
| bryostatin 1      | chemical drug           | 2.61  | 2.87E-04 | 388 (23) |
| SELP              | transmembrane receptor  | 2.617 | 6.79E-09 | 393 (18) |
| cholecalciferol   | chemical                | 2.623 | 5.31E-06 | 465 (25) |

|                         |                            |       |          |          |
|-------------------------|----------------------------|-------|----------|----------|
| NGF                     | growth factor              | 2.623 | 8.15E-05 | 342 (18) |
| CpG ODN 1668            | chemical reagent           | 2.626 | 5.00E-04 | 258 (19) |
| resiquimod              | chemical drug              | 2.637 | 9.90E-08 | 258 (15) |
| KLK5                    | peptidase                  | 2.646 | 2.01E-05 | 316 (21) |
| calyculin A             | chemical toxicant          | 2.646 | 4.46E-05 | 352 (18) |
| sodium arsenite         | chemical drug              | 2.663 | 3.94E-08 | 343 (18) |
| SPI1                    | transcription regulator    | 2.665 | 1.22E-15 | 380 (25) |
| fluticasone             | chemical drug              | 2.676 | 4.77E-17 | 298 (17) |
| HRAS                    | enzyme                     | 2.677 | 3.48E-14 | 447 (21) |
| MIF                     | cytokine                   | 2.682 | 2.62E-06 | 317 (19) |
| SIM1                    | transcription regulator    | 2.683 | 7.95E-03 | 355 (23) |
| Fcer1                   | complex                    | 2.689 | 1.06E-05 | 364 (20) |
| cisplatin               | chemical drug              | 2.695 | 1.87E-16 | 468 (21) |
| TRAF6                   | enzyme                     | 2.695 | 5.29E-03 | 297 (14) |
| norepinephrine          | chemical                   | 2.712 | 3.16E-04 | 271 (17) |
| Fibrinogen              | complex                    | 2.715 | 4.71E-07 | 284 (17) |
| ITK                     | kinase                     | 2.728 | 3.21E-03 | 398 (20) |
| arsenite                | chemical toxicant          | 2.738 | 1.68E-06 | 365 (20) |
| TYROBP                  | transmembrane receptor     | 2.739 | 1.41E-08 | 330 (20) |
| CTNNB1                  | transcription regulator    | 2.743 | 8.93E-06 | 372 (24) |
| MAP2K3                  | kinase                     | 2.76  | 1.10E-05 | 334 (18) |
| CYP2E1                  | enzyme                     | 2.762 | 3.91E-06 | 314 (19) |
| AREG                    | growth factor              | 2.764 | 8.74E-05 | 399 (19) |
| NADPH oxidase           | complex                    | 2.765 | 1.63E-07 | 312 (14) |
| N-formyl-Met-Leu-Phe    | chemical reagent           | 2.765 | 2.64E-04 | 205 (14) |
| carrageenan             | chemical                   | 2.766 | 5.65E-07 | 385 (23) |
| MAPK7                   | kinase                     | 2.768 | 2.01E-05 | 304 (24) |
| Tgf beta                | group                      | 2.776 | 1.02E-07 | 345 (18) |
| methyl methanesulfonate | chemical toxicant          | 2.777 | 1.54E-03 | 375 (17) |
| SRC (family)            | group                      | 2.778 | 7.16E-05 | 369 (23) |
| IRF6                    | transcription regulator    | 2.779 | 2.18E-04 | 228 (19) |
| Ccl2                    | cytokine                   | 2.781 | 1.09E-04 | 348 (16) |
| F2R                     | g-protein coupled receptor | 2.782 | 7.15E-06 | 357 (18) |
| mycophenolic acid       | chemical drug              | 2.793 | 5.78E-12 | 293 (17) |
| STAT1                   | transcription regulator    | 2.793 | 1.22E-11 | 371 (19) |
| AGN194204               | chemical drug              | 2.794 | 1.24E-04 | 435 (20) |
| lipoarabinomannan       | chemical                   | 2.795 | 1.19E-06 | 326 (21) |
| cis-urocanic acid       | chemical drug              | 2.8   | 9.03E-06 | 353 (14) |
| CD14                    | transmembrane receptor     | 2.805 | 7.65E-05 | 234 (18) |
| D-fructose              | chemical                   | 2.815 | 1.01E-06 | 323 (20) |
| leukotriene C4          | chemical                   | 2.82  | 2.53E-07 | 336 (17) |



|                            |                         |       |          |          |
|----------------------------|-------------------------|-------|----------|----------|
| IRF1                       | transcription regulator | 2.827 | 4.78E-06 | 389 (17) |
| KRT17                      | other                   | 2.828 | 1.14E-04 | 316 (17) |
| 3-methylcholanthrene       | chemical toxicant       | 2.835 | 2.23E-04 | 422 (21) |
| ARNT2                      | transcription regulator | 2.837 | 2.72E-03 | 355 (23) |
| FOXO1                      | transcription regulator | 2.856 | 1.47E-10 | 393 (17) |
| Cg                         | complex                 | 2.865 | 1.94E-16 | 462 (20) |
| IL12 (complex)             | complex                 | 2.87  | 4.29E-09 | 385 (18) |
| captopril                  | chemical drug           | 2.902 | 1.26E-04 | 395 (19) |
| ELK1                       | transcription regulator | 2.903 | 2.88E-05 | 298 (19) |
| CpG ODN 1826               | chemical reagent        | 2.907 | 1.95E-07 | 324 (19) |
| sodium chloride            | chemical                | 2.91  | 3.32E-04 | 259 (15) |
| hemozoin                   | chemical                | 2.912 | 3.31E-09 | 244 (16) |
| fatty acid                 | chemical                | 2.918 | 1.80E-05 | 366 (21) |
| zymosan                    | chemical                | 2.922 | 4.72E-06 | 321 (19) |
| ETS2                       | transcription regulator | 2.925 | 1.55E-05 | 410 (22) |
| FOXO3                      | transcription regulator | 2.927 | 1.28E-07 | 405 (23) |
| mitomycin C                | chemical drug           | 2.931 | 7.75E-04 | 374 (22) |
| LCN2                       | transporter             | 2.932 | 2.33E-03 | 246 (14) |
| lipid A                    | chemical toxicant       | 2.936 | 1.19E-05 | 263 (22) |
| bicuculline                | chemical                | 2.946 | 1.45E-04 | 410 (23) |
| ALB                        | transporter             | 2.949 | 3.83E-04 | 336 (19) |
| stallimycin                | biologic drug           | 2.95  | 5.41E-04 | 368 (15) |
| bromodeoxyuridine          | chemical drug           | 2.95  | 1.57E-03 | 368 (15) |
| TREM1                      | transmembrane receptor  | 2.954 | 5.21E-15 | 372 (15) |
| NFKBIA                     | transcription regulator | 2.959 | 1.29E-19 | 381 (14) |
| TNFSF10                    | cytokine                | 2.966 | 6.65E-07 | 390 (20) |
| TRADD                      | other                   | 2.985 | 7.93E-06 | 289 (15) |
| PAF1                       | other                   | 2.985 | 6.39E-04 |          |
| thapsigargin               | chemical toxicant       | 2.994 | 2.06E-10 | 267 (15) |
| aldosterone                | chemical                | 2.994 | 2.55E-05 | 370 (18) |
| RIPK2                      | kinase                  | 2.997 | 2.62E-06 | 383 (24) |
| dalfampridine              | chemical drug           | 3     | 2.66E-05 | 404 (22) |
| platelet activating factor | chemical                | 3.002 | 1.17E-08 | 310 (16) |
| PRKCD                      | kinase                  | 3.005 | 3.43E-09 | 306 (15) |
| HGF                        | growth factor           | 3.007 | 5.15E-15 | 442 (17) |
| L-triiodothyronine         | chemical                | 3.01  | 1.54E-05 | 378 (22) |
| TP53                       | transcription regulator | 3.027 | 3.11E-29 | 466 (17) |
| CEBPD                      | transcription regulator | 3.028 | 2.85E-11 | 391 (18) |
| IRF8                       | transcription regulator | 3.028 | 4.90E-11 | 434 (21) |
| MAPK3                      | kinase                  | 3.056 | 1.45E-06 | 366 (20) |
| butyric acid               | chemical                | 3.06  | 7.73E-19 | 442 (18) |

|                            |                            |       |          |          |
|----------------------------|----------------------------|-------|----------|----------|
| cyclophosphamide           | chemical drug              | 3.062 | 5.44E-06 | 416 (20) |
| ethanol                    | chemical                   | 3.063 | 1.48E-08 | 362 (17) |
| SPP1                       | cytokine                   | 3.066 | 5.81E-12 | 287 (16) |
| TLR9                       | transmembrane receptor     | 3.066 | 8.55E-08 | 369 (17) |
| IL2                        | cytokine                   | 3.071 | 2.16E-22 | 417 (18) |
| IRF7                       | transcription regulator    | 3.072 | 1.29E-06 | 273 (16) |
| TCF7L2                     | transcription regulator    | 3.075 | 3.68E-04 | 363 (23) |
| PF4                        | cytokine                   | 3.086 | 1.47E-07 | 325 (17) |
| MAP2K1                     | kinase                     | 3.092 | 4.83E-10 | 405 (17) |
| FGF2                       | growth factor              | 3.098 | 1.70E-09 | 385 (17) |
| 5-hydroxytryptamine        | chemical                   | 3.105 | 1.48E-09 | 341 (20) |
| TNFRSF1A                   | transmembrane receptor     | 3.108 | 5.87E-06 | 277 (21) |
| forskolin                  | chemical toxicant          | 3.11  | 6.85E-15 | 448 (22) |
| E. coli lipopolysaccharide | chemical                   | 3.126 | 3.21E-08 | 360 (15) |
| etoposide                  | chemical drug              | 3.131 | 6.09E-13 | 214 (14) |
| oblimersen                 | biologic drug              | 3.138 | 4.29E-04 | 415 (24) |
| lipoteichoic acid          | chemical                   | 3.144 | 3.13E-11 | 262 (16) |
| STAT4                      | transcription regulator    | 3.149 | 4.48E-07 | 356 (18) |
| TLR2                       | transmembrane receptor     | 3.15  | 8.21E-06 | 206 (12) |
| CXCL12                     | cytokine                   | 3.161 | 1.64E-05 | 347 (19) |
| HMGB1                      | transcription regulator    | 3.178 | 2.54E-05 | 239 (16) |
| NFATC2                     | transcription regulator    | 3.206 | 1.46E-06 | 395 (15) |
| SP1                        | transcription regulator    | 3.219 | 2.56E-15 | 473 (17) |
| TLR4                       | transmembrane receptor     | 3.22  | 1.60E-20 | 425 (18) |
| hydrogen peroxide          | chemical                   | 3.223 | 7.81E-14 | 352 (17) |
| tributyrin                 | chemical drug              | 3.223 | 2.51E-08 | 336 (19) |
| IL12B                      | cytokine                   | 3.225 | 7.65E-05 | 357 (20) |
| phorbol esters             | chemical                   | 3.231 | 1.35E-05 | 284 (18) |
| F2RL1                      | g-protein coupled receptor | 3.235 | 1.33E-10 | 289 (19) |
| EDN1                       | cytokine                   | 3.241 | 1.02E-05 | 404 (18) |
| NRG1                       | growth factor              | 3.252 | 6.24E-06 | 427 (19) |
| IKBKG                      | kinase                     | 3.259 | 1.36E-10 | 330 (13) |
| BID                        | other                      | 3.302 | 1.73E-10 | 336 (20) |
| CREBBP                     | transcription regulator    | 3.303 | 3.46E-08 | 377 (27) |
| NOS2                       | enzyme                     | 3.312 | 1.16E-07 | 299 (16) |
| Ca2+                       | chemical                   | 3.329 | 3.19E-11 | 387 (17) |
| TGFB1                      | growth factor              | 3.335 | 2.79E-26 | 484 (16) |
| cholesterol                | chemical                   | 3.358 | 6.74E-08 | 325 (22) |
| Ap1                        | complex                    | 3.37  | 2.38E-06 | 290 (20) |
| bucladesine                | chemical toxicant          | 3.393 | 3.39E-08 | 343 (17) |
| VEGFA                      | growth factor              | 3.394 | 1.67E-06 | 337 (17) |

|                     |                         |       |          |          |
|---------------------|-------------------------|-------|----------|----------|
| CEBPB               | transcription regulator | 3.41  | 2.75E-11 | 435 (19) |
| FOXL2               | transcription regulator | 3.411 | 3.16E-07 | 360 (23) |
| OLR1                | transmembrane receptor  | 3.412 | 6.56E-08 | 359 (19) |
| MAPK14              | kinase                  | 3.429 | 8.35E-04 | 284 (18) |
| bleomycin           | chemical drug           | 3.45  | 1.71E-07 | 408 (16) |
| decitabine          | chemical drug           | 3.454 | 2.74E-08 | 475 (20) |
| SELPLG              | other                   | 3.464 | 5.04E-08 | 366 (20) |
| cardiotoxin         | chemical                | 3.5   | 3.81E-06 | 339 (18) |
| EIF2AK2             | kinase                  | 3.507 | 1.66E-08 | 342 (20) |
| IL18                | cytokine                | 3.514 | 1.78E-09 | 374 (18) |
| homocysteine        | chemical                | 3.518 | 4.04E-05 | 295 (16) |
| arsenic trioxide    | chemical drug           | 3.529 | 2.16E-10 | 337 (18) |
| PRKCA               | kinase                  | 3.553 | 9.90E-11 | 341 (18) |
| KITLG               | growth factor           | 3.57  | 4.92E-11 | 382 (24) |
| CSF1                | cytokine                | 3.577 | 1.75E-19 | 404 (17) |
| EP300               | transcription regulator | 3.593 | 1.06E-08 | 491 (22) |
| CpG oligonucleotide | chemical drug           | 3.67  | 6.65E-12 | 337 (15) |
| PI3K (complex)      | complex                 | 3.676 | 2.10E-13 | 338 (15) |
| deferoxamine        | chemical drug           | 3.676 | 2.81E-12 | 376 (15) |
| PPRC1               | transcription regulator | 3.693 | 3.84E-08 | 299 (10) |
| Interferon alpha    | group                   | 3.696 | 1.91E-11 | 374 (16) |
| GnRH-A              | chemical reagent        | 3.706 | 1.83E-05 | 414 (24) |
| IL6R                | transmembrane receptor  | 3.741 | 4.62E-10 | 289 (14) |
| EGF                 | growth factor           | 3.762 | 5.20E-08 | 383 (15) |
| MAP3K8              | kinase                  | 3.765 | 2.11E-06 | 276 (15) |
| APP                 | other                   | 3.768 | 4.37E-14 | 417 (19) |
| RELA                | transcription regulator | 3.776 | 1.51E-13 | 390 (14) |
| cigarette smoke     | chemical toxicant       | 3.782 | 9.76E-10 | 399 (20) |
| ERK1/2              | group                   | 3.805 | 8.31E-11 | 318 (12) |
| D-glucose           | chemical                | 3.826 | 2.46E-16 | 379 (18) |
| IL5                 | cytokine                | 3.84  | 2.49E-16 | 405 (20) |
| palmitic acid       | chemical                | 3.855 | 1.09E-12 | 310 (18) |
| RAF1                | kinase                  | 3.879 | 4.46E-16 | 361 (19) |
| NOD2                | other                   | 3.882 | 1.83E-11 | 330 (20) |
| OSM                 | cytokine                | 3.889 | 4.26E-17 | 455 (16) |
| peptidoglycan       | chemical                | 3.901 | 9.39E-09 | 231 (15) |
| leukotriene D4      | chemical                | 3.91  | 1.22E-08 | 354 (17) |
| kainic acid         | chemical toxicant       | 3.923 | 3.42E-07 | 417 (22) |
| ERK                 | group                   | 3.961 | 8.06E-17 | 392 (16) |
| Jnk                 | group                   | 3.966 | 7.79E-07 | 323 (16) |
| CCL5                | cytokine                | 3.995 | 5.61E-12 | 349 (18) |

|                               |                         |        |          |          |
|-------------------------------|-------------------------|--------|----------|----------|
| LDL                           | complex                 | 4.001  | 9.48E-18 | 441 (18) |
| CHUK                          | kinase                  | 4.042  | 2.16E-15 | 332 (14) |
| TNFSF12                       | cytokine                | 4.047  | 1.16E-09 | 347 (18) |
| EGR1                          | transcription regulator | 4.05   | 9.37E-14 | 407 (20) |
| carbon tetrachloride          | chemical toxicant       | 4.078  | 6.01E-13 | 400 (18) |
| SMARCA4                       | transcription regulator | 4.112  | 2.03E-12 | 423 (22) |
| Nfat (family)                 | group                   | 4.122  | 7.36E-10 | 373 (20) |
| CEBPA                         | transcription regulator | 4.125  | 8.80E-21 | 412 (20) |
| TLR3                          | transmembrane receptor  | 4.164  | 3.09E-10 | 370 (17) |
| IL17A                         | cytokine                | 4.175  | 2.83E-11 | 355 (18) |
| HIF1A                         | transcription regulator | 4.175  | 1.26E-08 | 418 (23) |
| TLR7                          | transmembrane receptor  | 4.197  | 1.31E-08 | 235 (16) |
| IL1A                          | cytokine                | 4.211  | 9.63E-11 | 427 (17) |
| P38 MAPK                      | group                   | 4.236  | 1.53E-13 | 353 (15) |
| mir-223                       | microRNA                | 4.238  | 1.05E-07 | 337 (25) |
| TNFSF11                       | cytokine                | 4.42   | 1.34E-23 | 317 (17) |
| CSF2                          | cytokine                | 4.582  | 1.36E-16 | 422 (15) |
| STAT3                         | transcription regulator | 4.596  | 7.94E-21 | 461 (18) |
| Vegf                          | group                   | 4.632  | 1.49E-13 | 423 (16) |
| doxorubicin                   | chemical drug           | 4.709  | 1.11E-11 | 326 (14) |
| AGT                           | growth factor           | 4.75   | 5.06E-14 | 469 (16) |
| TICAM1                        | other                   | 4.964  | 2.49E-15 | 354 (16) |
| IL1                           | group                   | 4.969  | 5.74E-10 | 384 (15) |
| E. coli B5 lipopolysaccharide | chemical                | 5.142  | 1.61E-12 | 415 (16) |
| IKBKB                         | kinase                  | 5.496  | 9.40E-16 | 330 (14) |
| IL1B                          | cytokine                | 5.552  | 2.79E-26 | 413 (14) |
| NFkB (complex)                | complex                 | 5.579  | 2.87E-20 | 416 (15) |
| MYD88                         | other                   | 5.595  | 5.71E-18 | 383 (16) |
| IL6                           | cytokine                | 5.7    | 6.16E-21 | 421 (14) |
| poly rI:rC-RNA                | biologic drug           | 5.743  | 3.65E-16 | 419 (14) |
| PDGF BB                       | complex                 | 5.93   | 9.88E-16 | 415 (19) |
| IFNG                          | cytokine                | 6.091  | 3.44E-34 | 404 (15) |
| phorbol myristate acetate     | chemical drug           | 6.56   | 5.78E-26 | 492 (19) |
| TNF                           | cytokine                | 6.959  | 3.64E-48 | 452 (16) |
| lipopolysaccharide            | chemical drug           | 7.928  | 2.12E-50 | 454 (14) |
| TGM2                          | enzyme                  | 8.296  | 4.73E-47 | 412 (18) |
| tretinoin                     | chemical                | 8.592  | 5.01E-42 | 477 (22) |
| SB203580                      | chemical                | -5.84  | 5.43E-13 | 387 (16) |
| PD98059                       | chemical                | -5.231 | 7.30E-26 | 367 (17) |
| U0126                         | chemical                | -4.754 | 5.18E-15 | 380 (13) |
| Alpha catenin                 | group                   | -4.722 | 1.02E-08 | 326 (11) |

|                          |                         |        |          |          |
|--------------------------|-------------------------|--------|----------|----------|
| LY294002                 | chemical                | -4.305 | 1.64E-17 | 414 (14) |
| N-acetyl-L-cysteine      | chemical drug           | -4.269 | 6.50E-10 | 375 (18) |
| SP600125                 | chemical                | -3.885 | 1.92E-09 | 327 (17) |
| IL1RN                    | cytokine                | -3.818 | 5.58E-08 | 374 (17) |
| tyrphostin AG 1478       | chemical                | -3.766 | 1.45E-06 | 446 (23) |
| MYC                      | transcription regulator | -3.515 | 5.58E-27 | 499 (25) |
| losartan potassium       | chemical drug           | -3.489 | 6.17E-07 | 344 (18) |
| SFTPA1                   | transporter             | -3.306 | 5.44E-06 | 403 (18) |
| H89                      | chemical                | -3.278 | 3.84E-08 | 348 (16) |
| SOCS1                    | other                   | -3.245 | 4.54E-06 | 266 (17) |
| APOE                     | transporter             | -3.243 | 1.38E-11 | 436 (19) |
| diphenyleneiodonium      | chemical reagent        | -3.243 | 1.09E-04 | 301 (17) |
| DUSP1                    | phosphatase             | -3.2   | 5.39E-10 | 345 (18) |
| wortmannin               | chemical                | -3.194 | 4.84E-11 | 433 (18) |
| epigallocatechin-gallate | chemical drug           | -3.179 | 1.93E-07 | 273 (12) |
| NLRP12                   | other                   | -3.121 | 8.13E-06 | 237 (17) |
| Sb202190                 | chemical                | -3.024 | 1.36E-10 | 385 (16) |
| SMAD7                    | transcription regulator | -3.015 | 1.54E-06 | 308 (15) |
| FBXO32                   | enzyme                  | -2.982 | 3.12E-02 |          |
| etanercept               | biologic drug           | -2.975 | 1.49E-05 | 304 (15) |
| tempol                   | chemical drug           | -2.97  | 2.66E-05 | 375 (20) |
| bisindolylmaleimide I    | chemical                | -2.958 | 1.89E-04 | 414 (20) |
| BRD4                     | kinase                  | -2.915 | 3.99E-18 | 403 (27) |
| BAPTA-AM                 | chemical reagent        | -2.906 | 7.60E-07 | 283 (16) |
| ZFP36                    | transcription regulator | -2.806 | 1.63E-12 | 320 (12) |
| Go 6976                  | chemical                | -2.789 | 1.36E-03 | 340 (20) |
| acetovanillone           | chemical drug           | -2.779 | 2.35E-04 | 256 (19) |
| Bay 11-7082              | chemical                | -2.775 | 1.22E-08 | 308 (21) |
| ADRB                     | group                   | -2.77  | 2.95E-09 | 362 (22) |
| thioctic acid            | chemical drug           | -2.763 | 3.80E-06 | 311 (19) |
| TSC22D3                  | transcription regulator | -2.759 | 7.17E-07 | 320 (16) |
| actinomycin D            | chemical drug           | -2.725 | 1.44E-09 | 454 (17) |
| GFI1                     | transcription regulator | -2.685 | 1.81E-09 | 251 (18) |
| dipyridamole             | chemical drug           | -2.646 | 1.49E-06 | 281 (20) |
| chromium                 | chemical drug           | -2.646 | 1.98E-02 |          |
| candesartan              | chemical drug           | -2.63  | 8.35E-03 | 311 (20) |
| IL10RA                   | transmembrane receptor  | -2.628 | 3.54E-08 | 409 (17) |
| DACH1                    | transcription regulator | -2.608 | 3.19E-03 | 395 (24) |
| ADA                      | enzyme                  | -2.596 | 4.96E-05 | 414 (18) |
| eplerenone               | chemical drug           | -2.564 | 1.69E-06 | 378 (21) |
| SOCS3                    | phosphatase             | -2.562 | 1.26E-04 | 284 (18) |

|                                 |                         |        |          |          |
|---------------------------------|-------------------------|--------|----------|----------|
| thalidomide                     | chemical drug           | -2.559 | 7.40E-04 | 327 (14) |
| Ro31-8220                       | chemical                | -2.54  | 1.72E-07 | 362 (19) |
| CHD4                            | enzyme                  | -2.534 | 4.29E-04 |          |
| PDPK1                           | kinase                  | -2.513 | 5.64E-06 | 323 (20) |
| Nr1h                            | group                   | -2.506 | 7.97E-06 | 306 (20) |
| pyrrolidine dithiocarbamate     | chemical reagent        | -2.505 | 1.95E-06 | 267 (13) |
| curcumin                        | chemical drug           | -2.458 | 1.79E-10 | 353 (18) |
| RABL6                           | other                   | -2.449 | 1.23E-01 |          |
| salicylic acid                  | chemical drug           | -2.446 | 2.22E-07 | 285 (14) |
| ABCB4                           | transporter             | -2.438 | 4.82E-03 | 407 (20) |
| LY6E                            | other                   | -2.429 | 7.43E-06 | 267 (16) |
| kaempferol                      | chemical toxicant       | -2.425 | 2.66E-05 | 285 (17) |
| ADAMTS12                        | peptidase               | -2.425 | 1.88E-03 | 272 (13) |
| HMOX1                           | enzyme                  | -2.42  | 4.49E-07 | 281 (17) |
| SOD1                            | enzyme                  | -2.412 | 3.76E-03 | 332 (21) |
| BACH2                           | transcription regulator | -2.401 | 2.60E-02 |          |
| ESR1                            | nuclear receptor        | -2.398 | 9.10E-16 | 477 (18) |
| bisindolylmaleimide             | chemical                | -2.383 | 1.88E-03 | 280 (19) |
| 2-aminopurine                   | chemical reagent        | -2.368 | 9.44E-04 | 269 (22) |
| valsartan                       | chemical drug           | -2.36  | 2.96E-05 | 414 (21) |
| hydroxypropyl-beta-cyclodextrin | chemical drug           | -2.359 | 1.63E-07 | 285 (16) |
| MYCN                            | transcription regulator | -2.353 | 2.00E-01 |          |
| PTPN6                           | phosphatase             | -2.343 | 7.40E-05 | 246 (15) |
| NS-398                          | chemical reagent        | -2.306 | 1.12E-06 | 346 (18) |
| rottlerin                       | chemical toxicant       | -2.283 | 9.08E-06 | 346 (19) |
| PP1                             | chemical                | -2.28  | 7.42E-08 | 315 (16) |
| Hdac                            | group                   | -2.27  | 6.58E-07 | 433 (24) |
| astragalin                      | chemical                | -2.236 | 1.37E-04 | 341 (19) |
| CBX7                            | other                   | -2.236 | 2.44E-03 | 145 (7)  |
| S100A6                          | transporter             | -2.236 | 1.61E-02 |          |
| nitrofen                        | chemical toxicant       | -2.236 | 4.65E-02 |          |
| CYP1A2                          | enzyme                  | -2.236 | 9.09E-02 |          |
| AG490                           | chemical                | -2.232 | 1.49E-07 | 412 (20) |
| erythromycin                    | chemical drug           | -2.229 | 1.04E-03 | 303 (20) |
| KLF2                            | transcription regulator | -2.22  | 1.07E-12 | 391 (15) |
| ebselen                         | chemical drug           | -2.219 | 2.25E-04 | 272 (18) |
| artesunic acid                  | chemical drug           | -2.219 | 1.87E-03 | 383 (19) |
| BMPER                           | other                   | -2.216 | 1.41E-03 |          |
| mibolerone                      | chemical drug           | -2.216 | 1.86E-03 | 369 (16) |
| Igm                             | complex                 | -2.209 | 5.00E-07 | 340 (18) |
| clarithromycin                  | chemical drug           | -2.207 | 5.22E-04 | 373 (20) |

|                                 |                         |        |          |          |
|---------------------------------|-------------------------|--------|----------|----------|
| manumycin A                     | chemical reagent        | -2.2   | 1.37E-04 | 360 (19) |
| RPSA                            | translation regulator   | -2.2   | 1.86E-02 |          |
| MEOX2                           | transcription regulator | -2.194 | 4.15E-07 | 327 (13) |
| hexamethoxyflavone              | chemical toxicant       | -2.191 | 4.09E-05 | 363 (17) |
| PS-1145                         | chemical                | -2.191 | 2.44E-03 | 302 (15) |
| NAB2                            | transcription regulator | -2.189 | 2.17E-04 | 421 (21) |
| dehydroisoandrosterone          | chemical                | -2.186 | 3.64E-02 |          |
| triflusal                       | chemical drug           | -2.178 | 2.44E-03 | 358 (18) |
| RCAN1                           | transcription regulator | -2.176 | 1.51E-03 | 332 (16) |
| resolvin D1                     | chemical                | -2.171 | 2.46E-06 | 255 (15) |
| vitamin E                       | chemical drug           | -2.167 | 5.37E-05 | 344 (18) |
| KDM1A                           | enzyme                  | -2.163 | 1.04E-01 |          |
| herbimycin                      | chemical                | -2.161 | 1.50E-05 | 346 (17) |
| flutamide                       | chemical drug           | -2.16  | 1.04E-04 | 409 (21) |
| JAG2                            | growth factor           | -2.153 | 4.15E-07 | 366 (16) |
| BACH1                           | transcription regulator | -2.152 | 3.04E-04 | 267 (20) |
| FOSL1                           | transcription regulator | -2.142 | 1.31E-05 | 365 (17) |
| PP2/AG1879                      |                         |        |          |          |
| tyrosine kinase inhibitor       | chemical                | -2.116 | 4.16E-09 | 347 (19) |
| COL18A1                         | other                   | -2.114 | 6.65E-07 | 405 (21) |
| geldanamycin                    | chemical                | -2.101 | 1.88E-02 |          |
| nifedipine                      | chemical drug           | -2.071 | 1.38E-03 | 295 (19) |
| RBPJ                            | transcription regulator | -2.055 | 2.09E-02 |          |
| mir-146                         | microrna                | -2.049 | 2.18E-04 | 363 (21) |
| fasudil                         | chemical drug           | -2.041 | 5.65E-06 | 276 (15) |
| plicamycin                      | chemical drug           | -2.013 | 1.15E-02 |          |
| EGTA acetoxymethyl ester        | chemical reagent        | -2     | 1.02E-04 | 340 (16) |
| rabeprazole                     | chemical drug           | -2     | 2.29E-04 | 368 (18) |
| N,N-dimethylsphingosine         | chemical reagent        | -2     | 2.62E-03 | 326 (17) |
| ethylenediaminetetraacetic acid | chemical drug           | -2     | 3.64E-03 | 246 (18) |
| palmitoleic acid                | chemical                | -2     | 3.64E-03 | 236 (14) |
| NT5E                            | phosphatase             | -2     | 8.16E-03 | 349 (20) |
| USP18                           | peptidase               | -2     | 1.26E-02 |          |

## **SB Pathway Analysis**

| <b>Upstream Regulator</b>     | <b>Molecule Type</b>    | <b>Activation z-score</b> | <b>p-value of overlap</b> | <b>Mechanistic Network</b> |
|-------------------------------|-------------------------|---------------------------|---------------------------|----------------------------|
| KRT17                         | other                   | 2                         | 3.78E-06                  |                            |
| ERK                           | group                   | 2                         | 1.70E-05                  | 28 (21)                    |
| cardiotoxin                   | chemical                | 2                         | 2.07E-03                  |                            |
| IFNG                          | cytokine                | 2.012                     | 6.33E-08                  | 28 (19)                    |
| AGT                           | growth factor           | 2.056                     | 3.77E-07                  | 22 (18)                    |
| IL2                           | cytokine                | 2.099                     | 1.46E-06                  | 26 (16)                    |
| CSF2                          | cytokine                | 2.106                     | 2.13E-02                  |                            |
| kainic acid                   | chemical toxicant       | 2.133                     | 1.53E-04                  | 24 (20)                    |
| tretinoin                     | chemical                | 2.143                     | 1.19E-04                  | 25 (16)                    |
| E. coli B4 lipopolysaccharide | chemical toxicant       | 2.147                     | 2.90E-03                  | 24 (15)                    |
| gentamicin                    | chemical drug           | 2.156                     | 1.78E-03                  | 22 (11)                    |
| PRL                           | cytokine                | 2.156                     | 2.68E-03                  | 23 (19)                    |
| PDGF BB                       | complex                 | 2.158                     | 9.49E-04                  | 20 (18)                    |
| peptidoglycan                 | chemical                | 2.172                     | 3.03E-05                  | 23 (14)                    |
| trinitrobenzenesulfonic acid  | chemical reagent        | 2.18                      | 1.73E-05                  | 21 (10)                    |
| CCL5                          | cytokine                | 2.183                     | 5.41E-06                  | 24 (17)                    |
| IL17A                         | cytokine                | 2.192                     | 6.43E-04                  | 24 (17)                    |
| bleomycin                     | chemical drug           | 2.194                     | 2.44E-04                  | 23 (17)                    |
| okadaic acid                  | chemical toxicant       | 2.195                     | 1.47E-05                  | 31 (18)                    |
| EGR1                          | transcription regulator | 2.196                     | 3.22E-05                  | 31 (20)                    |
| AGER                          | transmembrane receptor  | 2.2                       | 1.67E-07                  | 27 (15)                    |
| E. coli lipopolysaccharide    | chemical                | 2.2                       | 3.77E-06                  | 24 (17)                    |
| SRC                           | kinase                  | 2.213                     | 6.13E-05                  | 24 (17)                    |
| nitrofurantoin                | chemical drug           | 2.213                     | 3.16E-04                  |                            |
| PLAU                          | peptidase               | 2.215                     | 3.49E-06                  | 25 (22)                    |
| lysophosphatidylcholine       | chemical                | 2.219                     | 2.98E-07                  | 20 (17)                    |
| KLF6                          | transcription regulator | 2.229                     | 2.54E-06                  | 23 (18)                    |
| JUN                           | transcription regulator | 2.229                     | 3.53E-03                  | 32 (16)                    |
| MYD88                         | other                   | 2.252                     | 1.36E-08                  | 21 (16)                    |
| NFkB (complex)                | complex                 | 2.258                     | 4.39E-05                  | 29 (19)                    |
| poly rl:rC-RNA                | biologic drug           | 2.269                     | 1.08E-04                  | 24 (17)                    |
| APP                           | other                   | 2.303                     | 1.58E-06                  | 23 (15)                    |
| phorbol myristate acetate     | chemical drug           | 2.31                      | 2.99E-07                  | 26 (20)                    |
| EGF                           | growth factor           | 2.347                     | 7.47E-03                  | 31 (22)                    |
| TNFSF12                       | cytokine                | 2.368                     | 8.74E-07                  | 25 (14)                    |
| F2                            | peptidase               | 2.384                     | 2.67E-04                  | 24 (19)                    |
| Ap1                           | complex                 | 2.387                     | 9.38E-07                  | 24 (13)                    |



|                               |                         |        |          |         |
|-------------------------------|-------------------------|--------|----------|---------|
| E. coli B5 lipopolysaccharide | chemical                | 2.408  | 2.79E-04 | 26 (20) |
| hydrogen peroxide             | chemical                | 2.409  | 1.62E-04 | 31 (18) |
| hemozoin                      | chemical                | 2.411  | 4.65E-10 | 28 (21) |
| Ca2+                          | chemical                | 2.414  | 3.39E-05 | 29 (21) |
| carbon tetrachloride          | chemical toxicant       | 2.42   | 6.78E-06 | 27 (17) |
| TNF                           | cytokine                | 2.437  | 4.19E-07 | 29 (18) |
| IL1B                          | cytokine                | 2.45   | 1.38E-06 | 29 (20) |
| IL18                          | cytokine                | 2.553  | 2.91E-08 | 28 (17) |
| FGF2                          | growth factor           | 2.567  | 3.06E-05 | 23 (19) |
| ERK1/2                        | group                   | 2.586  | 5.22E-05 | 24 (14) |
| IL1A                          | cytokine                | 2.759  | 8.82E-07 | 22 (18) |
| LEP                           | growth factor           | 2.771  | 1.38E-04 | 30 (18) |
| lipopolysaccharide            | chemical drug           | 2.955  | 1.81E-07 | 29 (19) |
| U0126                         | chemical                | -2.949 | 9.97E-07 | 24 (17) |
| LY294002                      | chemical                | -2.681 | 6.23E-05 | 24 (18) |
| PD98059                       | chemical                | -2.662 | 2.13E-05 | 29 (18) |
| curcumin                      | chemical drug           | -2.581 | 3.06E-05 | 28 (20) |
| DUSP1                         | phosphatase             | -2.442 | 4.06E-07 | 24 (17) |
| N-acetyl-L-cysteine           | chemical drug           | -2.409 | 7.11E-05 | 22 (18) |
| simvastatin                   | chemical drug           | -2.226 | 8.17E-05 | 23 (17) |
| TP73                          | transcription regulator | -2.213 | 5.89E-03 | 13 (7)  |
| SB203580                      | chemical                | -2.153 | 2.32E-04 | 28 (17) |

## Lithium Pathway Analysis

| <b>Upstream Regulator</b>    | <b>Molecule Type</b>    | <b>Activation z-score</b> | <b>p-value of overlap</b> | <b>Mechanistic Network</b> |
|------------------------------|-------------------------|---------------------------|---------------------------|----------------------------|
| cardiotoxin                  | chemical                | 2                         | 1.78E-03                  |                            |
| thioacetamide                | chemical toxicant       | 2                         | 1.39E-02                  |                            |
| IL1A                         | cytokine                | 2.033                     | 2.23E-04                  | 32 (19)                    |
| IGF1                         | growth factor           | 2.034                     | 9.80E-05                  | 35 (17)                    |
| RELA                         | transcription regulator | 2.064                     | 1.26E-03                  | 30 (14)                    |
| TLR7                         | transmembrane receptor  | 2.069                     | 1.24E-03                  | 27 (17)                    |
| IL1B                         | cytokine                | 2.074                     | 3.22E-04                  | 30 (21)                    |
| CD40LG                       | cytokine                | 2.084                     | 6.31E-03                  | 22 (13)                    |
| KLF6                         | transcription regulator | 2.145                     | 2.61E-05                  | 26 (18)                    |
| TLR3                         | transmembrane receptor  | 2.152                     | 1.26E-02                  |                            |
| enterotoxin B                | biologic drug           | 2.155                     | 5.83E-05                  | 25 (7)                     |
| AR                           | nuclear receptor        | 2.156                     | 3.39E-02                  |                            |
| TAC1                         | other                   | 2.16                      | 1.15E-04                  | 28 (17)                    |
| PTGS2                        | enzyme                  | 2.165                     | 2.11E-03                  | 33 (18)                    |
| CpG oligonucleotide          | chemical drug           | 2.17                      | 7.40E-04                  | 31 (15)                    |
| HMGB1                        | transcription regulator | 2.171                     | 6.65E-05                  | 25 (14)                    |
| SPP1                         | cytokine                | 2.177                     | 3.37E-03                  | 36 (18)                    |
| hemozoin                     | chemical                | 2.179                     | 4.13E-07                  | 33 (17)                    |
| carbon tetrachloride         | chemical toxicant       | 2.18                      | 9.87E-04                  | 34 (19)                    |
| peptidoglycan                | chemical                | 2.185                     | 2.89E-04                  | 25 (17)                    |
| bleomycin                    | chemical drug           | 2.187                     | 2.11E-03                  | 30 (20)                    |
| trinitrobenzenesulfonic acid | chemical reagent        | 2.192                     | 1.69E-04                  | 28 (10)                    |
| CTNNB1                       | transcription regulator | 2.195                     | 1.47E-02                  |                            |
| KLF4                         | transcription regulator | 2.2                       | 9.41E-03                  | 14 (7)                     |
| JAK2                         | kinase                  | 2.213                     | 5.91E-04                  | 29 (19)                    |
| cytarabine                   | chemical drug           | 2.219                     | 3.83E-05                  | 30 (17)                    |
| IL22                         | cytokine                | 2.219                     | 1.60E-04                  | 27 (14)                    |
| Jnk                          | group                   | 2.221                     | 4.88E-03                  | 31 (20)                    |
| hydrogen peroxide            | chemical                | 2.221                     | 3.99E-02                  |                            |
| APP                          | other                   | 2.258                     | 2.39E-02                  |                            |
| CSF2                         | cytokine                | 2.267                     | 4.18E-03                  | 25 (16)                    |
| doxorubicin                  | chemical drug           | 2.283                     | 2.05E-02                  |                            |
| IFNG                         | cytokine                | 2.297                     | 2.24E-03                  | 38 (16)                    |
| lipopolysaccharide           | chemical drug           | 2.319                     | 5.68E-06                  | 39 (17)                    |
| Pam3-Cys-Ser-Lys4            | chemical reagent        | 2.36                      | 5.27E-05                  | 31 (15)                    |
| IL6R                         | transmembrane receptor  | 2.369                     | 3.58E-06                  | 29 (23)                    |
| AGER                         | transmembrane receptor  | 2.372                     | 2.78E-06                  | 29 (23)                    |

|                               |                         |        |          |         |
|-------------------------------|-------------------------|--------|----------|---------|
| CCL5                          | cytokine                | 2.373  | 3.29E-06 | 34 (20) |
| palmitic acid                 | chemical                | 2.389  | 2.91E-04 | 29 (19) |
| fulvestrant                   | chemical drug           | 2.39   | 3.59E-03 | 37 (18) |
| TNFSF12                       | cytokine                | 2.393  | 1.40E-05 | 40 (18) |
| TLR4                          | transmembrane receptor  | 2.395  | 8.28E-03 | 24 (18) |
| EGR1                          | transcription regulator | 2.412  | 4.45E-04 | 40 (21) |
| MYD88                         | other                   | 2.413  | 1.02E-05 | 30 (15) |
| phorbol myristate acetate     | chemical drug           | 2.484  | 2.90E-10 | 37 (19) |
| tretinoin                     | chemical                | 2.485  | 1.14E-03 | 36 (20) |
| poly rI:rC-RNA                | biologic drug           | 2.508  | 9.62E-03 | 30 (17) |
| ERK                           | group                   | 2.592  | 3.47E-04 | 31 (18) |
| E. coli B5 lipopolysaccharide | chemical                | 2.599  | 6.29E-04 | 31 (16) |
| F2                            | peptidase               | 2.602  | 6.00E-04 | 27 (19) |
| mir-223                       | microrna                | 2.646  | 7.36E-06 |         |
| IL2                           | cytokine                | 2.712  | 2.93E-05 | 30 (17) |
| NFkB (complex)                | complex                 | 2.969  | 7.21E-06 | 23 (16) |
| Alpha catenin                 | group                   | -2.412 | 6.38E-05 | 20 (11) |
| GATA3                         | transcription regulator | -2.224 | 4.67E-03 | 35 (15) |
| Nr1h                          | group                   | -2.219 | 1.12E-03 | 33 (15) |
| ZFP36                         | transcription regulator | -2.208 | 1.20E-08 | 31 (16) |
| SATB1                         | transcription regulator | -2.186 | 2.62E-03 | 12 (7)  |
| FOSL1                         | transcription regulator | -2     | 6.99E-04 | 28 (6)  |
